# Supplementary material
Source: PubMed Central journal article supplement (PMC5995337)
Supplement: NIHMS888166-supplement-Supplementary_Tables.pdf [file NIHMS888166-supplement-Supplementary_Tables.pdf]

**SUPPLEMENTARY TABLE 1. DEMOGRAPHICS and CLINICAL DETAILS**

INTERVAL = Time in nearest month of interval between initial diagnosis of primary cancer and biopsy of metastatic site used in this study

PRIOR THERAPY = Systemic or radiation therapy in the interval between initial diagnosis and metastatic biopsy

HISTOLOG. TYPE = Histological subtype coded using the Oncotree classification system (<http://oncotree.mskcc.org/oncotree/>)

| CASE | ID      | AGE | GENDER | POPULATION  | CANCER TYPE                          | HISTOLOG. |                  | ANALYSIS |                 | INTERVAL<br>(mo) | PRIOR<br>THERAPY | OTHER CANCER HISTORY |
|------|---------|-----|--------|-------------|--------------------------------------|-----------|------------------|----------|-----------------|------------------|------------------|----------------------|
|      |         |     |        |             |                                      | TYPE      | BIOPSY SITE      | COHORT   | PRIMARY SITE    |                  |                  |                      |
| 1    | MO_1001 | 48  | M      | Caucasian   | Colon Adenocarcinoma                 | COAD      | Liver            | COLO     | Colon           | 11               | Y                |                      |
| 2    | MO_1002 | 49  | F      | Caucasian   | Cutaneous Melanoma                   | SKCM      | Skin             | SKCM     | Skin            | 26               | Y                |                      |
| 3    | MO_1005 | 44  | F      | Caucasian   | Solitary Fibrous Tumor               | SFT       | Liver            | SARC     | Unknown         | 108              | Y                |                      |
| 4    | MO_1007 | 62  | F      | Caucasian   | Extrahepatic Cholangiocarcinoma      | EHCH      | Liver            | CHOL     | Gall Bladder    | 6                | Y                |                      |
| 5    | MO_1008 | 47  | M      | Caucasian   | Prostate Adenocarcinoma              | PRAD      | Dura             | PRAD     | Prostate        | 41               | Y                |                      |
| 6    | MO_1011 | 69  | M      | Caucasian   | Dedifferentiated Liposarcoma         | DDL5      | Shoulder         | SARC     | Retroperitoneum | 124              | Y                |                      |
| 7    | MO_1012 | 71  | M      | Caucasian   | Prostate Neuroendocrine Carcinoma    | PRNE      | Subq Nodule      | PRAD     | Prostate        | 91               | Y                |                      |
| 8    | MO_1013 | 55  | M      | Caucasian   | Prostate Adenocarcinoma              | PRAD      | Lymph Node       | PRAD     | Prostate        | 59               | Y                |                      |
| 9    | MO_1014 | 67  | M      | Caucasian   | Prostate Adenocarcinoma              | PRAD      | Lymph Node       | PRAD     | Prostate        | 54               | Y                |                      |
| 10   | MO_1015 | 75  | M      | Caucasian   | Prostate Adenocarcinoma              | PRAD      | Lymph Node       | PRAD     | Prostate        | 122              | Y                |                      |
| 11   | MO_1016 | 80  | M      | Caucasian   | Bladder Urothelial Carcinoma         | BLCA      | Lymph Node       | BLCA     | Bladder         | 90               | Y                |                      |
| 12   | MO_1017 | 66  | M      | East Asian  | Thymic Neuroendocrine Tumor          | TNET      | Lymph Node       | THYM     | Thymus          | 26               | Y                |                      |
| 13   | MO_1020 | 63  | M      | Caucasian   | Prostate Adenocarcinoma              | PRAD      | Liver            | PRAD     | Prostate        | 30               | Y                |                      |
| 14   | MO_1022 | 50  | M      | East Asian  | Extrahepatic Cholangiocarcinoma      | EHCH      | Liver            | CHOL     | Bile Duct       | 13               | Y                |                      |
| 15   | MO_1023 | 54  | M      | Caucasian   | Extraskeletal Myxoid Chondrosarcoma  | EMCHS     | Lung             | SARC     | Thigh           | 36               | Y                |                      |
| 16   | MO_1024 | 57  | M      | Caucasian   | Osteoblastic Osteosarcoma            | OSOS      | Chest Wall       | SARC     | Arm             | 54               | Y                |                      |
| 17   | MO_1025 | 31  | F      | African Am. | Embryonal Rhabdomyosarcoma           | ERMS      | Subq Abdom. Mass | SARC     | Abdomen         | 55               | Y                |                      |
| 18   | MO_1026 | 75  | M      | Caucasian   | Undifferentiated Pleomorphic Sarcoma | MFH       | Forearm Mass     | SARC     | Knee            | 8                | Y                |                      |
| 19   | MO_1027 | 62  | F      | Caucasian   | Extrahepatic Cholangiocarcinoma      | EHCH      | Liver            | CHOL     | Gall Bladder    | 3                | Y                |                      |
| 20   | MO_1028 | 18  | F      | Caucasian   | Adrenocortical Carcinoma             | ACC       | Retroperitoneum  | ACC      | Adrenal         | 19               | Y                |                      |
| 21   | MO_1030 | 78  | F      | Caucasian   | Breast Invasive Lobular Carcinoma    | ILC       | Pancreas         | BRCA     | Breast          | 252              | Y                |                      |
| 22   | MO_1031 | 41  | F      | Caucasian   | Breast Invasive Ductal Carcinoma     | IDC       | Liver            | BRCA     | Breast          | 155              | Y                |                      |
| 23   | MO_1032 | 35  | F      | African Am. | Breast Invasive Ductal Carcinoma     | IDC       | Breast           | BRCA     | Breast          | 44               | Y                |                      |
| 24   | MO_1033 | 54  | F      | Caucasian   | Anal Squamous Cell Carcinoma         | ANSC      | Liver            | COLO     | Anal            | 27               | Y                | Papillary Thyroid    |
| 25   | MO_1034 | 63  | F      | Caucasian   | Atypical Lung Carcinoid              | ALUCA     | Lung             | LUNG     | Lung            | 12               | Y                |                      |
| 26   | MO_1035 | 67  | M      | Caucasian   | Gastrointestinal Stromal Tumor       | GIST      | Retroperitoneum  | STAD     | Stomach         | 127              | Y                |                      |
| 27   | MO_1036 | 34  | F      | Caucasian   | Extrahepatic Cholangiocarcinoma      | EHCH      | Liver            | CHOL     | Bile Duct       | 1                | N                |                      |
| 28   | MO_1037 | 28  | F      | Caucasian   | Desmoplastic Small-Round-Cell Tumor  | DSRCT     | Liver            | PAAD     | Pancreas        | 41               | Y                |                      |
| 29   | MO_1038 | 39  | M      | Caucasian   | Cutaneous Melanoma                   | SKCM      | Lung             | SKCM     | Neck            | 2                | Y                |                      |
| 30   | MO_1039 | 61  | M      | Caucasian   | Intrahepatic Cholangiocarcinoma      | IHCH      | Liver            | CHOL     | Bile Duct       | 1                | N                |                      |
| 31   | MO_1040 | 62  | M      | Caucasian   | Prostate Adenocarcinoma              | PRAD      | Lymph Node       | PRAD     | Prostate        | 210              | Y                |                      |
| 32   | MO_1042 | 26  | F      | Caucasian   | Adrenocortical Carcinoma             | ACC       | Liver            | ACC      | Adrenal         | 34               | Y                |                      |
| 33   | MO_1043 | 48  | F      | Caucasian   | Salivary Clear Cell Carcinoma        |           | Lymph Node       | SECR     | Salivary Gland  | 10               | Y                |                      |

**SUPPLEMENTARY TABLE 1. DEMOGRAPHICS and CLINICAL DETAILS cont.**

| CASE | ID      | AGE | GENDER | POPULATION | CANCER TYPE                          | ONCOTREE |                | ANALYSIS |               | INTERVAL | PRIOR   | OTHER CANCER HISTORY      |
|------|---------|-----|--------|------------|--------------------------------------|----------|----------------|----------|---------------|----------|---------|---------------------------|
|      |         |     |        |            |                                      | CODE     | BIOPSY SITE    | COHORT   | PRIMARY SITE  | (mo)     | THERAPY |                           |
| 34   | MO_1044 | 37  | F      | Caucasian  | Adenoid Cystic Carcinoma             | ACYC     | Lung           | SECR     | Oral Mass     | 146      | Y       |                           |
| 35   | MO_1045 | 60  | M      | Caucasian  | Pancreatic Adenocarcinoma            | PAAD     | Lymph Node     | PAAD     | Pancreas      | 8        | Y       |                           |
| 36   | MO_1046 | 54  | M      | Caucasian  | Penile Squamous Cell Carcinoma       | PSCC     | Bone           | HNSC     | Penis         | 6        | Y       |                           |
| 37   | MO_1047 | 40  | M      | Caucasian  | Ewing Sarcoma                        | ES       | Gluteus Muscle | SARC     | Hip           | 25       | Y       |                           |
| 38   | MO_1048 | 63  | M      | Caucasian  | Colon Adenocarcinoma                 | COAD     | Lymph Node     | COLO     | Colon         | 312      | Y       |                           |
| 39   | MO_1049 | 72  | M      | Caucasian  | Bladder Squamous Cell Carcinoma      | BLSC     | Lymph Node     | BLCA     | Bladder       | 202      | Y       |                           |
| 40   | MO_1050 | 62  | F      | Caucasian  | Serous Ovarian Cancer                | SOC      | Liver          | OV       | Ovary         | 38       | Y       |                           |
| 41   | MO_1051 | 31  | F      | Caucasian  | Breast Invasive Ductal Carcinoma     | IDC      | Liver          | BRCA     | Breast        | 85       | Y       |                           |
| 42   | MO_1052 | 78  | M      | Caucasian  | Anaplastic Thyroid Cancer            | THAP     | Thyroid        | THCA     | Thyroid       | 12       | Y       |                           |
| 43   | MO_1053 | 49  | F      | Caucasian  | Adrenocortical Carcinoma             | ACC      | Adrenal        | ACC      | Adrenal       | 13       | Y       |                           |
| 44   | MO_1055 | 68  | M      | Caucasian  | Cutaneous Squamous Cell Carcinoma    | CSCC     | Liver          | HNSC     | Scalp         | 34       | Y       |                           |
| 45   | MO_1058 | 62  | M      | Caucasian  | Follicular Dendritic Cell Sarcoma    | FDCS     | Neck           | SARC     | Shoulder      | 33       | Y       |                           |
| 46   | MO_1059 | 49  | F      | Caucasian  | Pancreatic Neuroendocrine Tumor      | PANET    | Liver          | PAAD     | Pancreas      | 33       | Y       |                           |
| 47   | MO_1060 | 62  | F      | Caucasian  | High-Grade Serous Ovarian Cancer     | HGSOC    | Lymph Node     | OV       | Ovary         | 26       | Y       |                           |
| 48   | MO_1061 | 39  | F      | Caucasian  | Thymoma                              | THYM     | Lung           | THYM     | Thymus        | 61       | Y       |                           |
| 49   | MO_1062 | 33  | F      | Hispanic   | Ameloblastoma                        |          | Lung           | SECR     | Mandible      | 86       | Y       |                           |
| 50   | MO_1063 | 76  | M      | Caucasian  | Renal Clear Cell Carcinoma           | CCRCC    | Vertebra       | KDNY     | Kidney        | 22       | Y       |                           |
| 51   | MO_1064 | 52  | M      | Caucasian  | Adenoid Cystic Carcinoma             | ACYC     | Lung           | SECR     | Parotid Gland | 132      | Y       |                           |
| 52   | MO_1065 | 46  | F      | Caucasian  | Breast Invasive Ductal Carcinoma     | IDC      | Lymph Node     | BRCA     | Breast        | 74       | Y       |                           |
| 53   | MO_1066 | 63  | M      | Caucasian  | Prostate Adenocarcinoma              | PRAD     | Neck           | PRAD     | Prostate      | 62       | Y       |                           |
| 54   | MO_1067 | 73  | M      | Caucasian  | Esophageal Adenocarcinoma            | ESCA     | Esophagus      | ESCA     | Esophagus     | 7        | Y       | Superficial Urothelial Ca |
| 55   | MO_1068 | 65  | F      | Caucasian  | Breast Invasive Lobular Carcinoma    | ILC      | Lymph Node     | BRCA     | Breast        | 346      | Y       |                           |
| 56   | MO_1069 | 62  | F      | Caucasian  | Breast Invasive Lobular Carcinoma    | ILC      | Lymph Node     | BRCA     | Breast        | 219      | Y       |                           |
| 57   | MO_1070 | 70  | M      | Caucasian  | Cutaneous Melanoma                   | SKCM     | Lymph Node     | SKCM     | Skin (Arm)    | 16       | Y       |                           |
| 58   | MO_1072 | 69  | M      | Caucasian  | Penile Squamous Cell Carcinoma       | PSCC     | Buttock        | HNSC     | Penis         | 81       | Y       | Basal Cell Carcinoma      |
| 59   | MO_1073 | 36  | M      | Caucasian  | Rectal Adenocarcinoma                | READ     | Colon          | COLO     | Rectum        | 0        | N       |                           |
| 60   | MO_1074 | 69  | M      | Caucasian  | Prostate Adenocarcinoma              | PRAD     | Bone           | PRAD     | Prostate      | 129      | Y       |                           |
| 61   | MO_1075 | 22  | M      | Caucasian  | Poorly Differentiated Carcinoma, NOS | PDC      | Lung           | MISC     | Unknown       | 6        | Y       |                           |
| 62   | MO_1076 | 63  | M      | Caucasian  | Dermatofibrosarcoma Protuberans      | DFSP     | Lung           | SARC     | Skin (Neck)   | 29       | Y       |                           |
| 63   | MO_1077 | 65  | F      | Caucasian  | Poorly Differentiated Thyroid Cancer | THPD     | Thyroid        | THCA     | Thyroid       | 1        | N       |                           |
| 64   | MO_1079 | 53  | M      | Caucasian  | Sarcomatoid Carcinoma                |          | Mandible       | MISC     | Mandible      | 0        | N       |                           |
| 65   | MO_1080 | 69  | F      | Caucasian  | Anaplastic Thyroid Cancer            | THAP     | Thyroid        | THCA     | Thyroid       | 3        | Y       | Breast Ductal Carcinoma   |
| 66   | MO_1084 | 77  | M      | Caucasian  | Prostate Adenocarcinoma              | PRAD     | Lymph Node     | PRAD     | Prostate      | 162      | Y       |                           |
| 67   | MO_1085 | 49  | M      | Caucasian  | Gastrointestinal Stromal Tumor       | GIST     | Liver          | STAD     | Small Bowel   | 230      | Y       |                           |
| 68   | MO_1086 | 63  | F      | Caucasian  | Undifferentiated Malignant Neoplasm  | UDMN     | Lung           | MISC     | Unknown       | 11       | Y       |                           |
| 69   | MO_1087 | 61  | M      | Caucasian  | Colon Adenocarcinoma                 | COAD     | Liver          | COLO     | Colon         | 17       | Y       |                           |

**SUPPLEMENTARY TABLE 1. DEMOGRAPHICS and CLINICAL DETAILS cont.**

| CASE | ID      | AGE | GENDER | POPULATION  | CANCER TYPE                                      | ONCOTREE |                   | ANALYSIS |                  | INTERVAL | PRIOR   | OTHER CANCER HISTORY |
|------|---------|-----|--------|-------------|--------------------------------------------------|----------|-------------------|----------|------------------|----------|---------|----------------------|
|      |         |     |        |             |                                                  | CODE     | BIOPSY SITE       | COHORT   | PRIMARY SITE     | (mo)     | THERAPY |                      |
| 70   | MO_1088 | 66  | M      | Caucasian   | Extraskelatal Myxoid Chondrosarcoma              | EMCHS    | Lung              | SARC     | Deltoid          | 18       | Y       |                      |
| 71   | MO_1089 | 58  | F      | Caucasian   | Solid Pseudopapillary Neoplasm of the Pancreas   | SPN      | Periaortic Mass   | PAAD     | Pancreas         | 3        | Y       |                      |
| 72   | MO_1090 | 52  | F      | Caucasian   | Breast Invasive Ductal Carcinoma                 | IDC      | Chest Wall        | BRCA     | Breast           | 227      | Y       | Hodgkin Lymphoma     |
| 73   | MO_1091 | 58  | F      | Caucasian   | Small Cell Bladder Cancer                        | SCBC     | Abdom. Wall       | BLCA     | Bladder          | 3        | Y       |                      |
| 74   | MO_1092 | 62  | F      | Caucasian   | Mucinous Adenocarcinoma                          |          | Lymph Node        | MISC     | Unknown          | 60       | Y       |                      |
| 75   | MO_1093 | 55  | M      | Caucasian   | Prostate Adenocarcinoma                          | PRAD     | Lymph Node        | PRAD     | Prostate         | 1        | Y       |                      |
| 76   | MO_1094 | 67  | M      | Caucasian   | Prostate Adenocarcinoma                          | PRAD     | Bone              | PRAD     | Prostate         | 10       | Y       |                      |
| 77   | MO_1095 | 72  | M      | Caucasian   | Prostate Adenocarcinoma                          | PRAD     | Thoracic Epidural | PRAD     | Prostate         | 14       | Y       |                      |
| 78   | MO_1096 | 65  | M      | African Am. | Prostate Adenocarcinoma                          | PRAD     | Bone              | PRAD     | Prostate         | 95       | Y       |                      |
| 79   | MO_1097 | 57  | F      | Caucasian   | Bladder Urothelial Carcinoma                     | BLCA     | Liver             | BLCA     | Bladder          | 9        | Y       |                      |
| 80   | MO_1098 | 46  | M      | Caucasian   | Colon Adenocarcinoma                             | COAD     | Lung              | COLO     | Colon            | 28       | Y       |                      |
| 81   | MO_1099 | 45  | F      | Caucasian   | Bladder Squamous Cell Carcinoma                  | BLSC     | Liver             | BLCA     | Bladder          | 6        | Y       |                      |
| 82   | MO_1100 | 48  | M      | Caucasian   | Leiomyosarcoma                                   | LMS      | Paraspinal Mass   | SARC     | Kidney           | 11       | Y       |                      |
| 83   | MO_1102 | 34  | M      | Caucasian   | Thymic Squamous Carcinoma                        |          | Liver             | THYM     | Thymus           | 16       | Y       |                      |
| 84   | MO_1106 | 72  | M      | Caucasian   | Head and Neck Mucosal Melanoma                   | HNMUCM   | Cheek             | SKCM     | Sinus            | 48       | Y       |                      |
| 85   | MO_1107 | 46  | F      | Caucasian   | Breast Invasive Ductal Carcinoma                 | IDC      | Liver             | BRCA     | Breast           | 88       | Y       |                      |
| 86   | MO_1108 | 75  | F      | Caucasian   | Lung Adenocarcinoma                              | LUAD     | Lymph Node        | LUNG     | Lung             | 64       | Y       |                      |
| 87   | MO_1109 | 60  | M      | Caucasian   | Merkel Cell Carcinoma                            | MCC      | Chest Wall        | MISC     | Skin             | 21       | Y       |                      |
| 88   | MO_1111 | 54  | F      | Caucasian   | Lung Adenocarcinoma                              | LUAD     | Lymph Node        | LUNG     | Lung             | 17       | Y       |                      |
| 89   | MO_1112 | 55  | M      | Caucasian   | Prostate Adenocarcinoma                          | PRAD     | Bone              | PRAD     | Prostate         | 32       | Y       |                      |
| 90   | MO_1114 | 62  | M      | Caucasian   | Prostate Adenocarcinoma                          | PRAD     | Lymph Node        | PRAD     | Prostate         | 91       | Y       |                      |
| 91   | MO_1116 | 54  | M      | Caucasian   | Pancreatobiliary Ampullary Carcinoma             | PAMPCA   | Liver             | CHOL     | Ampulla of Vater | 44       | Y       |                      |
| 92   | MO_1117 | 53  | F      | Caucasian   | Hepatocellular Carcinoma                         | HCC      | Liver             | HCC      | Liver            | 70       | Y       |                      |
| 93   | MO_1118 | 73  | M      | Caucasian   | Prostate Neuroendocrine Carcinoma                | PRNE     | Liver             | PRAD     | Prostate         | 137      | Y       |                      |
| 94   | MO_1119 | 54  | M      | Caucasian   | Poorly Differentiated Non-Small Cell Lung Cancer | NSCLCPD  | Brain             | LUNG     | Lung             | 0        | N       |                      |
| 95   | MO_1123 | 77  | F      | Caucasian   | Mucinous Cystic Neoplasm                         | MCN      | Lung              | PAAD     | Pancreas         | 9        | Y       | Basal Cell Carcinoma |
| 96   | MO_1124 | 66  | M      | Caucasian   | Prostate Adenocarcinoma                          | PRAD     | Bladder           | PRAD     | Prostate         | 285      | Y       |                      |
| 97   | MO_1125 | 72  | M      | Caucasian   | Poorly Differentiated Non-Small Cell Lung Cancer | NSCLCPD  | Lymph Node        | LUNG     | Lung             | 48       | Y       |                      |
| 98   | MO_1126 | 55  | F      | Caucasian   | Breast Invasive Ductal Carcinoma                 | IDC      | Liver             | BRCA     | Breast           | 12       | Y       |                      |
| 99   | MO_1128 | 71  | M      | Caucasian   | Prostate Adenocarcinoma                          | PRAD     | Lymph Node        | PRAD     | Prostate         | 136      | Y       |                      |
| 100  | MO_1129 | 44  | F      | Caucasian   | Breast Invasive Ductal Carcinoma                 | IDC      | Liver             | BRCA     | Breast           | 141      | Y       |                      |
| 101  | MO_1130 | 56  | M      | Caucasian   | Prostate Adenocarcinoma                          | PRAD     | Bone              | PRAD     | Prostate         | 42       | Y       |                      |
| 102  | MO_1131 | 70  | M      | Caucasian   | Cutaneous Melanoma                               | SKCM     | Lymph Node        | SKCM     | Skin             | 16       | Y       |                      |
| 103  | MO_1132 | 60  | M      | Caucasian   | Prostate Adenocarcinoma                          | PRAD     | Bone              | PRAD     | Prostate         | 5        | Y       |                      |
| 104  | MO_1133 | 49  | F      | Caucasian   | Synovial Sarcoma                                 | SYNS     | Epidural          | SARC     | Unknown          | 51       | Y       |                      |
| 105  | MO_1135 | 47  | M      | Caucasian   | Bladder Urothelial Carcinoma                     | BLCA     | Rectus Muscle     | BLCA     | Bladder          | 12       | Y       |                      |

**SUPPLEMENTARY TABLE 1. DEMOGRAPHICS and CLINICAL DETAILS cont.**

| CASE | ID      | AGE | GENDER | POPULATION  | CANCER TYPE                                      | ONCOTREE |                 | ANALYSIS |                | INTERVAL | PRIOR   | OTHER CANCER HISTORY     |
|------|---------|-----|--------|-------------|--------------------------------------------------|----------|-----------------|----------|----------------|----------|---------|--------------------------|
|      |         |     |        |             |                                                  | CODE     | BIOPSY SITE     | COHORT   | PRIMARY SITE   | (mo)     | THERAPY |                          |
| 106  | MO_1136 | 35  | F      | Caucasian   | Fibrolamellar Carcinoma                          | FLC      | Chest Wall      | HCC      | Liver          | 36       | Y       |                          |
| 107  | MO_1137 | 66  | F      | Caucasian   | Uterine Leiomyosarcoma                           | ULMS     | Lung            | SARC     | Uterus         | 104      | Y       |                          |
| 108  | MO_1138 | 60  | F      | Caucasian   | High-Grade Serous Ovarian Cancer                 | HGSOC    | Pelvis          | OV       | Fallopian Tube | 0        | N       |                          |
| 109  | MO_1139 | 61  | M      | Caucasian   | Prostate Adenocarcinoma                          | PRAD     | Bone            | PRAD     | Prostate       | 106      | Y       |                          |
| 110  | MO_1140 | 72  | F      | African Am. | Gastrointestinal Stromal Tumor                   | GIST     | Paraspinal Mass | STAD     | Unknown        | 2        | Y       |                          |
| 111  | MO_1141 | 56  | M      | Caucasian   | Squamous Cell Carcinoma, NOS                     | SCCNOS   | Lung            | HNSC     | Unknown        | 20       | Y       |                          |
| 112  | MO_1142 | 72  | F      | Caucasian   | Clear Cell Carcinoma                             |          | Lung            |          | Tongue         | 161      | Y       | Clinoidal Meningioma     |
| 113  | MO_1146 | 72  | M      | Caucasian   | Cutaneous Melanoma                               | SKCM     | Subq Nodule     | SKCM     | Unknown        | 10       | Y       | Breast Ductal Carcinoma  |
| 114  | MO_1147 | 62  | F      | Caucasian   | Intrahepatic Cholangiocarcinoma                  | IHCH     | Liver           | CHOL     | Unknown        | 1        | N       |                          |
| 115  | MO_1148 | 64  | M      | Caucasian   | Leiomyosarcoma                                   | LMS      | Chest Wall      | SARC     | Penis          | 121      | Y       |                          |
| 116  | MO_1149 | 24  | F      | African Am. | Alveolar Soft Part Sarcoma                       | ASPS     | Lung            | SARC     | Psoas Muscle   | 74       | Y       |                          |
| 117  | MO_1150 | 54  | M      | Caucasian   | Lung Adenocarcinoma                              | LUAD     | Lymph Node      | LUNG     | Lung           | 39       | Y       |                          |
| 118  | MO_1152 | 43  | M      | Caucasian   | Extrahepatic Cholangiocarcinoma                  | EHCH     | Liver           | CHOL     | Gall Bladder   | 0        | N       |                          |
| 119  | MO_1153 | 70  | M      | Caucasian   | Bladder Urothelial Carcinoma                     | BLCA     | Liver           | BLCA     | Bladder        | 42       | Y       |                          |
| 120  | MO_1155 | 40  | M      | Caucasian   | Adenoid Cystic Carcinoma                         | ACYC     | Subq Nodule     | SECR     | Oropharynx     | 13       | Y       |                          |
| 121  | MO_1157 | 49  | F      | Caucasian   | Uterine Leiomyosarcoma                           | ULMS     | Retroperitoneum | SARC     | Uterus         | 17       | Y       |                          |
| 122  | MO_1158 | 64  | F      | Caucasian   | High-Grade Serous Ovarian Cancer                 | HGSOC    | Pelvic Mass     | OV       | Ovary          | 1        | N       |                          |
| 123  | MO_1159 | 54  | F      | Caucasian   | Breast Invasive Ductal Carcinoma                 | IDC      | Liver           | BRCA     | Breast         | 24       | Y       |                          |
| 124  | MO_1160 | 66  | M      | Caucasian   | Merkel Cell Carcinoma                            | MCC      | Liver           | MISC     | Skin           | 15       | Y       |                          |
| 125  | MO_1161 | 65  | M      | Caucasian   | Prostate Adenocarcinoma                          | PRAD     | Liver           | PRAD     | Prostate       | 16       | Y       |                          |
| 126  | MO_1162 | 62  | M      | Caucasian   | Prostate Adenocarcinoma                          | PRAD     | Peritoneum      | PRAD     | Prostate       | 106      | Y       |                          |
| 127  | MO_1163 | 52  | M      | Caucasian   | Poorly Differentiated Non-Small Cell Lung Cancer | NSCLCPD  | Liver           | LUNG     | Lung           | 20       | Y       |                          |
| 128  | MO_1164 | 51  | F      | Caucasian   | Renal Clear Cell Carcinoma                       | CCRCC    | Brain           | KDNY     | Kidney         | 18       | Y       |                          |
| 129  | MO_1165 | 32  | F      | Caucasian   | Uterine Leiomyosarcoma                           | ULMS     | Breast          | SARC     | Uterus         | 41       | Y       |                          |
| 130  | MO_1166 | 78  | M      | Caucasian   | Bladder Urothelial Carcinoma                     | BLCA     | Bone            | BLCA     | Bladder        | 1        | N       |                          |
| 131  | MO_1167 | 60  | F      | Caucasian   | Breast Invasive Ductal Carcinoma                 | IDC      | Liver           | BRCA     | Breast         | 214      | Y       | Basal Cell Carcinoma     |
| 132  | MO_1168 | 50  | M      | Caucasian   | Leiomyosarcoma                                   | LMS      | Liver           | SARC     | Unknown        | 27       | Y       | Bilateral Retinoblastoma |
| 133  | MO_1170 | 44  | M      | Caucasian   | Extrahepatic Cholangiocarcinoma                  | EHCH     | Peritoneum      | CHOL     | Perihilar      | 18       | Y       |                          |
| 134  | MO_1171 | 42  | M      | Caucasian   | Teratoma with Malignant Transformation           | TMT      | Lymph Node      | TGCT     | Testicle       | 6        | Y       |                          |
| 135  | MO_1172 | 55  | F      | Caucasian   | Pancreatic Adenocarcinoma                        | PAAD     | Lung            | PAAD     | Pancreas       | 45       | Y       |                          |
| 136  | MO_1175 | 69  | M      | Caucasian   | Adenocarcinoma, NOS                              | ADNOS    | Liver           | MISC     | Unknown        | 26       | Y       |                          |
| 137  | MO_1176 | 56  | M      | Caucasian   | Prostate Adenocarcinoma                          | PRAD     | Lymph Node      | PRAD     | Prostate       | 1        | N       |                          |
| 138  | MO_1177 | 62  | M      | Caucasian   | Lung Squamous Cell Carcinoma                     | LUSC     | Pleura          | LUNG     | Lung           | 7        | Y       |                          |
| 139  | MO_1178 | 61  | F      | Caucasian   | Breast Invasive Ductal Carcinoma                 | IDC      | Lymph Node      | BRCA     | Breast         | 52       | Y       |                          |
| 140  | MO_1179 | 75  | M      | Caucasian   | Prostate Adenocarcinoma                          | PRAD     | Bone            | PRAD     | Prostate       | 61       | Y       |                          |
| 141  | MO_1180 | 58  | M      | Caucasian   | Extraskeletal Myxoid Chondrosarcoma              | EMCHS    | Gluteus Muscle  | SARC     | Thigh          | 16       | Y       |                          |

**SUPPLEMENTARY TABLE 1. DEMOGRAPHICS and CLINICAL DETAILS cont.**

| CASE | ID      | AGE | GENDER | POPULATION  | CANCER TYPE                                      | ONCOTREE |                       | ANALYSIS |              | INTERVAL<br>(mo) | PRIOR<br>THERAPY | OTHER CANCER HISTORY |
|------|---------|-----|--------|-------------|--------------------------------------------------|----------|-----------------------|----------|--------------|------------------|------------------|----------------------|
|      |         |     |        |             |                                                  | CODE     | BIOPSY SITE           | COHORT   | PRIMARY SITE |                  |                  |                      |
| 142  | MO_1181 | 62  | F      | Caucasian   | Uterine Leiomyosarcoma                           | ULMS     | Abdomen               | SARC     | Uterus       | 176              | Y                |                      |
| 143  | MO_1182 | 52  | F      | African Am. | Leiomyosarcoma                                   | LMS      | Gluteal Mass          | SARC     | Unknown      | 44               | Y                |                      |
| 144  | MO_1183 | 69  | F      | Caucasian   | Cutaneous Melanoma                               | SKCM     | Subq Nodule (Arm)     | SKCM     | Skin (Lip)   | 43               | Y                |                      |
| 145  | MO_1184 | 72  | M      | Caucasian   | Prostate Adenocarcinoma                          | PRAD     | Liver                 | PRAD     | Prostate     | 47               | Y                |                      |
| 146  | MO_1185 | 58  | F      | Caucasian   | Breast Invasive Lobular Carcinoma                | ILC      | Peritoneal Fluid      | BRCA     | Breast       | 195              | Y                |                      |
| 147  | MO_1187 | 64  | F      | Caucasian   | Oral Cavity Squamous Cell Carcinoma              | OCSC     | Liver                 | HNSC     | Oral         | 17               | Y                |                      |
| 148  | MO_1188 | 62  | F      | Caucasian   | Breast Invasive Ductal Carcinoma                 | IDC      | Lymph Node            | BRCA     | Breast       | 191              | Y                |                      |
| 149  | MO_1189 | 67  | F      | Caucasian   | Poorly Differentiated Non-Small Cell Lung Cancer | NSCLCPD  | Lymph Node            | LUNG     | Lung         | 4                | Y                |                      |
| 150  | MO_1190 | 66  | F      | Caucasian   | Breast Invasive Lobular Carcinoma                | ILC      | Bladder               | BRCA     | Breast       | 106              | Y                |                      |
| 151  | MO_1192 | 62  | M      | African Am. | Prostate Adenocarcinoma                          | PRAD     | Lymph Node            | PRAD     | Prostate     | 73               | Y                |                      |
| 152  | MO_1193 | 28  | F      | Caucasian   | Low-Grade Serous Ovarian Cancer                  | LGSOC    | Lung                  | OV       | Ovary        | 4                | Y                |                      |
| 153  | MO_1194 | 60  | F      | Caucasian   | Lung Adenocarcinoma                              | LUAD     | Chest Wall            | LUNG     | Lung         | 39               | Y                |                      |
| 154  | MO_1195 | 56  | F      | Caucasian   | Adenocarcinoma, NOS                              | ADNOS    | Lymph Node            | BRCA     | Breast       | 0                | N                |                      |
| 155  | MO_1196 | 34  | M      | Caucasian   | Gastrointestinal Stromal Tumor                   | GIST     | Liver                 | STAD     | Stomach      | 13               | Y                |                      |
| 156  | MO_1197 | 59  | M      | Caucasian   | Squamous Cell Carcinoma, NOS                     | SCCNOS   | Lymph Node            | HNSC     | Unknown      | 9                | Y                |                      |
| 157  | MO_1198 | 64  | M      | Caucasian   | Bladder Urothelial Carcinoma                     | BLCA     | Liver                 | BLCA     | Bladder      | 15               | Y                |                      |
| 158  | MO_1200 | 67  | M      | Caucasian   | Prostate Adenocarcinoma                          | PRAD     | Lymph Node            | PRAD     | Prostate     | 131              | Y                |                      |
| 159  | MO_1201 | 62  | M      | Caucasian   | Prostate Adenocarcinoma                          | PRAD     | Bone                  | PRAD     | Prostate     | 12               | Y                |                      |
| 160  | MO_1202 | 70  | M      | Caucasian   | Prostate Adenocarcinoma                          | PRAD     | Liver                 | PRAD     | Prostate     | 24               | Y                |                      |
| 161  | MO_1203 | 47  | F      | Caucasian   | Intrahepatic Cholangiocarcinoma                  | IHCH     | Subcut. Abdomen       | CHOL     | Liver        | 8                | Y                |                      |
| 162  | MO_1204 | 46  | F      | Caucasian   | Urachal Adenocarcinoma                           | UA       | Subcut. Periumbilical | BLCA     | Urachus      | 64               | Y                |                      |
| 163  | MO_1206 | 54  | F      | Caucasian   | Lung Squamous Cell Carcinoma                     | LUSC     | Liver                 | LUNG     | Lung         | 14               | Y                |                      |
| 164  | MO_1208 | 61  | M      | Caucasian   | Undifferentiated Pleomorphic Sarcoma/Malignant f | MFH      | Acetabulum            | SARC     | Thigh        | 20               | Y                |                      |
| 165  | MO_1209 | 61  | M      | Caucasian   | Clear Cell Carcinoma of the Lung                 | CCLC     | Lung Nodule           | LUNG     | Lung         | 51               | Y                |                      |
| 166  | MO_1210 | 19  | F      | Caucasian   | Hepatocellular Carcinoma                         | HCC      | Peritoneum            | HCC      | Liver        | 9                | Y                |                      |
| 167  | MO_1211 | 23  | M      | African Am. | Desmoplastic Small-Round-Cell Tumor              | DSRCT    | Liver                 | SARC     | Pelvis       | 16               | Y                |                      |
| 168  | MO_1213 | 43  | F      | Caucasian   | Breast Invasive Ductal Carcinoma                 | IDC      | Liver                 | BRCA     | Breast       | 8                | Y                |                      |
| 169  | MO_1214 | 78  | M      | Caucasian   | Renal Cell Carcinoma                             | RCC      | Bone                  | KDNY     | Kidney       | 0                | N                | Prostate Carcinoma   |
| 170  | MO_1215 | 65  | M      | Caucasian   | Prostate Neuroendocrine Carcinoma                | PRNE     | Perirectal Mass       | PRAD     | Prostate     | 133              | Y                |                      |
| 171  | MO_1217 | 67  | M      | Caucasian   | Undifferentiated Malignant Neoplasm              | UDMN     | Lymph Node            | MISC     | Unknown      | 2                | N                |                      |
| 172  | MO_1219 | 67  | M      | Caucasian   | Prostate Adenocarcinoma                          | PRAD     | Bone                  | PRAD     | Prostate     | 20               | Y                |                      |
| 173  | MO_1220 | 26  | M      | Caucasian   | Desmoplastic Small-Round-Cell Tumor              | DSRCT    | Lymph Node            | SARC     | Pleura       | 46               | Y                |                      |
| 174  | MO_1221 | 59  | M      | Caucasian   | Prostate Adenocarcinoma                          | PRAD     | Bone                  | PRAD     | Prostate     | 102              | Y                |                      |
| 175  | MO_1222 | 46  | M      | Caucasian   | Extraskeletal Myxoid Chondrosarcoma              | EMCHS    | Thigh                 | SARC     | Thigh        | 149              | Y                |                      |
| 176  | MO_1223 | 62  | F      | Caucasian   | Squamous Cell Carcinoma, NOS                     | SCCNOS   | Lymph Node            | HNSC     | Unknown      | 2                | Y                |                      |
| 177  | MO_1224 | 69  | M      | Caucasian   | Urethral Urothelial Carcinoma                    | UCU      | Lymph Node            | BLCA     | Urethra      | 24               | Y                |                      |

**SUPPLEMENTARY TABLE 1. DEMOGRAPHICS and CLINICAL DETAILS cont.**

| CASE | ID      | AGE | GENDER | POPULATION  | CANCER TYPE                               | ONCOTREE |                   | ANALYSIS |              | INTERVAL | PRIOR   | OTHER CANCER HISTORY       |
|------|---------|-----|--------|-------------|-------------------------------------------|----------|-------------------|----------|--------------|----------|---------|----------------------------|
|      |         |     |        |             |                                           | CODE     | BIOPSY SITE       | COHORT   | PRIMARY SITE | (mo)     | THERAPY |                            |
| 178  | MO_1226 | 48  | F      | Caucasian   | Angiosarcoma                              | ANGS     | Chest Wall Nodule | SARC     | Neck         | 114      | Y       | Hodgkin Lymph. / Breast Ca |
| 179  | MO_1227 | 58  | F      | Caucasian   | Breast Invasive Lobular Carcinoma         | ILC      | Bone              | BRCA     | Breast       | 74       | Y       |                            |
| 180  | MO_1228 | 54  | F      | Caucasian   | Skin Adnexal Carcinoma                    | SKAC     | Parotid           | SECR     | Skin (Cheek) | 15       | Y       |                            |
| 181  | MO_1229 | 50  | M      | Caucasian   | Myxoid/Round-Cell Liposarcoma             | MRLS     | Thigh             | SARC     | Thigh        | 22       | Y       |                            |
| 182  | MO_1230 | 64  | F      | Caucasian   | Breast Invasive Ductal Carcinoma          | IDC      | Liver             | BRCA     | Breast       | 210      | Y       |                            |
| 183  | MO_1231 | 45  | F      | Caucasian   | Stomach Adenocarcinoma                    | STAD     | Pelvic Mass       | STAD     | Stomach      | 20       | Y       |                            |
| 184  | MO_1232 | 65  | M      | Caucasian   | Prostate Adenocarcinoma                   | PRAD     | Chest Wall        | PRAD     | Prostate     | 46       | Y       |                            |
| 185  | MO_1233 | 44  | F      | Caucasian   | Adenoid Cystic Carcinoma                  | ACYC     | Liver             | SECR     | Palate       | 22       | Y       |                            |
| 186  | MO_1236 | 59  | M      | Caucasian   | Lung Adenocarcinoma                       | LUAD     | Lymph Node        | LUNG     | Lung         | 6        | Y       |                            |
| 187  | MO_1237 | 43  | F      | South Asian | Breast Invasive Ductal Carcinoma          | IDC      | Liver             | BRCA     | Breast       | 15       | Y       |                            |
| 188  | MO_1239 | 58  | F      | Caucasian   | Breast Invasive Ductal Carcinoma          | IDC      | Liver             | BRCA     | Breast       | 50       | Y       |                            |
| 189  | MO_1240 | 66  | M      | Caucasian   | Prostate Adenocarcinoma                   | PRAD     | Bone              | PRAD     | Prostate     | 105      | Y       |                            |
| 190  | MO_1241 | 75  | M      | Caucasian   | Prostate Adenocarcinoma                   | PRAD     | Liver             | PRAD     | Prostate     | 5        | Y       |                            |
| 191  | MO_1244 | 58  | M      | Caucasian   | Prostate Adenocarcinoma                   | PRAD     | Liver             | PRAD     | Prostate     | 15       | Y       |                            |
| 192  | MO_1245 | 47  | F      | Caucasian   | Uterine Leiomyosarcoma                    | ULMS     | Lung              | SARC     | Uterus       | 76       | Y       |                            |
| 193  | MO_1247 | 46  | F      | Caucasian   | Breast Invasive Ductal Carcinoma          | IDC      | Liver             | BRCA     | Breast       | 128      | Y       |                            |
| 194  | MO_1248 | 69  | F      | Caucasian   | Serous Ovarian Cancer                     | SOC      | Omentum           | OV       | Ovary        | 0        | N       | Breast Ductal Carcinoma    |
| 195  | MO_1249 | 70  | M      | Caucasian   | Prostate Adenocarcinoma                   | PRAD     | Lymph Node        | PRAD     | Prostate     | 229      | Y       |                            |
| 196  | MO_1250 | 53  | M      | Caucasian   | Lung Adenocarcinoma                       | LUAD     | Lymph Node        | LUNG     | Lung         | 9        | Y       |                            |
| 197  | MO_1251 | 45  | M      | Caucasian   | Renal Clear Cell Carcinoma                | CCRCC    | Lung              | SARC     | Kidney       | 60       | Y       |                            |
| 198  | MO_1252 | 45  | M      | Caucasian   | Dedifferentiated Liposarcoma              | DDL5     | Thigh             | SARC     | Thigh        | 45       | Y       |                            |
| 199  | MO_1253 | 49  | M      | Caucasian   | Lung Adenocarcinoma                       | LUAD     | Hilum             | LUNG     | Lung         | 8        | Y       |                            |
| 200  | MO_1256 | 42  | M      | Caucasian   | Adrenocortical Carcinoma                  | ACC      | Lymph Node        | ACC      | Adrenal      | 12       | Y       |                            |
| 201  | MO_1260 | 61  | M      | Caucasian   | Prostate Adenocarcinoma                   | PRAD     | Lymph Node        | PRAD     | Prostate     | 21       | Y       |                            |
| 202  | MO_1262 | 53  | M      | African Am. | Prostate Adenocarcinoma                   | PRAD     | Lymph Node        | PRAD     | Prostate     | 68       | Y       |                            |
| 203  | MO_1263 | 65  | M      | Caucasian   | Prostate Adenocarcinoma                   | PRAD     | Lymph Node        | PRAD     | Prostate     | 117      | Y       |                            |
| 204  | MO_1264 | 22  | F      | Caucasian   | Fibrolamellar Carcinoma                   | FLC      | Abdom. Nodule     | HCC      | Liver        | 47       | Y       |                            |
| 205  | MO_1265 | 54  | F      | Caucasian   | Colon Adenocarcinoma                      | COAD     | Liver             | COLO     | Colorectal   | 62       | Y       | Breast Ductal Carcinoma    |
| 206  | MO_1266 | 58  | F      | Caucasian   | Breast Invasive Ductal Carcinoma          | IDC      | Lymph Node        | BRCA     | Breast       | 117      | Y       |                            |
| 207  | MO_1267 | 63  | F      | Caucasian   | Breast Invasive Ductal Carcinoma          | IDC      | Skin Punch        | BRCA     | Breast       | 13       | Y       | Basal Cell Carcinoma       |
| 208  | MO_1268 | 52  | F      | Caucasian   | Mullerian Poorly Differentiated Carcinoma |          | Retroperitoneum   | MISC     | Mullerian    | 1        | N       |                            |
| 209  | MO_1269 | 46  | F      | Caucasian   | Breast Invasive Ductal Carcinoma          | IDC      | Sternal Mass      | BRCA     | Breast       | 142      | Y       |                            |
| 210  | MO_1271 | 63  | F      | Caucasian   | Breast Invasive Ductal Carcinoma          | IDC      | Lymph Node        | BRCA     | Breast       | 150      | Y       |                            |
| 211  | MO_1272 | 42  | M      | Caucasian   | Chromophobe Renal Cell Carcinoma          | CHRCC    | Lymph Node        | KDNY     | Kidney       | 70       | Y       |                            |
| 212  | MO_1274 | 50  | M      | Caucasian   | Small Cell Carcinoma of Unknown Primary   | SCUP     | Liver             | MISC     | Unknown      | 10       | Y       |                            |
| 213  | MO_1276 | 41  | F      | Caucasian   | Breast Invasive Ductal Carcinoma          | IDC      | Lung              | BRCA     | Breast       | 55       | Y       |                            |

**SUPPLEMENTARY TABLE 1. DEMOGRAPHICS and CLINICAL DETAILS cont.**

| CASE | ID      | AGE | GENDER | POPULATION  | CANCER TYPE                                      | ONCOTREE |                      | ANALYSIS |                    | INTERVAL | PRIOR   | OTHER CANCER HISTORY |
|------|---------|-----|--------|-------------|--------------------------------------------------|----------|----------------------|----------|--------------------|----------|---------|----------------------|
|      |         |     |        |             |                                                  | CODE     | BIOPSY SITE          | COHORT   | PRIMARY SITE       | (mo)     | THERAPY |                      |
| 214  | MO_1277 | 54  | M      | Caucasian   | Prostate Adenocarcinoma                          | PRAD     | Bone                 | PRAD     | Prostate           | 101      | Y       |                      |
| 215  | MO_1278 | 49  | F      | Caucasian   | Perivascular Epithelioid Cell Tumor              | PECOMA   | Liver                | MISC     | Unknown            | 4        | Y       |                      |
| 216  | MO_1279 | 65  | F      | African Am. | Colon Adenocarcinoma                             | COAD     | Lymph Node           | COLO     | Colorectal         | 35       | Y       |                      |
| 217  | MO_1283 | 35  | F      | Caucasian   | Embryonal Rhabdomyosarcoma                       | ERMS     | Pelvic Mass          | SARC     | Cervix             | 7        | Y       |                      |
| 218  | MO_1284 | 61  | F      | Caucasian   | Lung Adenocarcinoma                              | LUAD     | Infraclavicular Mass | MISC     | Unknown            | 2        | N       |                      |
| 219  | MO_1285 | 28  | F      | Caucasian   | Poorly Differentiated Non-Small Cell Lung Cancer | NSCLCPD  | Lymph Node           | MISC     | Unknown            | 2        | N       |                      |
| 220  | MO_1286 | 58  | F      | Caucasian   | Lung Squamous Cell Carcinoma                     | LUSC     | Lymph Node           | LUNG     | Lung               | 21       | Y       |                      |
| 221  | MO_1287 | 56  | F      | Caucasian   | Breast Invasive Ductal Carcinoma                 | IDC      | Lymph Node           | BRCA     | Breast             | 34       | Y       |                      |
| 222  | MO_1288 | 77  | F      | Caucasian   | Breast Invasive Ductal Carcinoma                 | IDC      | Liver                | BRCA     | Breast             | 168      | Y       |                      |
| 223  | MO_1289 | 49  | F      | Caucasian   | Breast Invasive Ductal Carcinoma                 | IDC      | Chest Wall           | BRCA     | Breast             | 80       | Y       |                      |
| 224  | MO_1290 | 54  | M      | Caucasian   | Small Cell Bladder Cancer                        | SCBC     | Lymph Node           | BLCA     | Bladder            | 6        | Y       |                      |
| 225  | MO_1292 | 35  | F      | African Am. | Breast Invasive Ductal Carcinoma                 | IDC      | Liver                | BRCA     | Breast             | 0        | N       |                      |
| 226  | MO_1294 | 61  | F      | Caucasian   | Lung Adenocarcinoma                              | LUAD     | Lymph Node           | LUNG     | Lung               | 8        | Y       |                      |
| 227  | MO_1295 | 23  | M      | Caucasian   | Desmoplastic Small-Round-Cell Tumor              | DSRCT    | Abdom. Mass          | SARC     | Unknown            | 12       | Y       |                      |
| 228  | MO_1296 | 68  | F      | Caucasian   | Pancreatobiliary Ampullary Carcinoma             | PAMPCA   | Liver                | CHOL     | Pancreaticobiliary | 13       | Y       |                      |
| 229  | MO_1297 | 67  | M      | Caucasian   | Neuroendocrine Carcinoma of the Stomach          |          | Liver                | STAD     | Stomach            | 179      | Y       |                      |
| 230  | MO_1298 | 64  | F      | African Am. | Breast Invasive Ductal Carcinoma                 | IDC      | Chest Wall           | BRCA     | Breast             | 141      | Y       |                      |
| 231  | MO_1300 | 75  | F      | Caucasian   | Breast Invasive Lobular Carcinoma                | ILC      | Bladder              | BRCA     | Breast             | 44       | Y       |                      |
| 232  | MO_1301 | 42  | F      | Caucasian   | Breast Invasive Ductal Carcinoma                 | IDC      | Brain                | BRCA     | Breast             | 16       | Y       |                      |
| 233  | MO_1302 | 44  | F      | Caucasian   | Breast Invasive Ductal Carcinoma                 | IDC      | Peritoneal Fluid     | BRCA     | Breast             | 61       | Y       |                      |
| 234  | MO_1304 | 67  | M      | Caucasian   | Cutaneous Squamous Cell Carcinoma                | CSCC     | Subq                 | HNSC     | Head               | 21       | Y       |                      |
| 235  | MO_1305 | 51  | F      | Caucasian   | Inflammatory Breast Cancer                       | IBC      | Liver                | BRCA     | Breast             | 79       | Y       |                      |
| 236  | MO_1306 | 38  | M      | Caucasian   | Yolk Sac Tumor                                   | TYST     | Liver                | TGCT     | Testes             | 108      | Y       |                      |
| 237  | MO_1307 | 69  | M      | Caucasian   | Cutaneous Squamous Cell Carcinoma                | CSCC     | Neck                 | HNSC     | Head               | 14       | Y       | Prostate Carcinoma   |
| 238  | MO_1309 | 61  | M      | Caucasian   | Oropharynx Squamous Cell Carcinoma               | OPHSC    | Neck Mass            | HNSC     | Tonsil             | 14       | Y       |                      |
| 239  | MO_1310 | 62  | F      | Caucasian   | Leiomyosarcoma                                   | LMS      | Liver                | SARC     | Vena Cava          | 88       | Y       |                      |
| 240  | MO_1312 | 61  | M      | Caucasian   | Extrahepatic Cholangiocarcinoma                  | EHCH     | Liver                | CHOL     | Bile Duct          | 14       | Y       |                      |
| 241  | MO_1313 | 65  | M      | Caucasian   | Soft Tissue Myoepithelial Carcinoma              | STMYEC   | Liver                | SECR     | Foot               | 46       | Y       |                      |
| 242  | MO_1315 | 54  | F      | Caucasian   | Lung Squamous Cell Carcinoma                     | LUSC     | Lung                 | LUNG     | Lung               | 9        | Y       |                      |
| 243  | MO_1316 | 70  | M      | Caucasian   | Prostate Adenocarcinoma                          | PRAD     | Lymph Node           | PRAD     | Prostate           | 182      | Y       |                      |
| 244  | MO_1317 | 58  | F      | Caucasian   | Breast Invasive Ductal Carcinoma                 | IDC      | Lymph Node           | BRCA     | Breast             | 74       | Y       |                      |
| 245  | MO_1318 | 63  | F      | Caucasian   | Breast Invasive Ductal Carcinoma                 | IDC      | Lymph Node           | BRCA     | Breast             | 45       | Y       |                      |
| 246  | MO_1319 | 61  | F      | Caucasian   | Gastrointestinal Stromal Tumor                   | GIST     | Abdom. Mass          | STAD     | Unknown            | 46       | Y       |                      |
| 247  | MO_1320 | 44  | F      | South Asian | Breast Invasive Ductal Carcinoma                 | IDC      | Skin Punch           | BRCA     | Breast             | 12       | Y       |                      |
| 248  | MO_1322 | 27  | F      | Caucasian   | Adrenocortical Carcinoma                         | ACC      | Lung                 | ACC      | Adrenal            | 17       | Y       |                      |
| 249  | MO_1323 | 65  | F      | Caucasian   | Breast Invasive Ductal Carcinoma                 | IDC      | Subq Chest Wall      | BRCA     | Breast             | 93       | Y       |                      |

**SUPPLEMENTARY TABLE 1. DEMOGRAPHICS and CLINICAL DETAILS cont.**

| CASE | ID      | AGE | GENDER | POPULATION  | CANCER TYPE                                      | ONCOTREE |                  | ANALYSIS |               | INTERVAL | PRIOR   | OTHER CANCER HISTORY |
|------|---------|-----|--------|-------------|--------------------------------------------------|----------|------------------|----------|---------------|----------|---------|----------------------|
|      |         |     |        |             |                                                  | CODE     | BIOPSY SITE      | COHORT   | PRIMARY SITE  | (mo)     | THERAPY |                      |
| 250  | MO_1324 | 57  | F      | Caucasian   | Breast Invasive Ductal Carcinoma                 | IDC      | Liver            | BRCA     | Breast        | 108      | Y       |                      |
| 251  | MO_1325 | 54  | M      | Caucasian   | Lung Adenocarcinoma                              | LUAD     | Liver            | LUNG     | Lung          | 25       | Y       |                      |
| 252  | MO_1328 | 78  | M      | Caucasian   | Penile Squamous Cell Carcinoma                   | PSCC     | Lymph Node       | HNSC     | Penis         | >13      | Y       |                      |
| 253  | MO_1329 | 59  | F      | Caucasian   | Myxoid Chondrosarcoma                            | MYCHS    | Shoulder Mass    | SARC     | Humerus       | 11       | Y       |                      |
| 254  | MO_1330 | 67  | F      | Caucasian   | Breast Invasive Ductal Carcinoma                 | IDC      | Sternal Mass     | BRCA     | Breast        | 372      | Y       |                      |
| 255  | MO_1331 | 68  | F      | Caucasian   | Oral Cavity Squamous Cell Carcinoma              | OCSC     | Lung             | HNSC     | Tongue        | 16       | Y       |                      |
| 256  | MO_1333 | 34  | M      | Caucasian   | Embryonal Carcinoma                              | EMBCA    | Lymph Node       | TGCT     | Testes        | 128      | Y       |                      |
| 257  | MO_1335 | 46  | F      | Caucasian   | Breast Invasive Ductal Carcinoma                 | IDC      | Liver            | BRCA     | Breast        | 58       | Y       |                      |
| 258  | MO_1336 | 75  | M      | Caucasian   | Prostate Adenocarcinoma                          | PRAD     | Bone             | PRAD     | Prostate      | 204      | Y       |                      |
| 259  | MO_1337 | 61  | M      | Caucasian   | Prostate Adenocarcinoma                          | PRAD     | Liver            | PRAD     | Prostate      | 18       | Y       |                      |
| 260  | MO_1338 | 43  | M      | Caucasian   | Intrahepatic Cholangiocarcinoma                  | IHCH     | Liver            | CHOL     | Bile Duct     | 5        | Y       |                      |
| 261  | MO_1339 | 78  | M      | Caucasian   | Prostate Adenocarcinoma                          | PRAD     | Lymph Node       | PRAD     | Prostate      | 11       | Y       |                      |
| 262  | MO_1340 | 53  | M      | Caucasian   | Signet Ring Cell Carcinoma of the Stomach        | SSRCC    | Peritoneal Fluid | STAD     | Stomach       | 26       | Y       |                      |
| 263  | MO_1341 | 31  | F      | African Am. | Extrahepatic Cholangiocarcinoma                  | EHCH     | Abdom. Mass      | CHOL     | Bile Duct     | 15       | Y       |                      |
| 264  | MO_1342 | 62  | F      | Caucasian   | Adenocarcinoma, NOS                              | ADNOS    | Bone             | MISC     | Unknown       | 1        | N       |                      |
| 265  | MO_1343 | 53  | M      | Caucasian   | Oral Cavity Squamous Cell Carcinoma              | OCSC     | Lung             | HNSC     | Tongue        | 58       | Y       |                      |
| 266  | MO_1344 | 57  | M      | Caucasian   | Synovial Sarcoma                                 | SYNS     | Pleural Mass     | SARC     | Lung          | 24       | Y       |                      |
| 267  | MO_1345 | 35  | M      | Caucasian   | Oral Cavity Squamous Cell Carcinoma              | OCSC     | Neck Mass        | HNSC     | Tongue        | 9        | Y       |                      |
| 268  | MO_1346 | 57  | M      | Caucasian   | Soft Tissue Myoepithelial Carcinoma              | STMIEC   | Lymph Node       | SECR     | Forearm       | 9        | Y       |                      |
| 269  | MO_1347 | 46  | M      | Caucasian   | Extrahepatic Cholangiocarcinoma                  | EHCH     | Lymph Node       | CHOL     | Bile Duct     | 11       | Y       | Ampullary Carcinoma  |
| 270  | MO_1355 | 65  | F      | Caucasian   | Breast Invasive Ductal Carcinoma                 | IDC      | Liver            | BRCA     | Breast        | 180      | Y       |                      |
| 271  | MO_1357 | 52  | M      | Caucasian   | Cutaneous Melanoma                               | SKCM     | Back             | SKCM     | Skin          | 155      | Y       |                      |
| 272  | MO_1359 | 77  | F      | Caucasian   | Breast Invasive Ductal Carcinoma                 | IDC      | Liver            | BRCA     | Breast        | 32       | Y       |                      |
| 273  | MO_1360 | 73  | M      | African Am. | Salivary Duct Carcinoma                          | SDCA     | Subq Nodule      | SECR     | Parotid Gland | 4        | Y       |                      |
| 274  | MO_1361 | 55  | M      | Caucasian   | Bladder Urothelial Carcinoma                     | BLCA     | Omentum          | BLCA     | Bladder       | >14      | Y       | Renal Cell Carcinoma |
| 275  | MO_1362 | 59  | M      | Caucasian   | Oropharynx Squamous Cell Carcinoma               | OPHSC    | Lung             | HNSC     | Tonsil        | 47       | Y       |                      |
| 276  | MO_1363 | 55  | F      | Caucasian   | Poorly Differentiated Carcinoma, NOS             | PDC      | Lymph Node       | MISC     | Unknown       | 7        | Y       |                      |
| 277  | MO_1364 | 56  | F      | Caucasian   | Breast Invasive Ductal Carcinoma                 | IDC      | Liver            | BRCA     | Breast        | 28       | Y       |                      |
| 278  | MO_1366 | 32  | M      | Caucasian   | Cutaneous Melanoma                               | SKCM     | Abdom. Wall      | SKCM     | Skin          | 192      | Y       |                      |
| 279  | MO_1367 | 39  | M      | Caucasian   | Oral Cavity Squamous Cell Carcinoma              | OCSC     | Lymph Node       | HNSC     | Tongue        | 23       | Y       |                      |
| 280  | MO_1369 | 65  | F      | Caucasian   | Intrahepatic Cholangiocarcinoma                  | IHCH     | Lung             | CHOL     | Unknown       | 40       | Y       |                      |
| 281  | MO_1370 | 24  | F      | Caucasian   | Undifferentiated Pleomorphic Sarcoma/Malignant f | MFH      | Thigh Mass       | SARC     | Thigh         | 38       | Y       |                      |
| 282  | MO_1371 | 39  | M      | Caucasian   | Granular Cell Tumor                              | GCT      | Scapular Mass    | MISC     | Testes        | 40       | Y       |                      |
| 283  | MO_1372 | 73  | F      | Caucasian   | Mullerian Adenocarcinoma                         |          | Abdom. Wall      | MISC     | Unknown       | 24       | Y       |                      |
| 284  | MO_1373 | 69  | M      | Caucasian   | Oral Cavity Squamous Cell Carcinoma              | OCSC     | Lung             | HNSC     | Tongue        | 240      | Y       |                      |
| 285  | MO_1374 | 50  | M      | Caucasian   | Cutaneous Melanoma                               | SKCM     | Breast           | SKCM     | Skin          | 70       | Y       |                      |



**SUPPLEMENTARY TABLE 1. DEMOGRAPHICS and CLINICAL DETAILS cont.**

| CASE | ID      | AGE | GENDER | POPULATION  | CANCER TYPE                                      | ONCOTREE |                   | ANALYSIS |                     | INTERVAL | PRIOR   | OTHER CANCER HISTORY    |
|------|---------|-----|--------|-------------|--------------------------------------------------|----------|-------------------|----------|---------------------|----------|---------|-------------------------|
|      |         |     |        |             |                                                  | CODE     | BIOPSY SITE       | COHORT   | PRIMARY SITE        | (mo)     | THERAPY |                         |
| 286  | MO_1375 | 50  | M      | Caucasian   | Esophageal Adenocarcinoma                        | ESCA     | Liver             | ESCA     | Esophagus           | 11       | Y       |                         |
| 287  | MO_1376 | 73  | F      | Caucasian   | Extrahepatic Cholangiocarcinoma                  | EHCH     | Liver             | CHOL     | Gall Bladder        | 8        | Y       |                         |
| 288  | MO_1377 | 53  | M      | Caucasian   | Adrenocortical Carcinoma                         | ACC      | Liver             | ACC      | Adrenal             | 151      | Y       |                         |
| 289  | MO_1378 | 52  | F      | Caucasian   | Serous Ovarian Cancer                            | SOC      | Lymph Node        | OV       | Ovary               | 23       | Y       |                         |
| 290  | MO_1379 | 69  | F      | Caucasian   | Adenocarcinoma, NOS                              | ADNOS    | Abdom. Mass       | MISC     | Unknown             | 36       | Y       |                         |
| 291  | MO_1380 | 67  | M      | Caucasian   | Esophageal Adenocarcinoma                        | ESCA     | Liver             | ESCA     | Esophagus           | 19       | Y       |                         |
| 292  | MO_1381 | 55  | M      | Caucasian   | Extraskeletal Myxoid Chondrosarcoma              | EMCHS    | Lung              | SARC     | Thigh               | 252      | Y       |                         |
| 293  | MO_1382 | 57  | F      | Caucasian   | Synovial Sarcoma                                 | SYNS     | Lung              | SARC     | Buttock             | 26       | Y       |                         |
| 294  | MO_1383 | 58  | F      | Caucasian   | Adenocarcinoma, NOS                              | ADNOS    | Liver             | MISC     | Unknown             | 1        | N       |                         |
| 295  | MO_1384 | 59  | F      | Caucasian   | Breast Invasive Ductal Carcinoma                 | IDC      | Bone              | BRCA     | Breast              | 60       | Y       |                         |
| 296  | MO_1385 | 49  | M      | Caucasian   | Adenoid Cystic Carcinoma                         | ACYC     | Submandible       | SECR     | Submandibular Gland | 140      | Y       | Melanoma / Pap. Thyroid |
| 297  | MO_1386 | 49  | F      | Caucasian   | Breast Invasive Ductal Carcinoma                 | IDC      | Skin              | BRCA     | Breast              | 16       | Y       |                         |
| 298  | MO_1387 | 39  | F      | Caucasian   | Breast Invasive Ductal Carcinoma                 | IDC      | Bone              | BRCA     | Breast              | 32       | Y       |                         |
| 299  | MO_1388 | 44  | M      | Caucasian   | Extrahepatic Cholangiocarcinoma                  | EHCH     | Brain             | CHOL     | Bile Duct           | 10       | Y       |                         |
| 300  | MO_1390 | 40  | F      | African Am. | Adenoid Cystic Carcinoma                         | ACYC     | Brain             | SECR     | Skull Base          | 28       | Y       |                         |
| 301  | MO_1391 | 47  | M      | Caucasian   | Myxoid/Round-Cell Liposarcoma                    | MRLS     | Mesenteric Mass   | SARC     | Thigh               | 49       | Y       |                         |
| 302  | MO_1393 | 62  | F      | Caucasian   | Serous Ovarian Cancer                            | SOC      | Liver             | OV       | Ovary               | 33       | Y       |                         |
| 303  | MO_1394 | 52  | F      | Caucasian   | High-Grade Sarcoma                               |          | Retroperitoneum   | SARC     | Retroperitoneum     | 53       | Y       |                         |
| 304  | MO_1395 | 58  | F      | Caucasian   | Esophageal Adenocarcinoma                        | ESCA     | Liver             | ESCA     | Esophagus           | 1        | N       |                         |
| 305  | MO_1396 | 68  | F      | Caucasian   | Anaplastic Thyroid Cancer                        | THAP     | Thyroid           | THCA     | Thyroid             | 3        | Y       |                         |
| 306  | MO_1397 | 51  | M      | Caucasian   | Poorly Differentiated Non-Small Cell Lung Cancer | NSCLCPD  | Lymph Node        | LUNG     | Lung                | 21       | Y       |                         |
| 307  | MO_1399 | 59  | F      | Caucasian   | Breast Invasive Ductal Carcinoma                 | IDC      | Bone              | BRCA     | Breast              | 45       | Y       |                         |
| 308  | MO_1400 | 52  | F      | Caucasian   | Esophageal Squamous Cell Carcinoma               | ESCC     | Liver             | HNSC     | Esophagus           | 10       | Y       |                         |
| 309  | MO_1402 | 53  | F      | Caucasian   | Intrahepatic Cholangiocarcinoma                  | IHCH     | Liver             | CHOL     | Liver               | 17       | Y       |                         |
| 310  | MO_1403 | 60  | F      | Caucasian   | Dedifferentiated Liposarcoma                     | DDLS     | Abdom. Mass       | SARC     | Abdomen             | 77       | Y       |                         |
| 311  | MO_1404 | 77  | F      | Caucasian   | Uterine Leiomyosarcoma                           | ULMS     | Abdom. Mass       | SARC     | Uterus              | 23       | Y       |                         |
| 312  | MO_1407 | 74  | F      | Caucasian   | Poorly Differentiated Carcinoma, NOS             | PDC      | Lymph Node        | MISC     | Unknown             | 29       | Y       |                         |
| 313  | MO_1408 | 70  | M      | Caucasian   | Adenoid Cystic Carcinoma                         | ACYC     | Lung              | SECR     | Parotid Gland       | 146      | Y       |                         |
| 314  | MO_1410 | 66  | M      | Caucasian   | Prostate Adenocarcinoma                          | PRAD     | Liver             | PRAD     | Prostate            | 32       | Y       |                         |
| 315  | MO_1411 | 38  | F      | African Am. | Breast Invasive Lobular Carcinoma                | ILC      | Chest Wall        | BRCA     | Breast              | 18       | Y       |                         |
| 316  | MO_1412 | 63  | F      | Caucasian   | Cutaneous Melanoma                               | SKCM     | Lymph Node        | SKCM     | Skin                | 120      | Y       |                         |
| 317  | MO_1415 | 46  | F      | African Am. | Breast Invasive Ductal Carcinoma                 | IDC      | Skin Punch        | BRCA     | Breast              | 19       | Y       |                         |
| 318  | MO_1416 | 39  | M      | Caucasian   | Esophageal Adenocarcinoma                        | ESCA     | Liver             | ESCA     | Esophagus           | 1        | N       |                         |
| 319  | MO_1418 | 55  | F      | African Am. | Breast Invasive Ductal Carcinoma                 | IDC      | Lymph Node        | BRCA     | Breast              | 9        | Y       |                         |
| 320  | MO_1419 | 66  | F      | Caucasian   | Sarcomatoid Carcinoma                            |          | Peritoneal Nodule | MISC     | Unknown             | 11       | Y       |                         |
| 321  | MO_1420 | 64  | M      | Caucasian   | Prostate Adenocarcinoma                          | PRAD     | Bone              | PRAD     | Prostate            | 40       | Y       |                         |

**SUPPLEMENTARY TABLE 1. DEMOGRAPHICS and CLINICAL DETAILS cont.**

| CASE | ID      | AGE | GENDER | POPULATION  | CANCER TYPE                        | ONCOTREE |                | ANALYSIS |                | INTERVAL | PRIOR   | OTHER CANCER HISTORY |
|------|---------|-----|--------|-------------|------------------------------------|----------|----------------|----------|----------------|----------|---------|----------------------|
|      |         |     |        |             |                                    | CODE     | BIOPSY SITE    | COHORT   | PRIMARY SITE   | (mo)     | THERAPY |                      |
| 322  | MO_1421 | 56  | M      | Caucasian   | Prostate Adenocarcinoma            | PRAD     | Bone           | PRAD     | Prostate       | 24       | Y       |                      |
| 323  | MO_1423 | 31  | M      | Caucasian   | Adamantinoma                       |          | Lung           | MISC     | Tibia          | 163      | Y       |                      |
| 324  | MO_1424 | 64  | F      | Caucasian   | Breast Invasive Ductal Carcinoma   | IDC      | Liver          | BRCA     | Breast         | 18       | Y       |                      |
| 325  | MO_1425 | 47  | F      | Caucasian   | Breast Invasive Lobular Carcinoma  | ILC      | Lymph Node     | BRCA     | Breast         | 56       | Y       |                      |
| 326  | MO_1426 | 66  | F      | Caucasian   | Breast Invasive Ductal Carcinoma   | IDC      | Brain          | BRCA     | Breast         | 27       | Y       |                      |
| 327  | MO_1427 | 55  | F      | Caucasian   | Breast Invasive Ductal Carcinoma   | IDC      | Chest Wall     | BRCA     | Breast         | 197      | Y       |                      |
| 328  | MO_1428 | 63  | F      | Caucasian   | Adenocarcinoma, NOS                | ADNOS    | Liver          | MISC     | Unknown        | 9        | Y       |                      |
| 329  | MO_1433 | 50  | M      | Caucasian   | Lung Adenocarcinoma                | LUAD     | Lymph Node     | LUNG     | Lung           | 7        | Y       |                      |
| 330  | MO_1434 | 56  | F      | Caucasian   | Adrenocortical Carcinoma           | ACC      | Liver          | ACC      | Adrenal        | 42       | Y       |                      |
| 331  | MO_1435 | 58  | F      | Caucasian   | Breast Invasive Lobular Carcinoma  | ILC      | Liver          | BRCA     | Breast         | 192      | Y       |                      |
| 332  | MO_1437 | 67  | M      | Caucasian   | Prostate Adenocarcinoma            | PRAD     | Liver          | PRAD     | Prostate       | 3        | Y       |                      |
| 333  | MO_1438 | 33  | F      | Caucasian   | Alveolar Soft Part Sarcoma         | ASPS     | Thigh          | SARC     | Thigh          | 5        | Y       |                      |
| 334  | MO_1439 | 32  | F      | Caucasian   | Metaplastic Breast Cancer          | MBC      | Liver          | BRCA     | Breast         | 55       | Y       |                      |
| 335  | MO_1442 | 53  | M      | Caucasian   | Adrenocortical Carcinoma           | ACC      | Abdom. Mass    | ACC      | Adrenal        | 10       | Y       |                      |
| 336  | MO_1443 | 63  | M      | Caucasian   | Prostate Adenocarcinoma            | PRAD     | Bone           | PRAD     | Prostate       | 10       | Y       |                      |
| 337  | MO_1444 | 60  | F      | Hispanic    | Breast Invasive Ductal Carcinoma   | IDC      | Psoas Muscle   | BRCA     | Breast         | 84       | Y       |                      |
| 338  | MO_1446 | 58  | M      | Caucasian   | Prostate Adenocarcinoma            | PRAD     | Bone           | PRAD     | Prostate       | 7        | Y       |                      |
| 339  | MO_1447 | 58  | M      | Caucasian   | Prostate Adenocarcinoma            | PRAD     | Lymph Node     | PRAD     | Prostate       | 10       | Y       |                      |
| 340  | MO_1448 | 65  | M      | Caucasian   | Intrahepatic Cholangiocarcinoma    | IHCH     | Liver          | CHOL     | Liver          | 31       | Y       |                      |
| 341  | MO_1449 | 22  | M      | Caucasian   | Ewing Sarcoma                      | ES       | Lung           | SARC     | Ankle          | 34       | Y       |                      |
| 342  | MO_1452 | 60  | F      | Caucasian   | Ovarian Adenocarcinoma             |          | Lymph Node     | OV       | Ovary          | 47       | Y       |                      |
| 343  | MO_1453 | 53  | M      | Caucasian   | Esophageal Squamous Cell Carcinoma | ESCC     | Lymph Node     | HNSC     | Esophagus      | 18       | Y       |                      |
| 344  | MO_1454 | 81  | F      | Caucasian   | Breast Invasive Lobular Carcinoma  | ILC      | Liver          | BRCA     | Breast         | 1        | N       |                      |
| 345  | MO_1455 | 65  | F      | Caucasian   | Breast Invasive Lobular Carcinoma  | ILC      | Bone           | BRCA     | Breast         | 165      | Y       |                      |
| 346  | MO_1458 | 71  | F      | Caucasian   | Serous Ovarian Cancer              | SOC      | Omentum        | MISC     | Ovary          | 2        | N       | Myxofibrosarcoma     |
| 347  | MO_1459 | 66  | M      | Caucasian   | Esophageal Adenocarcinoma          | ESCA     | Lymph Node     | ESCA     | Esophagus      | 26       | Y       |                      |
| 348  | MO_1460 | 64  | M      | Caucasian   | Prostate Neuroendocrine Carcinoma  | PRNE     | Liver          | PRAD     | Prostate       | 29       | Y       |                      |
| 349  | MO_1462 | 20  | F      | Caucasian   | Fibrolamellar Carcinoma            | FLC      | Liver          | HCC      | Liver          | 3        | Y       |                      |
| 350  | MO_1464 | 68  | F      | Caucasian   | Serous Ovarian Cancer              | SOC      | Thoracic Fluid | OV       | Fallopian Tube | 1        | N       |                      |
| 351  | MO_1465 | 42  | F      | Caucasian   | Glioblastoma Multiforme            | GBM      | Brain          | GBM      | Brain          | 5        | Y       |                      |
| 352  | MO_1466 | 74  | F      | Caucasian   | Pancreatic Neuroendocrine Tumor    | PANET    | Liver          | PAAD     | Pancreas       | 57       | Y       |                      |
| 353  | MO_1469 | 65  | M      | African Am. | Prostate Neuroendocrine Carcinoma  | PRNE     | Pelvic Mass    | PRAD     | Prostate       | 84       | Y       |                      |
| 354  | MO_1472 | 66  | M      | Caucasian   | Prostate Neuroendocrine Carcinoma  | PRNE     | Lymph Node     | PRAD     | Prostate       | 26       | Y       |                      |
| 355  | MO_1473 | 76  | M      | Caucasian   | Prostate Adenocarcinoma            | PRAD     | Bone           | PRAD     | Prostate       | 167      | Y       |                      |
| 356  | MO_1474 | 49  | F      | Caucasian   | Breast Invasive Ductal Carcinoma   | IDC      | Lung           | BRCA     | Breast         | 12       | Y       |                      |
| 357  | MO_1475 | 27  | F      | Caucasian   | Myxofibrosarcoma                   | MFS      | Lung           | SARC     | Abdomen        | 20       | Y       |                      |

**SUPPLEMENTARY TABLE 1. DEMOGRAPHICS and CLINICAL DETAILS cont.**

| CASE | ID      | AGE | GENDER | POPULATION  | CANCER TYPE                            | ONCOTREE |             | ANALYSIS |                | INTERVAL | PRIOR   |
|------|---------|-----|--------|-------------|----------------------------------------|----------|-------------|----------|----------------|----------|---------|
|      |         |     |        |             |                                        | CODE     | BIOPSY SITE | COHORT   | PRIMARY SITE   | (mo)     | THERAPY |
| 358  | MO_1476 | 71  | M      | Caucasian   | Esophageal Squamous Cell Carcinoma     | ESCC     | Liver       | HNSC     | Esophagus      | 1        | N       |
| 359  | MO_1477 | 56  | M      | Caucasian   | Esophageal Adenocarcinoma              | ESCA     | Liver       | ESCA     | Esophagus      | 1        | N       |
| 360  | MO_1478 | 62  | M      | Caucasian   | Pancreatic Neuroendocrine Tumor        | PANET    | Lymph Node  | PAAD     | Pancreas       | 10       | Y       |
| 361  | MO_1479 | 55  | M      | Caucasian   | Rhabdomyosarcoma                       | RMS      | Lung        | SARC     | Leg            | 18       | Y       |
| 362  | MO_1480 | 59  | M      | Caucasian   | Esophageal Adenocarcinoma              | ESCA     | Liver       | ESCA     | Esophagus      | 4        | Y       |
| 363  | MO_1481 | 49  | M      | Caucasian   | Soft Tissue Myoepithelial Carcinoma    | STMVEC   | Lung        | SECR     | Unknown        | 23       | Y       |
| 364  | MO_1482 | 59  | M      | Caucasian   | Prostate Neuroendocrine Carcinoma      | PRNE     | Liver       | PRAD     | Prostate       | 77       | Y       |
| 365  | MO_1483 | 49  | M      | Caucasian   | Undifferentiated Pleomorphic Sarcoma   | MFH      | Lung        | SARC     | Thigh          | 20       | Y       |
| 366  | MO_1484 | 49  | F      | Caucasian   | Myoepithelial Carcinoma                | MYEC     | Lung        | SECR     | Parotid Gland  | 33       | Y       |
| 367  | MO_1485 | 66  | M      | Caucasian   | Intrahepatic Cholangiocarcinoma        | IHCH     | Liver       | CHOL     | Unknown        | 3        | N       |
| 368  | MO_1486 | 66  | F      | Caucasian   | Pancreatic Adenocarcinoma              | PAAD     | Liver       | PAAD     | Pancreas       | 8        | Y       |
| 369  | MO_1487 | 31  | M      | Caucasian   | Sex Cord Stromal Tumor                 | TSCST    | Lymph Node  | MISC     | Testes         | 3        | N       |
| 370  | MO_1488 | 66  | M      | Caucasian   | Head and Neck Neuroendocrine Carcinoma | HNNE     | Abdom. Mass | MISC     | Larynx         | 15       | Y       |
| 371  | MO_1489 | 71  | M      | Caucasian   | Esophageal Squamous Cell Carcinoma     | ESCC     | Liver       | HNSC     | Esophagus      | 25       | Y       |
| 372  | MO_1490 | 74  | M      | Caucasian   | Prostate Adenocarcinoma                | PRAD     | Bone        | PRAD     | Prostate       | 130      | Y       |
| 373  | MO_1491 | 65  | F      | Caucasian   | Adenosarcoma                           |          | Liver       | MISC     | Pelvis         | 19       | Y       |
| 374  | MO_1492 | 59  | M      | Caucasian   | Prostate Adenocarcinoma                | PRAD     | Neck Mass   | PRAD     | Prostate       | 81       | Y       |
| 375  | MO_1493 | 66  | M      | Caucasian   | Esophageal Adenocarcinoma              | ESCA     | Pelvic Mass | ESCA     | Esophagus      | 30       | Y       |
| 376  | MO_1494 | 52  | F      | South Asian | Pancreatic Adenocarcinoma              | PAAD     | Liver       | PAAD     | Pancreas       | 11       | Y       |
| 377  | MO_1495 | 72  | F      | Caucasian   | Breast Invasive Ductal Carcinoma       | IDC      | Liver       | BRCA     | Breast         | 168      | Y       |
| 378  | MO_1496 | 58  | M      | Caucasian   | Prostate Neuroendocrine Carcinoma      | PRNE     | Lymph Node  | PRAD     | Prostate       | 1        | N       |
| 379  | MO_1499 | 73  | M      | Caucasian   | Prostate Adenocarcinoma                | PRAD     | Bone        | PRAD     | Prostate       | 52       | Y       |
| 380  | MO_1500 | 67  | M      | Caucasian   | Esophageal Adenocarcinoma              | ESCA     | Liver       | ESCA     | Esophagus      | 1        | N       |
| 381  | MO_1502 | 71  | M      | Caucasian   | Adenoid Cystic Carcinoma               | ACYC     | Lung        | SECR     | Salivary Gland | 28       | Y       |
| 382  | MO_1503 | 43  | F      | Caucasian   | Breast Invasive Ductal Carcinoma       | IDC      | Lymph Node  | BRCA     | Breast         | 13       | Y       |
| 383  | MO_1506 | 58  | M      | Caucasian   | Esophageal Adenocarcinoma              | ESCA     | Lymph Node  | ESCA     | Esophagus      | 22       | Y       |
| 384  | MO_1507 | 58  | F      | Caucasian   | Neuroendocrine Tumor, NOS              | NETNOS   | Liver       | MISC     | Unknown        | 6        | Y       |
| 385  | MO_1509 | 63  | F      | Caucasian   | Breast Invasive Lobular Carcinoma      | ILC      | Bone        | BRCA     | Breast         | 28       | Y       |
| 386  | MO_1510 | 64  | M      | Caucasian   | Prostate Adenocarcinoma                | PRAD     | Lymph Node  | PRAD     | Prostate       | 43       | Y       |
| 387  | MO_1511 | 69  | M      | Caucasian   | Prostate Adenocarcinoma                | PRAD     | Lymph Node  | PRAD     | Prostate       | 17       | Y       |
| 388  | MO_1513 | 61  | F      | Caucasian   | Breast Invasive Ductal Carcinoma       | IDC      | Liver       | BRCA     | Breast         | 240      | Y       |
| 389  | MO_1514 | 74  | M      | Caucasian   | Prostate Adenocarcinoma                | PRAD     | Lymph Node  | PRAD     | Prostate       | 64       | Y       |
| 390  | MO_1515 | 55  | F      | Caucasian   | Breast Invasive Ductal Carcinoma       | IDC      | Liver       | BRCA     | Breast         | 105      | Y       |
| 391  | MO_1516 | 58  | F      | Caucasian   | Breast Invasive Ductal Carcinoma       | IDC      | Liver       | BRCA     | Breast         | 153      | Y       |
| 392  | MO_1517 | 75  | M      | Caucasian   | Prostate Adenocarcinoma                | PRAD     | Adrenal     | PRAD     | Prostate       | 67       | Y       |
| 393  | MO_1518 | 63  | F      | Caucasian   | Poorly Differentiated Carcinoma, NOS   | PDC      | Liver       | MISC     | Unknown        | 2        | N       |

**SUPPLEMENTARY TABLE 1. DEMOGRAPHICS and CLINICAL DETAILS cont.**

| CASE | ID      | AGE | GENDER | POPULATION  | CANCER TYPE                          | ONCOTREE |                  | ANALYSIS |                | INTERVAL | PRIOR   | OTHER CANCER HISTORY    |
|------|---------|-----|--------|-------------|--------------------------------------|----------|------------------|----------|----------------|----------|---------|-------------------------|
|      |         |     |        |             |                                      | CODE     | BIOPSY SITE      | COHORT   | PRIMARY SITE   | (mo)     | THERAPY |                         |
| 394  | MO_1520 | 53  | M      | Hispanic    | Esophageal Adenocarcinoma            | ESCA     | Shoulder         | ESCA     | Esophagus      | 12       | Y       |                         |
| 395  | MO_1521 | 66  | F      | Caucasian   | Breast Invasive Ductal Carcinoma     | IDC      | Liver            | BRCA     | Breast         | 224      | Y       |                         |
| 396  | MO_1522 | 66  | F      | Caucasian   | Collecting Duct Renal Cell Carcinoma | CDRDD    | Lymph Node       | KDNY     | Kidney         | 8        | Y       |                         |
| 397  | MO_1524 | 59  | F      | Caucasian   | Breast Invasive Lobular Carcinoma    | ILC      | Lymph Node       | BRCA     | Breast         | 29       | Y       |                         |
| 398  | MO_1525 | 63  | M      | Caucasian   | Osteosarcoma                         | OS       | Pleural Mass     | SARC     | Thigh          | 120      | Y       | Solitary Fibrous Tumor  |
| 399  | MO_1527 | 58  | F      | Caucasian   | Breast Invasive Ductal Carcinoma     | IDC      | Hip Lesion       | BRCA     | Breast         | 62       | Y       |                         |
| 400  | MO_1528 | 63  | F      | Caucasian   | Breast Invasive Ductal Carcinoma     | IDC      | Liver            | BRCA     | Breast         | 7        | Y       |                         |
| 401  | MO_1529 | 48  | F      | Caucasian   | Pancreatic Neuroendocrine Tumor      | PANET    | Liver            | PAAD     | Pancreas       | 2        | Y       |                         |
| 402  | MO_1530 | 71  | M      | Caucasian   | Renal Clear Cell Carcinoma           | CCRCC    | Liver            | KDNY     | Kidney         | 91       | Y       |                         |
| 403  | MO_1532 | 48  | M      | Caucasian   | Salivary Carcinoma                   | SACA     | Lymph Node       | SECR     | Salivary Gland | 84       | Y       |                         |
| 404  | MO_1533 | 59  | F      | Caucasian   | Breast Invasive Ductal Carcinoma     | IDC      | Subq Nodule      | BRCA     | Breast         | 57       | Y       |                         |
| 405  | MO_1534 | 31  | F      | Caucasian   | Breast Invasive Ductal Carcinoma     | IDC      | Liver            | BRCA     | Breast         | 55       | Y       |                         |
| 406  | MO_1536 | 55  | F      | Caucasian   | Breast Invasive Ductal Carcinoma     | IDC      | Liver            | BRCA     | Breast         | 11       | Y       |                         |
| 407  | MO_1537 | 45  | F      | Caucasian   | Breast Invasive Ductal Carcinoma     | IDC      | Lymph Node       | BRCA     | Breast         | 27       | Y       |                         |
| 408  | MO_1540 | 50  | F      | Caucasian   | Breast Invasive Ductal Carcinoma     | IDC      | Bone             | BRCA     | Breast         | 27       | Y       |                         |
| 409  | MO_1541 | 71  | M      | South Asian | Prostate Adenocarcinoma              | PRAD     | Liver            | PRAD     | Prostate       | 14       | Y       |                         |
| 410  | MO_1542 | 67  | M      | Caucasian   | Poorly Differentiated Carcinoma, NOS | PDC      | Lymph Node       | MISC     | Unknown        | 2        | N       |                         |
| 411  | MO_1543 | 61  | M      | Caucasian   | Prostate Adenocarcinoma              | PRAD     | Liver            | PRAD     | Prostate       | 132      | Y       |                         |
| 412  | MO_1547 | 66  | F      | Caucasian   | Salivary Carcinoma, Other            | OSACA    | Lymph Node       | SECR     | Parotid        | 30       | Y       |                         |
| 413  | MO_1550 | 61  | F      | African Am. | Intrahepatic Cholangiocarcinoma      | IHCH     | Liver            | CHOL     | Liver          | 27       | Y       |                         |
| 414  | MO_1551 | 72  | F      | Caucasian   | Breast Invasive Ductal Carcinoma     | IDC      | Liver            | BRCA     | Breast         | 20       | Y       |                         |
| 415  | MO_1552 | 41  | F      | Caucasian   | Intrahepatic Cholangiocarcinoma      | IHCH     | Liver            | CHOL     | Liver          | 15       | Y       |                         |
| 416  | MO_1553 | 56  | M      | Caucasian   | Prostate Adenocarcinoma              | PRAD     | Lymph Node       | PRAD     | Prostate       | 93       | Y       |                         |
| 417  | MO_1555 | 70  | F      | Caucasian   | Angiosarcoma                         | ANGS     | Subq Nodule      | SARC     | Back           | 39       | Y       |                         |
| 418  | MO_1556 | 59  | M      | Caucasian   | Prostate Adenocarcinoma              | PRAD     | Lymph Node       | PRAD     | Prostate       | 107      | Y       |                         |
| 419  | MO_1557 | 66  | F      | Caucasian   | Breast Invasive Ductal Carcinoma     | IDC      | Lymph Node       | BRCA     | Breast         | 149      | Y       |                         |
| 420  | MO_1558 | 77  | F      | Caucasian   | Lung Adenocarcinoma                  | LUAD     | Lymph Node       | LUNG     | Lung           | 25       | Y       |                         |
| 421  | MO_1562 | 60  | F      | Caucasian   | Breast Invasive Ductal Carcinoma     | IDC      | Axillary Mass    | BRCA     | Breast         | 21       | Y       |                         |
| 422  | MO_1563 | 68  | M      | Caucasian   | Squamous Cell Carcinoma, NOS         | SCCNOS   | Omental Mass     | MISC     | Unknown        | 2        | N       |                         |
| 423  | ES_5001 | 65  | F      | South Asian | Breast Invasive Ductal Carcinoma     | IDC      | Brain            | BRCA     | Breast         | 26       | Y       |                         |
| 424  | ES_5004 | 33  | F      | Caucasian   | Colon Adenocarcinoma                 | COAD     | Abdom. Wall      | COLO     | Colon          | 34       | Y       |                         |
| 425  | ES_5005 | 27  | F      | Caucasian   | Cervical Neuroendocrine Tumor        | CENE     | Cervix           | MISC     | Cervix         | 1        | N       |                         |
| 426  | TP_2001 | 70  | M      | Caucasian   | Prostate Adenocarcinoma              | PRAD     | Lymph Node       | PRAD     | Prostate       | 39       | Y       |                         |
| 427  | TP_2002 | 59  | F      | Caucasian   | Adenocarcinoma, NOS                  | ADNOS    | Peritoneal Fluid | MISC     | Unknown        | 98       | Y       | Breast Ductal Carcinoma |
| 428  | TP_2004 | 52  | M      | Caucasian   | Breast Invasive Carcinoma, NOS       | BRCNOS   | Bone             | BRCA     | Breast         | 17       | Y       |                         |
| 429  | TP_2008 | 26  | F      | Caucasian   | Intrahepatic Cholangiocarcinoma      | IHCH     | Liver            | CHOL     | Liver          | 16       | Y       |                         |

**SUPPLEMENTARY TABLE 1. DEMOGRAPHICS and CLINICAL DETAILS cont.**

| CASE | ID      | AGE | GENDER | POPULATION  | CANCER TYPE                                      | ONCOTREE |                   | ANALYSIS |                 | INTERVAL | PRIOR   | OTHER CANCER HISTORY    |
|------|---------|-----|--------|-------------|--------------------------------------------------|----------|-------------------|----------|-----------------|----------|---------|-------------------------|
|      |         |     |        |             |                                                  | CODE     | BIOPSY SITE       | COHORT   | PRIMARY SITE    | (mo)     | THERAPY |                         |
| 430  | TP_2009 | 58  | M      | Caucasian   | Prostate Adenocarcinoma                          | PRAD     | Bone              | PRAD     | Prostate        | 21       | Y       |                         |
| 431  | TP_2010 | 64  | M      | Caucasian   | Prostate Adenocarcinoma                          | PRAD     | Lymph Node        | PRAD     | Prostate        | 66       | Y       |                         |
| 432  | TP_2011 | 56  | F      | Caucasian   | Renal Cell Carcinoma                             | RCC      | Liver             | KDNY     | Kidney          | 180      | Y       |                         |
| 433  | TP_2013 | 58  | M      | East Asian  | Angiosarcoma                                     | ANGS     | Liver             | SARC     | Scalp           | 27       | Y       |                         |
| 434  | TP_2014 | 70  | F      | African Am. | Uterine Endometrioid Carcinoma                   | UEC      | Omentum           | MISC     | Unknown         | 36       | Y       |                         |
| 435  | TP_2015 | 53  | F      | Caucasian   | Breast Invasive Ductal Carcinoma                 | IDC      | Lymph Node        | BRCA     | Breast          | 143      | Y       |                         |
| 436  | TP_2016 | 32  | F      | Caucasian   | Extrahepatic Cholangiocarcinoma                  | EHCH     | Lymph Node        | CHOL     | Bile Duct       | 23       | Y       |                         |
| 437  | TP_2017 | 51  | M      | Caucasian   | Colon Adenocarcinoma                             | COAD     | Abdom. Mass       | COLO     | Colorectal      | 84       | Y       |                         |
| 438  | TP_2018 | 72  | M      | Caucasian   | Penile Squamous Cell Carcinoma                   | PSCC     | Thigh Mass        | HNSC     | Penis           | 13       | Y       |                         |
| 439  | TP_2019 | 49  | M      | Caucasian   | Cutaneous Melanoma                               | SKCM     | Subq Nodule       | SKCM     | Skin            | 3        | Y       |                         |
| 440  | TP_2020 | 55  | M      | Caucasian   | Prostate Adenocarcinoma                          | PRAD     | Bone              | PRAD     | Prostate        | 39       | Y       |                         |
| 441  | TP_2021 | 56  | M      | Caucasian   | Urethral Urothelial Carcinoma                    | UCU      | Lymph Node        | BLCA     | Ureter          | 61       | Y       |                         |
| 442  | TP_2023 | 23  | F      | Caucasian   | Undifferentiated High-Grade Sarcoma              | SARC NOS | Thigh Mass        | SARC     | Thigh           | 3        | Y       |                         |
| 443  | TP_2024 | 56  | F      | Caucasian   | Small Cell Lung Cancer                           | SCLC     | Liver             | LUNG     | Lung            | 59       | Y       | Breast Ductal Carcinoma |
| 444  | TP_2025 | 64  | F      | African Am. | Breast Invasive Ductal Carcinoma                 | IDC      | Liver             | BRCA     | Breast          | 112      | Y       |                         |
| 445  | TP_2027 | 68  | M      | Caucasian   | Cutaneous Melanoma                               | SKCM     | Subq Nodule       | SKCM     | Skin            | 54       | Y       |                         |
| 446  | TP_2028 | 72  | F      | Caucasian   | Sebaceous Carcinoma                              | SEBA     | Subq Nodule       | SECR     | Orbit Of Eye    | 48       | Y       |                         |
| 447  | TP_2029 | 45  | M      | Caucasian   | Colon Adenocarcinoma                             | COAD     | Abdom. Mass       | COLO     | Colorectal      | 17       | Y       |                         |
| 448  | TP_2032 | 74  | M      | Caucasian   | Prostate Adenocarcinoma                          | PRAD     | Peritoneal Nodule | PRAD     | Prostate        | 123      | Y       | Papillary Thyroid       |
| 449  | TP_2034 | 50  | M      | East Asian  | Prostate Adenocarcinoma                          | PRAD     | Bone              | PRAD     | Prostate        | 14       | Y       |                         |
| 450  | TP_2037 | 49  | M      | Caucasian   | Prostate Adenocarcinoma                          | PRAD     | Lymph Node        | PRAD     | Prostate        | 176      | Y       |                         |
| 451  | TP_2038 | 64  | F      | South Asian | Intrahepatic Cholangiocarcinoma                  | IHCH     | Liver             | CHOL     | Liver           | 18       | Y       |                         |
| 452  | TP_2042 | 70  | M      | Caucasian   | Lung Adenocarcinoma                              | LUAD     | Lung              | MISC     | Lung            | 10       | Y       |                         |
| 453  | TP_2043 | 62  | M      | Caucasian   | Solitary Fibrous Tumor                           | SFT      | Lung              | SARC     | Lung            | 106      | Y       | Prostate Carcinoma      |
| 454  | TP_2047 | 52  | M      | Caucasian   | Pancreatic Adenocarcinoma                        | PAAD     | Lung              | PAAD     | Pancreas        | 24       | Y       |                         |
| 455  | TP_2050 | 61  | M      | Caucasian   | Seminal Vesicle Carcinoma                        |          | Abdom. Mass       | MISC     | Seminal Vesicle | 5        | Y       |                         |
| 456  | TP_2052 | 52  | F      | Caucasian   | Poorly Differentiated Non-Small Cell Lung Cancer | NSCLCPD  | Adrenal           | LUNG     | Lung            | 16       | Y       |                         |
| 457  | TP_2054 | 70  | M      | South Asian | Prostate Adenocarcinoma                          | PRAD     | Lymph Node        | PRAD     | Prostate        | 33       | Y       |                         |
| 458  | TP_2055 | 41  | F      | East Asian  | Atypical Meningioma                              | ATM      | Brain             | MISC     | Skull Base      | 58       | Y       |                         |
| 459  | TP_2056 | 46  | F      | Caucasian   | Glioblastoma Multiforme                          | GBM      | Brain             | GBM      | Brain           | 7        | Y       |                         |
| 460  | TP_2058 | 62  | M      | Caucasian   | Bladder Urothelial Carcinoma                     | BLCA     | Bladder           | BLCA     | Bladder         | 0        | N       |                         |
| 461  | TP_2059 | 71  | M      | Caucasian   | Extramammary Paget Disease                       | EMPD     | Lymph Node        | MISC     | Scrotum         | 18       | Y       |                         |
| 462  | TP_2060 | 72  | M      | Caucasian   | Prostate Adenocarcinoma                          | PRAD     | Lymph Node        | PRAD     | Prostate        | 17       | Y       |                         |
| 463  | TP_2061 | 65  | M      | Caucasian   | Prostate Carcinosarcoma                          |          | Pelvic Mass       | PRAD     | Prostate        | 61       | Y       |                         |
| 464  | TP_2064 | 72  | M      | Caucasian   | Prostate Adenocarcinoma                          | PRAD     | Lymph Node        | PRAD     | Prostate        | 114      | Y       |                         |
| 465  | TP_2065 | 52  | F      | Caucasian   | Glioblastoma Multiforme                          | GBM      | Brain             | GBM      | Brain           | 3        | Y       |                         |

**SUPPLEMENTARY TABLE 1. DEMOGRAPHICS and CLINICAL DETAILS cont.**

| CASE | ID      | AGE | GENDER | POPULATION  | CANCER TYPE                          | ONCOTREE |                | ANALYSIS |               | INTERVAL | PRIOR   | OTHER CANCER HISTORY |
|------|---------|-----|--------|-------------|--------------------------------------|----------|----------------|----------|---------------|----------|---------|----------------------|
|      |         |     |        |             |                                      | CODE     | BIOPSY SITE    | COHORT   | PRIMARY SITE  | (mo)     | THERAPY |                      |
| 466  | TP_2067 | 66  | F      | Caucasian   | Uterine Leiomyosarcoma               | ULMS     | Pelvic Mass    | SARC     | Uterus        | 7        | Y       |                      |
| 467  | TP_2069 | 66  | M      | Caucasian   | Prostate Adenocarcinoma              | PRAD     | Lymph Node     | PRAD     | Prostate      | 29       | Y       |                      |
| 468  | TP_2070 | 64  | F      | Caucasian   | Uterine Leiomyosarcoma               | ULMS     | Pelvic Mass    | SARC     | Uterus        | 48       | Y       |                      |
| 469  | TP_2071 | 52  | F      | East Asian  | Clear Cell Ovarian Cancer            | CCOV     | Pelvic Mass    | OV       | Ovary         | 12       | Y       |                      |
| 470  | TP_2072 | 38  | M      | African Am. | Solitary Fibrous Tumor               | SFT      | Spinal Mass    | SARC     | Spinal Canal  | 5        | Y       |                      |
| 471  | TP_2073 | 52  | F      | Caucasian   | Pleural Mesothelioma                 | PLMESO   | Lymph Node     | LUNG     | Pleura        | 17       | Y       |                      |
| 472  | TP_2074 | 66  | F      | Caucasian   | Clear Cell Ovarian Cancer            | CCOV     | Lymph Node     | OV       | Ovary         | 21       | Y       |                      |
| 473  | TP_2075 | 43  | F      | Caucasian   | Solitary Fibrous Tumor               | SFT      | Lacrimal Gland | SARC     | Eyelid        | 11       | Y       |                      |
| 474  | TP_2077 | 68  | M      | Caucasian   | Prostate Adenocarcinoma              | PRAD     | Lymph Node     | PRAD     | Prostate      | 84       | Y       |                      |
| 475  | TP_2078 | 86  | M      | Caucasian   | Prostate Adenocarcinoma              | PRAD     | Lymph Node     | PRAD     | Prostate      | 172      | Y       |                      |
| 476  | TP_2079 | 67  | M      | Caucasian   | Prostate Adenocarcinoma              | PRAD     | Bone           | PRAD     | Prostate      | 69       | Y       |                      |
| 477  | TP_2080 | 57  | M      | Caucasian   | Prostate Adenocarcinoma              | PRAD     | Prostate       | PRAD     | Prostate      | 2        | Y       |                      |
| 478  | TP_2081 | 63  | M      | Caucasian   | Prostate Adenocarcinoma              | PRAD     | Bone           | PRAD     | Prostate      | 37       | Y       |                      |
| 479  | TP_2083 | 67  | F      | Caucasian   | Breast Invasive Ductal Carcinoma     | IDC      | Liver          | BRCA     | Breast        | 171      | Y       |                      |
| 480  | TP_2086 | 74  | M      | Caucasian   | Pancreatic Adenocarcinoma            | PAAD     | Liver          | PAAD     | Pancreas      | 53       | Y       |                      |
| 481  | TP_2087 | 59  | F      | Caucasian   | Serous Ovarian Cancer                | SOC      | Colon          | OV       | Ovary         | 29       | Y       |                      |
| 482  | TP_2090 | 37  | M      | Caucasian   | Prostate Adenocarcinoma              | PRAD     | Bone           | PRAD     | Prostate      | 12       | Y       |                      |
| 483  | TP_2091 | 58  | M      | Caucasian   | Glioblastoma Multiforme              | GBM      | Brain          | GBM      | Brain         | 5        | Y       |                      |
| 484  | TP_2093 | 64  | M      | Caucasian   | Prostate Adenocarcinoma              | PRAD     | Lymph Node     | PRAD     | Prostate      | 12       | Y       |                      |
| 485  | TP_2096 | 54  | M      | Caucasian   | Prostate Adenocarcinoma              | PRAD     | Lymph Node     | PRAD     | Prostate      | 60       | Y       |                      |
| 486  | TP_2098 | 78  | M      | Caucasian   | Myoepithelial Carcinoma              | MYEC     | Gluteal Mass   | SECR     | Parotid Gland | 88       | Y       |                      |
| 487  | TP_2100 | 66  | F      | Caucasian   | Esophageal Squamous Cell Carcinoma   | ESCC     | Liver          | HNSC     | Esophagus     | 1        | N       |                      |
| 488  | TP_2101 | 46  | M      | Caucasian   | Oral Cavity Squamous Cell Carcinoma  | OCSC     | Lung           | HNSC     | Tongue        | 29       | Y       |                      |
| 489  | TP_2102 | 44  | M      | Caucasian   | Undifferentiated Pleomorphic Sarcoma | MFH      | Arm            | SARC     | Thigh         | 61       | Y       |                      |
| 490  | TP_2106 | 59  | F      | Caucasian   | Pancreatic Adenocarcinoma            | PAAD     | Bone           | PAAD     | Pancreas      | 53       | Y       |                      |
| 491  | TP_2109 | 48  | F      | Caucasian   | Breast Invasive Lobular Carcinoma    | ILC      | Lymph Node     | BRCA     | Breast        | 1        | N       |                      |
| 492  | TP_2118 | 45  | F      | African Am. | Breast Invasive Ductal Carcinoma     | IDC      | Lymph Node     | BRCA     | Breast        | 16       | Y       |                      |
| 493  | TP_2119 | 59  | M      | Caucasian   | Dedifferentiated Chondrosarcoma      | DDCHS    | Liver          | SARC     | Thigh         | 108      | Y       |                      |
| 494  | TP_2120 | 64  | F      | Caucasian   | Glioblastoma Multiforme              | GBM      | Brain          | GBM      | Brain         | 1        | N       |                      |
| 495  | TP_2122 | 67  | F      | Caucasian   | Metaplastic Breast Cancer            | MBC      | Lymph Node     | BRCA     | Breast        | 9        | Y       |                      |
| 496  | TP_2123 | 25  | M      | Caucasian   | Ependymoma                           | EPM      | Brain          | MISC     | Brain         | 197      | Y       |                      |
| 497  | TP_2130 | 70  | M      | Caucasian   | Sinonasal Squamous Cell Carcinoma    | SNSC     | Sphenoid Sinus | HNSC     | Sinus         | 11       | Y       |                      |
| 498  | TP_2131 | 77  | M      | Caucasian   | Bladder Urothelial Carcinoma         | BLCA     | Liver          | BLCA     | Bladder       | 7        | Y       |                      |
| 499  | TP_2141 | 43  | F      | Caucasian   | Breast Invasive Ductal Carcinoma     | IDC      | Liver          | BRCA     | Breast        | 36       | Y       |                      |
| 500  | TP_2156 | 75  | M      | Caucasian   | Prostate Adenocarcinoma              | PRAD     | Liver          | PRAD     | Prostate      | 156      | Y       |                      |

**Supplementary Table 2. Sample Sequencing Statistics**

| Case    | Tumor Content<br>(Pathology) | Tumor Content<br>(Sequencing) | Capture<br>Platform | Mean Coverage<br>(Tumor Exome) | Mean Coverage<br>(Normal Exome) | Number of<br>Mutations | Effective Target<br>Size (Mb) | Mutation Rate<br>(Mutations/Mb) | Transcriptome<br># of Reads | Splice Junctions<br>Covered |
|---------|------------------------------|-------------------------------|---------------------|--------------------------------|---------------------------------|------------------------|-------------------------------|---------------------------------|-----------------------------|-----------------------------|
| MO_1001 | 90%                          | 54%                           | Roche-v2            | 131                            | 129                             | 299                    | 61.47                         | 4.86                            | 94531888                    | 291363                      |
| MO_1002 | 90%                          | 38%                           | Roche-v2            | 130                            | 123                             | 92                     | 61.08                         | 1.51                            | 118581455                   | 361278                      |
| MO_1005 | 80%                          | <30%                          | Roche-v2            | 121                            | 105                             | 72                     | 61.92                         | 1.16                            | 86654440                    | 360457                      |
| MO_1007 | 30%                          | 30%                           | Roche-v2            | 151                            | 115                             | 135                    | 65.24                         | 2.07                            | 95766816                    | 195997                      |
| MO_1008 | NA                           | <30%                          | Roche-v2            | 121                            | 117                             | 37                     | 60.59                         | 0.61                            | 99286728                    | 350949                      |
| MO_1011 | 50%                          | 81%                           | Roche-v2            | 112                            | 75                              | 84                     | 62.75                         | 1.34                            | 59625334                    | 314898                      |
| MO_1012 | 50%                          | 54%                           | Roche-v2            | 116                            | 79                              | 1800                   | 61.95                         | 29.06                           | 55461509                    | 66952                       |
| MO_1013 | 80%                          | 43%                           | Roche-v2            | 166                            | 110                             | 411                    | 65.48                         | 6.28                            | 59486854                    | 250438                      |
| MO_1014 | 80%                          | 39%                           | Roche-v2            | 139                            | 157                             | 268                    | 64.44                         | 4.16                            | 55264227                    | 184216                      |
| MO_1015 | 80%                          | 54%                           | Roche-v2            | 177                            | 106                             | 136                    | 65.14                         | 2.09                            | 54634232                    | 258158                      |
| MO_1016 | 50%                          | 58%                           | Roche-v2            | 190                            | 103                             | 512                    | 66.13                         | 7.74                            | 58697128                    | 316136                      |
| MO_1017 | 80%                          | <30%                          | Roche-v2            | 184                            | 106                             | 71                     | 65.92                         | 1.08                            | 72256976                    | 333222                      |
| MO_1020 | 35%                          | 36%                           | Roche-v2            | 132                            | 98                              | 135                    | 62.5                          | 2.16                            | 63228565                    | 257456                      |
| MO_1022 | 35%                          | 38%                           | Roche-v2            | 91                             | 51                              | 44                     | 55.64                         | 0.79                            | 90939341                    | 370756                      |
| MO_1023 | 60%                          | 30%                           | Roche-v2            | 94                             | 48                              | 40                     | 57.44                         | 0.7                             | 89992313                    | 176179                      |
| MO_1024 | 70%                          | 87%                           | Roche-v2            | 106                            | 68                              | 279                    | 58.57                         | 4.76                            | 96672782                    | 361640                      |
| MO_1025 | 90%                          | 94%                           | Roche-v2            | 167                            | 122                             | 84                     | 65.58                         | 1.28                            | 104349123                   | 373016                      |
| MO_1026 | 88%                          | 43%                           | Roche-v2            | 140                            | 98                              | 152                    | 64.96                         | 2.34                            | 91201493                    | 369676                      |
| MO_1027 | 50%                          | 62%                           | Roche-v2            | 183                            | 113                             | 459                    | 66.42                         | 6.91                            | 107092664                   | 374530                      |
| MO_1028 | 90%                          | 90%                           | Agilent-50          | 182                            | 85                              | 480                    | 78.57                         | 6.11                            | 71729868                    | 329375                      |
| MO_1030 | NA                           | 84%                           | Agilent-v4          | 27                             | 114                             | 44                     | 31.36                         | 1.4                             | 118303657                   | 295487                      |
| MO_1031 | 78%                          | 66%                           | Agilent-v4          | 150                            | 110                             | 738                    | 75.21                         | 9.81                            | 95094288                    | 366535                      |
| MO_1032 | 70%                          | 54%                           | Agilent-50          | 145                            | 105                             | 512                    | 74.92                         | 6.83                            | 101844372                   | 368788                      |
| MO_1033 | 70%                          | 87%                           | Agilent-50          | 144                            | 112                             | 121                    | 73.18                         | 1.65                            | 97261191                    | 397484                      |
| MO_1034 | 90%                          | 30%                           | Agilent-v4          | 20                             | 93                              | 20                     | 16.44                         | 1.22                            | 96537233                    | 431138                      |
| MO_1035 | 80%                          | 84%                           | Agilent-v4          | 67                             | 99                              | 77                     | 68.56                         | 1.12                            | 88843652                    | 365169                      |
| MO_1036 | 30%                          | 53%                           | Agilent-v4          | 212                            | 101                             | 103                    | 77.79                         | 1.32                            | 99528975                    | 340142                      |
| MO_1037 | 88%                          | 87%                           | Agilent-v4          | 151                            | 99                              | 111                    | 72.43                         | 1.53                            | 95037099                    | 362410                      |
| MO_1038 | 70%                          | 88%                           | Agilent-v4          | 125                            | 107                             | 1626                   | 69.5                          | 23.39                           | 69497081                    | 235497                      |
| MO_1039 | 80%                          | 58%                           | Agilent-v4          | 130                            | 82                              | 87                     | 74.72                         | 1.16                            | 98201462                    | 360542                      |
| MO_1040 | 90%                          | 69%                           | Agilent-v4          | 147                            | 99                              | 126                    | 71.37                         | 1.77                            | 87418303                    | 313817                      |
| MO_1042 | 60-65%                       | 30%                           | Agilent-v4          | 148                            | 87                              | 216                    | 75.99                         | 2.84                            | 85845575                    | 353716                      |
| MO_1043 | 40%                          | 30%                           | Agilent-v4          | 134                            | 146                             | 46                     | 63.29                         | 0.73                            | 117883170                   | 361024                      |
| MO_1044 | 85%                          | 61%                           | Agilent-v4          | 151                            | 143                             | 52                     | 74.67                         | 0.7                             | 125947729                   | 391600                      |
| MO_1045 | 30%                          | 40%                           | Agilent-v4          | 165                            | 117                             | 112                    | 75.37                         | 1.49                            | 96812161                    | 272078                      |
| MO_1046 | 40%                          | 40%                           | Agilent-v4          | 124                            | 136                             | 513                    | 69.64                         | 7.37                            | 92647625                    | 328359                      |
| MO_1047 | 30%                          | 61%                           | Agilent-v4          | 131                            | 146                             | 132                    | 73.34                         | 1.8                             | 95319762                    | 335507                      |
| MO_1048 | 70%                          | 31%                           | Agilent-v4          | 129                            | 146                             | 1391                   | 73.55                         | 18.91                           | 86288073                    | 354521                      |
| MO_1049 | 85%                          | 73%                           | Agilent-v4          | 115                            | 123                             | 254                    | 68.57                         | 3.7                             | 99537629                    | 329002                      |
| MO_1050 | 55%                          | 33%                           | Agilent-v4          | 119                            | 122                             | 222                    | 71.53                         | 3.1                             | 90340925                    | 357700                      |
| MO_1051 | 60%                          | 59%                           | Agilent-v4          | 100                            | 131                             | 726                    | 74.66                         | 9.72                            | 64494180                    | 317307                      |

Supplementary Table 2 cont. Sample Sequencing Statistics

| Case    | Tumor Content (Pathology) | Tumor Content (Sequencing) | Capture Platform | Mean Coverage (Tumor Exome) | Mean Coverage (Normal Exome) | Number of Mutations | Effective Target Size (Mb) | Mutation Rate (Mutations/Mb) | Transcriptome # of Reads | Splice Junctions Covered |
|---------|---------------------------|----------------------------|------------------|-----------------------------|------------------------------|---------------------|----------------------------|------------------------------|--------------------------|--------------------------|
| MO_1052 | 55%                       | 58%                        | Agilent-v4       | 112                         | 91                           | 162                 | 66.53                      | 2.43                         | 80701118                 | 19953                    |
| MO_1053 | 85%                       | 80%                        | Agilent-v4       | 100                         | 130                          | 304                 | 66.14                      | 4.6                          | 92914636                 | 359709                   |
| MO_1055 | 75%                       | 48%                        | Agilent-v4       | 153                         | 112                          | 6308                | 76.58                      | 82.37                        | 119502376                | 354233                   |
| MO_1058 | 30%                       | 30%                        | Agilent-v4       | 149                         | 109                          | 163                 | 71.19                      | 2.29                         | 100773918                | 340338                   |
| MO_1059 | 65%                       | 85%                        | Agilent-v4       | 148                         | 121                          | 160                 | 71.64                      | 2.23                         | 95791838                 | 351633                   |
| MO_1060 | 55%                       | 69%                        | Agilent-v4       | 156                         | 113                          | 131                 | 75.57                      | 1.73                         | 94242216                 | 348443                   |
| MO_1061 | 65-80%                    | 30%                        | Agilent-v4       | 152                         | 118                          | 76                  | 77.2                       | 0.98                         | 95314795                 | 369781                   |
| MO_1062 | 40%                       | 30%                        | Agilent-v4       | 177                         | 101                          | 99                  | 74.49                      | 1.33                         | 100911022                | 313613                   |
| MO_1063 | 80%                       | 73%                        | Agilent-v4       | 125                         | 100                          | 247                 | 74.27                      | 3.33                         | 94455968                 | 349835                   |
| MO_1064 | 85%                       | 78%                        | Agilent-v4       | 149                         | 103                          | 52                  | 69.58                      | 0.75                         | 99265802                 | 352226                   |
| MO_1065 | 75%                       | 62%                        | Agilent-v4       | 158                         | 100                          | 411                 | 74.02                      | 5.55                         | 102344255                | 365257                   |
| MO_1066 | 55-85%                    | 85%                        | Agilent-v4       | 184                         | 127                          | 185                 | 83.96                      | 2.2                          | 70502363                 | 315588                   |
| MO_1067 | 100%                      | 53%                        | Agilent-v4       | 141                         | 88                           | 247                 | 72.99                      | 3.38                         | 100337185                | 351747                   |
| MO_1068 | 100%                      | 30%                        | Agilent-v4       | 161                         | 94                           | 1622                | 71.01                      | 22.84                        | 97070828                 | 364407                   |
| MO_1069 | 75%                       | 83%                        | Agilent-v4       | 157                         | 108                          | 210                 | 64.12                      | 3.28                         | 98420734                 | 360053                   |
| MO_1070 | 50%                       | 41%                        | Agilent-v4       | 165                         | 107                          | 1301                | 72.21                      | 18.02                        | 101310008                | 357566                   |
| MO_1072 | 20%                       | 52%                        | Agilent-v4       | 196                         | 108                          | 898                 | 79.29                      | 11.33                        | 41325957                 | 279652                   |
| MO_1073 | 85%                       | 74%                        | Agilent-v4       | 142                         | 122                          | 287                 | 75.58                      | 3.8                          | 77328772                 | 312563                   |
| MO_1074 | 60%                       | 43%                        | Agilent-v4       | 144                         | 120                          | 165                 | 78.2                       | 2.11                         | 110819626                | 393415                   |
| MO_1075 | 20%                       | <30%                       | Agilent-v4       | 158                         | 107                          | 33                  | 72.74                      | 0.45                         | 73665360                 | 266462                   |
| MO_1076 | 80%                       | 45%                        | Agilent-v4       | 148                         | 109                          | 78                  | 70.15                      | 1.11                         | 63407637                 | 289794                   |
| MO_1077 | 50%                       | 87%                        | Agilent-v4       | 163                         | 118                          | 168                 | 71.54                      | 2.35                         | 66234849                 | 339559                   |
| MO_1079 | 80%                       | 31%                        | Agilent-v4       | 151                         | 110                          | 359                 | 73.8                       | 4.86                         | 86866282                 | 329368                   |
| MO_1080 | 85%                       | 64%                        | Agilent-v4       | 91                          | 114                          | 162                 | 70.99                      | 2.28                         | 57592119                 | 308098                   |
| MO_1084 | NA                        | 81%                        | Agilent-v4       | 154                         | 110                          | 147                 | 71.82                      | 2.05                         | 75313086                 | 304511                   |
| MO_1085 | 85%                       | 64%                        | Agilent-v4       | 147                         | 116                          | 62                  | 73.7                       | 0.84                         | 67372776                 | 300521                   |
| MO_1086 | 55%                       | 58%                        | Agilent-v4       | 139                         | 109                          | 57                  | 71.22                      | 0.8                          | 62578345                 | 296737                   |
| MO_1087 | 30%                       | 48%                        | Agilent-v4       | 143                         | 112                          | 424                 | 69.5                       | 6.1                          | 72090068                 | 329238                   |
| MO_1088 | 55-75%                    | 55%                        | Agilent-v4       | 156                         | 123                          | 45                  | 72.14                      | 0.62                         | 64766948                 | 278989                   |
| MO_1089 | 70%                       | 92%                        | Agilent-v4       | 177                         | 93                           | 84                  | 75.37                      | 1.11                         | 80824857                 | 303226                   |
| MO_1090 | 62%                       | 30%                        | Agilent-v4       | 95                          | 113                          | 127                 | 74.83                      | 1.7                          | 65756082                 | 383634                   |
| MO_1091 | 85%                       | 90%                        | Agilent-v4       | 179                         | 132                          | 250                 | 72.89                      | 3.43                         | 67631968                 | 315303                   |
| MO_1092 | 27%                       | 48%                        | Agilent-v4       | 191                         | 87                           | 660                 | 75.18                      | 8.78                         | 60338111                 | 318501                   |
| MO_1093 | 55%                       | 41%                        | Agilent-v4       | 161                         | 111                          | 86                  | 73.9                       | 1.16                         | 66627961                 | 319387                   |
| MO_1094 | 85%                       | 85%                        | Agilent-v4       | 161                         | 94                           | 100                 | 74.58                      | 1.34                         | 59697790                 | 308559                   |
| MO_1095 | 55%                       | 40%                        | Agilent-v4       | 159                         | 111                          | 101                 | 73.09                      | 1.38                         | 51558531                 | 304286                   |
| MO_1096 | 0%                        | 66%                        | Agilent-v4       | 159                         | 126                          | 129                 | 72.22                      | 1.79                         | 65794188                 | 293871                   |
| MO_1097 | 85%                       | 90%                        | Agilent-v4       | 170                         | 112                          | 429                 | 75.26                      | 5.7                          | 74576951                 | 320084                   |
| MO_1098 | 32%                       | 88%                        | Agilent-v4       | 168                         | 110                          | 157                 | 69.02                      | 2.27                         | 66160019                 | 318384                   |
| MO_1099 | 40%                       | 81%                        | Agilent-v4       | 176                         | 129                          | 2169                | 72.22                      | 30.03                        | 63154458                 | 324400                   |
| MO_1100 | 80-90%                    | 92%                        | Agilent-v4       | 192                         | 107                          | 96                  | 78.22                      | 1.23                         | 68170809                 | 306225                   |



Supplementary Table 2 cont. Sample Sequencing Statistics

| Case    | Tumor Content (Pathology) | Tumor Content (Sequencing) | Capture Platform | Mean Coverage (Tumor Exome) | Mean Coverage (Normal Exome) | Number of Mutations | Effective Target Size (Mb) | Mutation Rate (Mutations/Mb) | Transcriptome # of Reads | Splice Junctions Covered |
|---------|---------------------------|----------------------------|------------------|-----------------------------|------------------------------|---------------------|----------------------------|------------------------------|--------------------------|--------------------------|
| MO_1102 | 90%                       | 55%                        | Agilent-v4       | 116                         | 106                          | 1837                | 75.76                      | 24.25                        | 70161320                 | 314078                   |
| MO_1106 | 40%                       | 36%                        | Agilent-v4       | 198                         | 123                          | 805                 | 72.73                      | 11.07                        | 70624284                 | 325700                   |
| MO_1107 | 75%                       | 32%                        | Agilent-v4       | 162                         | 113                          | 221                 | 76.46                      | 2.89                         | 68335780                 | 319789                   |
| MO_1108 | 62%                       | 66%                        | Agilent-v4       | 179                         | 120                          | 479                 | 72.52                      | 6.61                         | 68959333                 | 338011                   |
| MO_1109 | 80%                       | 93%                        | Agilent-v4       | 174                         | 118                          | 4029                | 76.34                      | 52.78                        | 69741295                 | 355728                   |
| MO_1111 | 70%                       | 30%                        | Agilent-v4       | 162                         | 123                          | 3904                | 77.09                      | 50.64                        | 65259954                 | 326505                   |
| MO_1112 | 20%                       | 30%                        | Agilent-v4       | 119                         | 145                          | 52                  | 77.89                      | 0.67                         | 59110634                 | 266918                   |
| MO_1114 | 90%                       | 87%                        | Agilent-v4       | 188                         | 132                          | 157                 | 75.65                      | 2.08                         | 70540196                 | 300179                   |
| MO_1116 | 40-60%                    | 30%                        | Agilent-v4       | 184                         | 136                          | 557                 | 76.75                      | 7.26                         | 66268348                 | 274747                   |
| MO_1117 | 80-85%                    | 85%                        | Agilent-v4       | 141                         | 109                          | 181                 | 79.94                      | 2.26                         | 62631484                 | 295820                   |
| MO_1118 | 85-90%                    | 92%                        | Agilent-v4       | 182                         | 116                          | 99                  | 74.65                      | 1.33                         | 62077601                 | 312529                   |
| MO_1119 | 90%                       | 79%                        | Agilent-v4       | 172                         | 121                          | 338                 | 79.46                      | 4.25                         | 73719894                 | 295123                   |
| MO_1123 | 80%                       | 35%                        | Agilent-v4       | 174                         | 108                          | 109                 | 79.97                      | 1.36                         | 64925011                 | 266469                   |
| MO_1124 | 90%                       | 95%                        | Agilent-v4       | 121                         | 74                           | 152                 | 72.09                      | 2.11                         | 62498875                 | 310818                   |
| MO_1125 | 75-90%                    | 60%                        | Agilent-v4       | 125                         | 45                           | 776                 | 72.24                      | 10.74                        | 60400552                 | 285710                   |
| MO_1126 | 50-60%                    | 68%                        | Agilent-v4       | 176                         | 123                          | 200                 | 79.12                      | 2.53                         | 45915587                 | 280281                   |
| MO_1128 | 80-85%                    | 74%                        | Agilent-v4       | 173                         | 116                          | 129                 | 75.79                      | 1.7                          | 64268634                 | 272490                   |
| MO_1129 | 85%                       | 63%                        | Agilent-v4       | 157                         | 103                          | 112                 | 79.98                      | 1.4                          | 70848490                 | 291387                   |
| MO_1130 | 13%                       | 43%                        | Agilent-v4       | 157                         | 120                          | 102                 | 77.25                      | 1.32                         | 89071125                 | 300590                   |
| MO_1131 | 90%                       | 80%                        | Agilent-v4       | 164                         | 113                          | 90                  | 75.6                       | 1.19                         | 72360405                 | 282940                   |
| MO_1132 | 3-5%                      | 40%                        | Agilent-v4       | 170                         | 132                          | 169                 | 77.96                      | 2.17                         | 74833596                 | 317610                   |
| MO_1133 | 80%                       | 93%                        | Agilent-v4       | 171                         | 113                          | 93                  | 77.41                      | 1.2                          | 60069940                 | 278648                   |
| MO_1135 | 63-65%                    | 58%                        | Agilent-v4       | 166                         | 135                          | 543                 | 78.32                      | 6.93                         | 63508081                 | 274856                   |
| MO_1136 | 80-85%                    | 30%                        | Agilent-v4       | 182                         | 132                          | 118                 | 80.17                      | 1.47                         | 77159735                 | 267746                   |
| MO_1137 | 90%                       | 32%                        | Agilent-v4       | 182                         | 125                          | 344                 | 78.2                       | 4.4                          | 67930905                 | 301342                   |
| MO_1138 | 80%                       | 50%                        | Agilent-v4       | 237                         | 105                          | 129                 | 79.49                      | 1.62                         | 43953848                 | 260656                   |
| MO_1139 | 0%                        | 30%                        | Agilent-v4       | 159                         | 97                           | 103                 | 77.97                      | 1.32                         | NA                       | NA                       |
| MO_1140 | 80%                       | 95%                        | Agilent-v4       | 157                         | 140                          | 179                 | 72                         | 2.49                         | 42196014                 | 233094                   |
| MO_1141 | 60%                       | 71%                        | Agilent-v4       | 176                         | 115                          | 800                 | 72.19                      | 11.08                        | 47498009                 | 271491                   |
| MO_1142 | 35-50%                    | 35%                        | Agilent-v4       | 197                         | 120                          | 76                  | 75.16                      | 1.01                         | NA                       | NA                       |
| MO_1146 | 75%                       | 35%                        | Agilent-v4       | 177                         | 133                          | 7691                | 73.94                      | 104.02                       | 60849094                 | 297111                   |
| MO_1147 | 35%                       | 30%                        | Agilent-v4       | 174                         | 130                          | 46                  | 76.88                      | 0.6                          | 80695465                 | 316114                   |
| MO_1148 | 85%                       | 98%                        | Agilent-v4       | 180                         | 120                          | 94                  | 78                         | 1.21                         | 61278552                 | 287827                   |
| MO_1149 | 45-75%                    | 63%                        | Agilent-v4       | 168                         | 139                          | 61                  | 75.09                      | 0.81                         | 66606905                 | 308953                   |
| MO_1150 | NA                        | 55%                        | Agilent-v4       | 188                         | 138                          | 148                 | 79.89                      | 1.85                         | NA                       | NA                       |
| MO_1152 | 75%                       | 33%                        | Agilent-v4       | 183                         | 131                          | 124                 | 75.24                      | 1.65                         | 68461266                 | 297799                   |
| MO_1153 | 80-90%                    | 57%                        | Agilent-v4       | 198                         | 130                          | 1150                | 73.68                      | 15.61                        | 65432669                 | 317172                   |
| MO_1155 | 45-65%                    | 90%                        | Agilent-v4       | 188                         | 135                          | 62                  | 80.67                      | 0.77                         | 78454689                 | 294663                   |
| MO_1157 | 75-85%                    | 90%                        | Agilent-v4       | 180                         | 137                          | 154                 | 76.95                      | 2                            | 73522643                 | 300851                   |
| MO_1158 | 63%                       | 54%                        | Agilent-v4       | 190                         | 152                          | 128                 | 79.64                      | 1.61                         | 72136490                 | 327574                   |
| MO_1159 | 80-85%                    | 85%                        | Agilent-v4       | 190                         | 138                          | 252                 | 78.95                      | 3.19                         | 68475707                 | 290116                   |

Supplementary Table 2 cont. Sample Sequencing Statistics

| Case    | Tumor Content (Pathology) | Tumor Content (Sequencing) | Capture Platform | Mean Coverage (Tumor Exome) | Mean Coverage (Normal Exome) | Number of Mutations | Effective Target Size (Mb) | Mutation Rate (Mutations/Mb) | Transcriptome # of Reads | Splice Junctions Covered |
|---------|---------------------------|----------------------------|------------------|-----------------------------|------------------------------|---------------------|----------------------------|------------------------------|--------------------------|--------------------------|
| MO_1160 | 65-70%                    | 70%                        | Agilent-v4       | 194                         | 146                          | 5387                | 78.85                      | 68.32                        | 77278378                 | 355476                   |
| MO_1161 | 80%                       | 82%                        | Agilent-v4       | 184                         | 145                          | 156                 | 80.52                      | 1.94                         | 61678612                 | 295351                   |
| MO_1162 | 7-45%                     | 63%                        | Agilent-v4       | 198                         | 136                          | 166                 | 76.24                      | 2.18                         | 83447148                 | 324569                   |
| MO_1163 | 65-75%                    | 82%                        | Agilent-v4       | 175                         | 136                          | 1530                | 75.46                      | 20.28                        | 60547356                 | 324529                   |
| MO_1164 | 75%                       | 37%                        | Agilent-v4       | 191                         | 153                          | 134                 | 77.8                       | 1.72                         | 65349000                 | 314475                   |
| MO_1165 | 45%                       | 74%                        | Agilent-v4       | 176                         | 123                          | 157                 | 72.9                       | 2.15                         | 58791548                 | 310224                   |
| MO_1166 | 37-45%                    | 30%                        | Agilent-v4       | 200                         | 139                          | 423                 | 72.33                      | 5.85                         | 73916404                 | 323293                   |
| MO_1167 | 80%                       | 31%                        | Agilent-v4       | 183                         | 127                          | 113                 | 77.52                      | 1.46                         | 60134261                 | 313311                   |
| MO_1168 | 63-65%                    | 65%                        | Agilent-v4       | 169                         | 135                          | 117                 | 66.11                      | 1.77                         | 73689804                 | 242686                   |
| MO_1170 | 50%                       | 62%                        | Agilent-v4       | 167                         | 127                          | 105                 | 78.11                      | 1.34                         | 56795974                 | 301152                   |
| MO_1171 | 60%                       | 59%                        | Agilent-v4       | 158                         | 134                          | 101                 | 76.93                      | 1.31                         | 61897626                 | 364136                   |
| MO_1172 | 15%                       | 48%                        | Agilent-v4       | 200                         | 141                          | 101                 | 83.42                      | 1.21                         | 72865750                 | 308916                   |
| MO_1175 | 50-70%                    | 37%                        | Agilent-v4       | 169                         | 131                          | 284                 | 80.14                      | 3.54                         | 42415609                 | 274117                   |
| MO_1176 | 70-80%                    | 83%                        | Agilent-v4       | 174                         | 126                          | 168                 | 74.84                      | 2.24                         | 40692914                 | 273442                   |
| MO_1177 | 10-30%                    | 49%                        | Agilent-v4       | 170                         | 126                          | 207                 | 74.77                      | 2.77                         | 45393687                 | 292232                   |
| MO_1178 | 70%                       | 55%                        | Agilent-v4       | 174                         | 133                          | 1692                | 80.23                      | 21.09                        | 44385718                 | 280120                   |
| MO_1179 | 5%                        | 30%                        | Agilent-v4       | 162                         | 131                          | 165                 | 74.62                      | 2.21                         | 45319650                 | 290372                   |
| MO_1180 | 55-63%                    | 81%                        | Agilent-v4       | 162                         | 143                          | 68                  | 77.38                      | 0.88                         | 43743139                 | 261961                   |
| MO_1181 | 65-73%                    | 75%                        | Agilent-v4       | 203                         | 112                          | 208                 | 74.88                      | 2.78                         | 44312081                 | 274339                   |
| MO_1182 | 80%                       | 76%                        | Agilent-v4       | 185                         | 115                          | 200                 | 77.83                      | 2.57                         | 44218716                 | 277729                   |
| MO_1183 | 85%                       | 58%                        | Agilent-v4       | 209                         | 106                          | 4520                | 77.81                      | 58.09                        | 49347329                 | 275330                   |
| MO_1184 | 45%                       | 56%                        | Agilent-v4       | 157                         | 134                          | 287                 | 78.04                      | 3.68                         | 43835260                 | 276040                   |
| MO_1185 | NA                        | 81%                        | Agilent-v4       | 158                         | 114                          | 203                 | 75.84                      | 2.68                         | 47142667                 | 265647                   |
| MO_1187 | 60-75%                    | 69%                        | Agilent-v4       | 154                         | 129                          | 432                 | 72.22                      | 5.98                         | 39669648                 | 275909                   |
| MO_1188 | 67-90%                    | 30%                        | Agilent-v4       | 132                         | 84                           | 873                 | 74.34                      | 11.74                        | 40942758                 | 252229                   |
| MO_1189 | 80%                       | 43%                        | Agilent-v4       | 183                         | 96                           | 721                 | 77.66                      | 9.28                         | 62904603                 | 290624                   |
| MO_1190 | 80%                       | 77%                        | Agilent-v4       | 146                         | 88                           | 1500                | 74.94                      | 20.02                        | 47516336                 | 289148                   |
| MO_1192 | 70%                       | 67%                        | Agilent-v4       | 174                         | 116                          | 116                 | 77.55                      | 1.5                          | 42038509                 | 265457                   |
| MO_1193 | 73%                       | 63%                        | Agilent-v4       | 156                         | 124                          | 52                  | 76.16                      | 0.68                         | 109380616                | 351336                   |
| MO_1194 | 63%                       | 32%                        | Agilent-v4       | 147                         | 106                          | 159                 | 74.67                      | 2.13                         | 66116968                 | 323519                   |
| MO_1195 | 63-85%                    | 54%                        | Agilent-v4       | 194                         | 140                          | 226                 | 78.93                      | 2.86                         | 61074049                 | 305091                   |
| MO_1196 | 45-50%                    | 34%                        | Agilent-v4       | 181                         | 120                          | 101                 | 76.65                      | 1.32                         | 43966431                 | 272644                   |
| MO_1197 | 45-90%                    | 68%                        | Agilent-v4       | 151                         | 115                          | 1006                | 73.47                      | 13.69                        | 40558290                 | 263572                   |
| MO_1198 | 45-55%                    | 48%                        | Agilent-v4       | 139                         | 105                          | 930                 | 72.07                      | 12.9                         | 41307702                 | 289278                   |
| MO_1200 | 65%                       | 30%                        | Agilent-v4       | 159                         | 125                          | 167                 | 76.5                       | 2.18                         | 48201927                 | 290377                   |
| MO_1201 | 10%                       | 47%                        | Agilent-v4       | 195                         | 131                          | 94                  | 78.23                      | 1.2                          | 64573400                 | 290421                   |
| MO_1202 | 55-65%                    | 52%                        | Agilent-v4       | 174                         | 126                          | 166                 | 81.23                      | 2.04                         | 66690987                 | 317987                   |
| MO_1203 | 55-60%                    | 30%                        | Agilent-v4       | 190                         | 136                          | 123                 | 75.6                       | 1.63                         | 66909881                 | 298070                   |
| MO_1204 | 10-15%                    | 58%                        | Agilent-v4       | 192                         | 127                          | 577                 | 78.1                       | 7.39                         | 66588925                 | 300798                   |
| MO_1206 | 70-80%                    | 84%                        | Agilent-v4       | 179                         | 123                          | 532                 | 73.83                      | 7.21                         | 69744643                 | 303762                   |
| MO_1208 | 90%                       | 71%                        | Agilent-v4       | 181                         | 103                          | 195                 | 78.05                      | 2.5                          | 70866789                 | 316160                   |

Supplementary Table 2 cont. Sample Sequencing Statistics

| Case    | Tumor Content<br>(Pathology) | Tumor Content<br>(Sequencing) | Capture<br>Platform | Mean Coverage<br>(Tumor Exome) | Mean Coverage<br>(Normal Exome) | Number of<br>Mutations | Effective Target<br>Size (Mb) | Mutation Rate<br>(Mutations/Mb) | Transcriptome<br># of Reads | Splice Junctions<br>Covered |
|---------|------------------------------|-------------------------------|---------------------|--------------------------------|---------------------------------|------------------------|-------------------------------|---------------------------------|-----------------------------|-----------------------------|
| MO_1209 | 30%                          | 30%                           | Agilent-v4          | 186                            | 110                             | 1580                   | 78.94                         | 20.02                           | 56906950                    | 303538                      |
| MO_1210 | 85-90%                       | 70%                           | Agilent-v4          | 176                            | 110                             | 92                     | 80.87                         | 1.14                            | 64231867                    | 265499                      |
| MO_1211 | 70-75%                       | 85%                           | Agilent-v4          | 192                            | 108                             | 60                     | 82.8                          | 0.72                            | 63834470                    | 305049                      |
| MO_1213 | 55%                          | 74%                           | Agilent-v4          | 175                            | 127                             | 101                    | 77.07                         | 1.31                            | 52146710                    | 279393                      |
| MO_1214 | NA                           | <30%                          | Agilent-v4          | 164                            | 116                             | 223                    | 79.67                         | 2.8                             | 52099578                    | 274939                      |
| MO_1215 | 45-73%                       | 87%                           | Agilent-v4          | 167                            | 124                             | 302                    | 78.3                          | 3.86                            | 50277867                    | 320571                      |
| MO_1217 | 65-75%                       | 30%                           | Agilent-v4          | 172                            | 138                             | 2978                   | 81.06                         | 36.74                           | 89474941                    | 346416                      |
| MO_1219 | 35%                          | 30%                           | Agilent-v4          | 308                            | 219                             | 150                    | 85.18                         | 1.76                            | 46003592                    | 279124                      |
| MO_1220 | 45-63%                       | 34%                           | Agilent-v4          | 226                            | 96                              | 1171                   | 83.08                         | 14.1                            | 54119326                    | 328693                      |
| MO_1221 | 4-5%                         | 78%                           | Agilent-v4          | 196                            | 103                             | 130                    | 81.85                         | 1.59                            | 44733586                    | 266814                      |
| MO_1222 | 45-50%                       | <30%                          | Agilent-v4          | 145                            | 102                             | 51                     | 78.01                         | 0.65                            | 55239889                    | 265444                      |
| MO_1223 | 30-35%                       | 39%                           | Agilent-v4          | 160                            | 102                             | 646                    | 79.45                         | 8.13                            | 43968644                    | 265445                      |
| MO_1224 | 50-70%                       | 48%                           | Agilent-v4          | 151                            | 107                             | 537                    | 79.78                         | 6.73                            | 43566698                    | 277469                      |
| MO_1226 | 50%                          | 46%                           | Agilent-v4          | 161                            | 96                              | 238                    | 80.97                         | 2.94                            | 44834789                    | 279670                      |
| MO_1227 | 50%                          | 76%                           | Agilent-v4          | 154                            | 100                             | 1023                   | 80.85                         | 12.65                           | 49156975                    | 268550                      |
| MO_1228 | 70%                          | 68%                           | Agilent-v4          | 165                            | 117                             | 4795                   | 81.66                         | 58.72                           | 45750654                    | 278955                      |
| MO_1229 | 13-23%                       | 65%                           | Agilent-v4          | 166                            | 119                             | 83                     | 80.88                         | 1.03                            | 45673682                    | 267427                      |
| MO_1230 | 50-55%                       | 53%                           | Agilent-v4          | 169                            | 117                             | 106                    | 81.73                         | 1.3                             | 47128821                    | 276452                      |
| MO_1231 | 55-75%                       | <30%                          | Agilent-v4          | 170                            | 112                             | 114                    | 78.7                          | 1.45                            | 72871182                    | 308604                      |
| MO_1232 | 37-50%                       | 47%                           | Agilent-v4          | 164                            | 126                             | 498                    | 80.18                         | 6.21                            | 49279541                    | 286917                      |
| MO_1233 | 55-60%                       | 93%                           | Agilent-v4          | 149                            | 107                             | 63                     | 78.31                         | 0.8                             | 49268156                    | 279630                      |
| MO_1236 | 15%                          | 45%                           | Agilent-v4          | 180                            | 105                             | 635                    | 78.55                         | 8.08                            | 61779667                    | 337093                      |
| MO_1237 | 70-75%                       | 55%                           | Agilent-v4          | 157                            | 130                             | 104                    | 74.75                         | 1.39                            | 70501005                    | 311273                      |
| MO_1239 | 80-90%                       | 84%                           | Agilent-v4          | 143                            | 106                             | 553                    | 77.04                         | 7.18                            | 58907627                    | 299189                      |
| MO_1240 | 13%                          | 67%                           | Agilent-v4          | 190                            | 99                              | 104                    | 79.83                         | 1.3                             | 65314138                    | 279041                      |
| MO_1241 | 65-75%                       | 80%                           | Agilent-v4          | 163                            | 109                             | 124                    | 78.61                         | 1.58                            | 50112628                    | 295695                      |
| MO_1244 | 65-75%                       | 94%                           | Agilent-v4          | 160                            | 103                             | 121                    | 77.13                         | 1.57                            | 66805500                    | 295504                      |
| MO_1245 | 70-75%                       | 84%                           | Agilent-v4          | 180                            | 114                             | 89                     | 79.96                         | 1.11                            | 66483549                    | 303323                      |
| MO_1247 | 80-85%                       | 82%                           | Agilent-v4          | 166                            | 127                             | 93                     | 79.92                         | 1.16                            | 69326289                    | 306634                      |
| MO_1248 | 60-70%                       | 62%                           | Agilent-v4          | 179                            | 107                             | 143                    | 81.48                         | 1.75                            | 69097056                    | 331632                      |
| MO_1249 | 60-70%                       | 30%                           | Agilent-v4          | 179                            | 116                             | 180                    | 80.81                         | 2.23                            | 64086703                    | 292125                      |
| MO_1250 | 50%                          | 79%                           | Agilent-v4          | 145                            | 92                              | 227                    | 80.14                         | 2.83                            | 64464392                    | 299154                      |
| MO_1251 | 80%                          | 48%                           | Agilent-v4          | 167                            | 127                             | 153                    | 81.07                         | 1.89                            | 67752009                    | 298836                      |
| MO_1252 | 65-80%                       | 88%                           | Agilent-v4          | 159                            | 112                             | 186                    | 80.49                         | 2.31                            | 54812082                    | 295386                      |
| MO_1253 | 35%                          | 30%                           | Agilent-v4          | 169                            | 107                             | 298                    | 85.19                         | 3.5                             | 60400747                    | 302176                      |
| MO_1256 | 75-80%                       | 39%                           | Agilent-v4          | 168                            | 116                             | 818                    | 79.07                         | 10.35                           | 66908687                    | 313571                      |
| MO_1260 | 15-35%                       | 71%                           | Agilent-v4          | 175                            | 118                             | 1292                   | 80.31                         | 16.09                           | 57956333                    | 300139                      |
| MO_1262 | 60%                          | 84%                           | Agilent-v4          | 183                            | 123                             | 181                    | 79.7                          | 2.27                            | 62492158                    | 285841                      |
| MO_1263 | 15-23%                       | 30%                           | Agilent-v4          | 172                            | 134                             | 146                    | 75.76                         | 1.93                            | 69585210                    | 325315                      |
| MO_1264 | 55-65%                       | 30%                           | Agilent-v4          | 178                            | 109                             | 165                    | 80.79                         | 2.04                            | 72249637                    | 295287                      |
| MO_1265 | 20-50%                       | 85%                           | Agilent-v4          | 182                            | 118                             | 315                    | 78.53                         | 4.01                            | 66299066                    | 292436                      |

Supplementary Table 2 cont. Sample Sequencing Statistics

| Case    | Tumor Content<br>(Pathology) | Tumor Content<br>(Sequencing) | Capture<br>Platform | Mean Coverage<br>(Tumor Exome) | Mean Coverage<br>(Normal Exome) | Number of<br>Mutations | Effective Target<br>Size (Mb) | Mutation Rate<br>(Mutations/Mb) | Transcriptome<br># of Reads | Splice Junctions<br>Covered |
|---------|------------------------------|-------------------------------|---------------------|--------------------------------|---------------------------------|------------------------|-------------------------------|---------------------------------|-----------------------------|-----------------------------|
| MO_1266 | 27-65%                       | 38%                           | Agilent-v4          | 176                            | 122                             | 1325                   | 78.6                          | 16.86                           | 68827669                    | 316570                      |
| MO_1267 | 45%                          | 42%                           | Agilent-v4          | 198                            | 130                             | 382                    | 81.71                         | 4.68                            | 69212038                    | 322263                      |
| MO_1268 | 65-70%                       | 31%                           | Agilent-v4          | 215                            | 126                             | 416                    | 82.7                          | 5.03                            | 65865018                    | 316065                      |
| MO_1269 | 67-80%                       | 63%                           | Agilent-v4          | 186                            | 131                             | 989                    | 76.35                         | 12.95                           | 72488499                    | 304109                      |
| MO_1271 | 40-73%                       | 34%                           | Agilent-v4          | 173                            | 114                             | 2175                   | 82.06                         | 26.5                            | 54953683                    | 300842                      |
| MO_1272 | 9%                           | 36%                           | Agilent-v4          | 164                            | 112                             | 108                    | 77.37                         | 1.4                             | 77940007                    | 297461                      |
| MO_1274 | 30-55%                       | 78%                           | Agilent-v4          | 170                            | 124                             | 206                    | 82.91                         | 2.48                            | 60779866                    | 323610                      |
| MO_1276 | 10-27%                       | 30%                           | Agilent-v4          | 172                            | 116                             | 144                    | 82.87                         | 1.74                            | 74957138                    | 328406                      |
| MO_1277 | 10-70%                       | 86%                           | Agilent-v4          | 163                            | 111                             | 144                    | 80.84                         | 1.78                            | 65713039                    | 285947                      |
| MO_1278 | 27-37%                       | <30%                          | Agilent-v4          | 128                            | 104                             | 43                     | 81.14                         | 0.53                            | 59390751                    | 313834                      |
| MO_1279 | 5-9%                         | 30%                           | Agilent-v4          | 156                            | 121                             | 467                    | 79.66                         | 5.86                            | 69381090                    | 244065                      |
| MO_1283 | 60-65%                       | 93%                           | Agilent-v4          | 160                            | 105                             | 102                    | 81.04                         | 1.26                            | 62110325                    | 323264                      |
| MO_1284 | 75-83%                       | 81%                           | Agilent-v4          | 163                            | 105                             | 119                    | 80.69                         | 1.47                            | 69181891                    | 314641                      |
| MO_1285 | 50-65%                       | 42%                           | Agilent-v4          | 148                            | 103                             | 79                     | 80.61                         | 0.98                            | 64508797                    | 311497                      |
| MO_1286 | 65-70%                       | 67%                           | Agilent-v4          | 159                            | 125                             | 178                    | 83.21                         | 2.14                            | 64329811                    | 320631                      |
| MO_1287 | 73-85%                       | 71%                           | Agilent-v4          | 154                            | 127                             | 251                    | 81.56                         | 3.08                            | 66830105                    | 302998                      |
| MO_1288 | 15-25%                       | 30%                           | Agilent-v4          | 160                            | 105                             | 512                    | 83.33                         | 6.14                            | 63849582                    | 313380                      |
| MO_1289 | 90%                          | 58%                           | Agilent-v4          | 159                            | 130                             | 181                    | 83.41                         | 2.17                            | 62919242                    | 291503                      |
| MO_1290 | 65%                          | 81%                           | Agilent-v4          | 153                            | 124                             | 335                    | 81.22                         | 4.12                            | 60591879                    | 350551                      |
| MO_1292 | 70-85%                       | 68%                           | Agilent-v4          | 171                            | 90                              | 229                    | 83.32                         | 2.75                            | 52799955                    | 298090                      |
| MO_1294 | 73%                          | 38%                           | Agilent-v4          | 135                            | 109                             | 549                    | 80.88                         | 6.79                            | 59616935                    | 328031                      |
| MO_1295 | 23-63%                       | 30%                           | Agilent-v4          | 154                            | 108                             | 63                     | 80.84                         | 0.78                            | 68454199                    | 313574                      |
| MO_1296 | 65-67%                       | 62%                           | Agilent-v4          | 144                            | 117                             | 195                    | 82.94                         | 2.35                            | 57880123                    | 300381                      |
| MO_1297 | 57-80%                       | 75%                           | Agilent-v4          | 157                            | 112                             | 108                    | 82.85                         | 1.3                             | 67608957                    | 321750                      |
| MO_1298 | 85%                          | 96%                           | Agilent-v4          | 153                            | 123                             | 264                    | 82.74                         | 3.19                            | 63566916                    | 304800                      |
| MO_1300 | 70%                          | 71%                           | Agilent-v4          | 162                            | 110                             | 971                    | 81.91                         | 11.85                           | 64209106                    | 305925                      |
| MO_1301 | 75%                          | 74%                           | Agilent-v4          | 158                            | 105                             | 324                    | 81.74                         | 3.96                            | 58525759                    | 308676                      |
| MO_1302 | NA                           | 36%                           | Agilent-v4          | 151                            | 98                              | 336                    | 79.26                         | 4.24                            | 58535434                    | 322275                      |
| MO_1304 | 10-20%                       | 39%                           | Agilent-v4          | 155                            | 106                             | 4243                   | 83.71                         | 50.69                           | 66353420                    | 307189                      |
| MO_1305 | 73-90%                       | 75%                           | Agilent-v4          | 153                            | 114                             | 102                    | 81.41                         | 1.25                            | 70598159                    | 309650                      |
| MO_1306 | 25-30%                       | 51%                           | Agilent-v4          | 175                            | 111                             | 233                    | 82.97                         | 2.81                            | 65259132                    | 318371                      |
| MO_1307 | 40-80%                       | 47%                           | Agilent-v4          | 162                            | 112                             | 11764                  | 83.67                         | 140.6                           | 62438948                    | 305418                      |
| MO_1309 | 45%                          | 30%                           | Agilent-v4          | 164                            | 97                              | 491                    | 80.85                         | 6.07                            | 61827432                    | 297750                      |
| MO_1310 | 22%                          | 30%                           | Agilent-v4          | 157                            | 103                             | 144                    | 82.5                          | 1.75                            | 64320430                    | 282139                      |
| MO_1312 | 45%                          | 35%                           | Agilent-v4          | 163                            | 107                             | 159                    | 82.21                         | 1.93                            | 63731471                    | 302033                      |
| MO_1313 | 4-13%                        | 78%                           | Agilent-v4          | 172                            | 116                             | 157                    | 79.99                         | 1.96                            | 72135138                    | 344773                      |
| MO_1315 | 13%                          | 39%                           | Agilent-v4          | 98                             | 120                             | 135                    | 72.15                         | 1.87                            | 102948295                   | 350576                      |
| MO_1316 | 85%                          | 85%                           | Agilent-v4          | 93                             | 109                             | 144                    | 75.73                         | 1.9                             | 114982323                   | 339571                      |
| MO_1317 | 65-85%                       | 67%                           | Agilent-v4          | 104                            | 115                             | 271                    | 73.54                         | 3.69                            | 123821158                   | 363279                      |
| MO_1318 | 85%                          | 77%                           | Agilent-v4          | 90                             | 108                             | 254                    | 72.54                         | 3.5                             | 120990896                   | 357082                      |
| MO_1319 | 90%                          | 83%                           | Agilent-v4          | 171                            | 122                             | 87                     | 82.78                         | 1.05                            | 64659472                    | 296618                      |

Supplementary Table 2 cont. Sample Sequencing Statistics

| Case    | Tumor Content (Pathology) | Tumor Content (Sequencing) | Capture Platform | Mean Coverage (Tumor Exome) | Mean Coverage (Normal Exome) | Number of Mutations | Effective Target Size (Mb) | Mutation Rate (Mutations/Mb) | Transcriptome # of Reads | Splice Junctions Covered |
|---------|---------------------------|----------------------------|------------------|-----------------------------|------------------------------|---------------------|----------------------------|------------------------------|--------------------------|--------------------------|
| MO_1320 | 63%                       | 68%                        | Agilent-v4       | 183                         | 114                          | 173                 | 82.75                      | 2.09                         | 58935388                 | 320223                   |
| MO_1322 | 37%                       | 30%                        | Agilent-v4       | 160                         | 118                          | 151                 | 82.17                      | 1.84                         | 69325277                 | 304115                   |
| MO_1323 | 40-45%                    | 68%                        | Agilent-v4       | 178                         | 99                           | 90                  | 82.91                      | 1.09                         | 53217319                 | 274629                   |
| MO_1324 | 50-55%                    | 64%                        | Agilent-v4       | 182                         | 98                           | 222                 | 82.89                      | 2.68                         | 65143184                 | 323491                   |
| MO_1325 | 45-65%                    | 30%                        | Agilent-v4       | 167                         | 110                          | 600                 | 83.24                      | 7.21                         | 69317369                 | 286048                   |
| MO_1328 | 45-55%                    | 78%                        | Agilent-v4       | 152                         | 103                          | 911                 | 78.27                      | 11.64                        | 60499715                 | 311228                   |
| MO_1329 | 25-60%                    | 30%                        | Agilent-v4       | 157                         | 93                           | 88                  | 83.35                      | 1.06                         | 63823168                 | 281169                   |
| MO_1330 | 55-80%                    | 40%                        | Agilent-v4       | 137                         | 100                          | 963                 | 79.81                      | 12.07                        | 57175313                 | 300951                   |
| MO_1331 | 55-65%                    | 62%                        | Agilent-v4       | 163                         | 152                          | 382                 | 79.15                      | 4.83                         | 55484872                 | 306867                   |
| MO_1333 | 55-65%                    | 75%                        | Agilent-v4       | 165                         | 134                          | 540                 | 80.9                       | 6.68                         | 54450321                 | 326928                   |
| MO_1335 | 55-70%                    | 71%                        | Agilent-v4       | 178                         | 151                          | 213                 | 80.63                      | 2.64                         | 44182085                 | 300404                   |
| MO_1336 | 0%                        | 50%                        | Agilent-v4       | 150                         | 122                          | 120                 | 78.43                      | 1.53                         | 53626008                 | 331418                   |
| MO_1337 | 45-50%                    | 84%                        | Agilent-v4       | 175                         | 134                          | 148                 | 82.02                      | 1.8                          | 56351772                 | 324544                   |
| MO_1338 | 80-85%                    | 77%                        | Agilent-v4       | 194                         | 125                          | 342                 | 82.76                      | 4.13                         | 50856182                 | 326496                   |
| MO_1339 | 55-65%                    | 63%                        | Agilent-v4       | 189                         | 150                          | 178                 | 82.04                      | 2.17                         | 49586311                 | 310507                   |
| MO_1340 | NA                        | 82%                        | Agilent-v4       | 187                         | 126                          | 472                 | 85.35                      | 5.53                         | 71417273                 | 320731                   |
| MO_1341 | 10-17%                    | 52%                        | Agilent-v4       | 178                         | 163                          | 76                  | 82.76                      | 0.92                         | 48320993                 | 289888                   |
| MO_1342 | 45%                       | 81%                        | Agilent-v4       | 175                         | 126                          | 313                 | 82.58                      | 3.79                         | 58477872                 | 342646                   |
| MO_1343 | 7%                        | 64%                        | Agilent-v4       | 44                          | 99                           | 208                 | 60.67                      | 3.43                         | 61702138                 | 228563                   |
| MO_1344 | 35-85%                    | 91%                        | Agilent-v4       | 158                         | 128                          | 102                 | 82.73                      | 1.23                         | 38970748                 | 281593                   |
| MO_1345 | 70-75%                    | 83%                        | Agilent-v4       | 173                         | 124                          | 544                 | 81.36                      | 6.69                         | 49498016                 | 288482                   |
| MO_1346 | 85%                       | 51%                        | Agilent-v4       | 172                         | 139                          | 201                 | 83.35                      | 2.41                         | 49167765                 | 280412                   |
| MO_1347 | 45-70%                    | 30%                        | Agilent-v4       | 177                         | 134                          | 16107               | 83.98                      | 191.8                        | 57699120                 | 333225                   |
| MO_1355 | 55-63%                    | 78%                        | Agilent-v4       | 149                         | 94                           | 282                 | 81.27                      | 3.47                         | 63111865                 | 285160                   |
| MO_1357 | 55%                       | 30%                        | Agilent-v4       | 141                         | 95                           | 1289                | 80.98                      | 15.92                        | 60299683                 | 281613                   |
| MO_1359 | 70-75%                    | 77%                        | Agilent-v4       | 129                         | 112                          | 388                 | 78.53                      | 4.94                         | 61143664                 | 314136                   |
| MO_1360 | 55%                       | 68%                        | Agilent-v4       | 124                         | 106                          | 318                 | 80.12                      | 3.97                         | 66823973                 | 306081                   |
| MO_1361 | 45-70%                    | 40%                        | Agilent-v4       | 157                         | 121                          | 235                 | 84.08                      | 2.8                          | 69535887                 | 271817                   |
| MO_1362 | 45%                       | 30%                        | Agilent-v4       | 99                          | 104                          | 114                 | 83.08                      | 1.37                         | NA                       | NA                       |
| MO_1363 | 80-85%                    | 54%                        | Agilent-v4       | 161                         | 124                          | 7062                | 84.89                      | 83.19                        | 40537192                 | 264796                   |
| MO_1364 | 50-70%                    | 72%                        | Agilent-v4       | 196                         | 138                          | 243                 | 84.88                      | 2.86                         | 53783417                 | 289279                   |
| MO_1366 | 75-80%                    | 67%                        | Agilent-v4       | 210                         | 136                          | 785                 | 85.38                      | 9.19                         | 43592957                 | 261690                   |
| MO_1367 | 55%                       | 30%                        | Agilent-v4       | 200                         | 115                          | 293                 | 85.62                      | 3.42                         | 56559375                 | 287397                   |
| MO_1369 | 30-33%                    | 81%                        | Agilent-v4       | 194                         | 167                          | 149                 | 85.74                      | 1.74                         | 59799088                 | 302409                   |
| MO_1370 | 85-90%                    | 90%                        | Agilent-v4       | 216                         | 173                          | 400                 | 85.26                      | 4.69                         | 56037056                 | 307833                   |
| MO_1371 | 55-63%                    | 64%                        | Agilent-v4       | 182                         | 165                          | 96                  | 85.59                      | 1.12                         | 62053059                 | 287960                   |
| MO_1372 | 55-73%                    | 88%                        | Agilent-v4       | 233                         | 137                          | 276                 | 85.94                      | 3.21                         | 53580211                 | 329768                   |
| MO_1373 | 10-50%                    | 30%                        | Agilent-v4       | 133                         | 102                          | 254                 | 83.05                      | 3.06                         | 61584423                 | 254895                   |
| MO_1374 | 60%                       | 42%                        | Agilent-v4       | 216                         | 131                          | 802                 | 86.07                      | 9.32                         | 44800506                 | 269759                   |
| MO_1375 | 45-67%                    | 68%                        | Agilent-v4       | 186                         | 144                          | 427                 | 84.77                      | 5.04                         | 48408517                 | 283389                   |
| MO_1376 | 40%                       | 38%                        | Agilent-v4       | 207                         | 167                          | 227                 | 85.89                      | 2.64                         | 43080945                 | 263101                   |

Supplementary Table 2 cont. Sample Sequencing Statistics

| Case    | Tumor Content (Pathology) | Tumor Content (Sequencing) | Capture Platform | Mean Coverage (Tumor Exome) | Mean Coverage (Normal Exome) | Number of Mutations | Effective Target Size (Mb) | Mutation Rate (Mutations/Mb) | Transcriptome # of Reads | Splice Junctions Covered |
|---------|---------------------------|----------------------------|------------------|-----------------------------|------------------------------|---------------------|----------------------------|------------------------------|--------------------------|--------------------------|
| MO_1377 | 30-60%                    | 47%                        | Agilent-v4       | 147                         | 99                           | 126                 | 83.8                       | 1.5                          | 67241167                 | 279519                   |
| MO_1378 | 40-60%                    | 54%                        | Agilent-v4       | 162                         | 108                          | 282                 | 84.73                      | 3.33                         | 55642892                 | 266816                   |
| MO_1379 | 35-40%                    | 43%                        | Agilent-v4       | 212                         | 150                          | 94                  | 85.81                      | 1.1                          | 75370031                 | 329374                   |
| MO_1380 | 10-15%                    | 36%                        | Agilent-v4       | 260                         | 140                          | 484                 | 85.98                      | 5.63                         | 84180118                 | 367159                   |
| MO_1381 | 20-40%                    | <30%                       | Agilent-v4       | 197                         | 166                          | 66                  | 85.32                      | 0.77                         | 68106742                 | 356553                   |
| MO_1382 | 60-80%                    | 92%                        | Agilent-v4       | 225                         | 169                          | 119                 | 85.52                      | 1.39                         | 66846965                 | 322147                   |
| MO_1383 | 20%                       | 30%                        | Agilent-v4       | 158                         | 121                          | 139                 | 84.58                      | 1.64                         | 69370813                 | 311310                   |
| MO_1384 | 30-45%                    | 36%                        | Agilent-v4       | 228                         | 139                          | 208                 | 86.13                      | 2.41                         | 76578426                 | 337191                   |
| MO_1385 | 40%                       | 60%                        | Agilent-v4       | 211                         | 152                          | 102                 | 85.96                      | 1.19                         | 70476601                 | 346637                   |
| MO_1386 | 13%                       | 30%                        | Agilent-v4       | 240                         | 163                          | 62                  | 86.38                      | 0.72                         | 70890227                 | 359851                   |
| MO_1387 | 12%                       | 30%                        | Agilent-v4       | 222                         | 191                          | 90                  | 85.56                      | 1.05                         | 65195190                 | 298862                   |
| MO_1388 | 45%                       | <30%                       | Agilent-v4       | 208                         | 196                          | 269                 | 85.85                      | 3.13                         | 66755212                 | 324034                   |
| MO_1390 | 85%                       | 93%                        | Agilent-v4       | 187                         | 171                          | 94                  | 85.74                      | 1.1                          | 64071981                 | 318848                   |
| MO_1391 | 70-80%                    | 82%                        | Agilent-v4       | 203                         | 189                          | 111                 | 86.1                       | 1.29                         | 60375495                 | 302988                   |
| MO_1393 | 80-85%                    | 61%                        | Agilent-v4       | 222                         | 169                          | 341                 | 85.06                      | 4.01                         | 70967982                 | 342409                   |
| MO_1394 | 80-85%                    | <30%                       | Agilent-v4       | 224                         | 190                          | 106                 | 85.44                      | 1.24                         | 62605217                 | 307507                   |
| MO_1395 | 10-25%                    | 40%                        | Agilent-v4       | 217                         | 177                          | 424                 | 85.53                      | 4.96                         | 70254322                 | 354672                   |
| MO_1396 | 75%                       | 30%                        | Agilent-v4       | 182                         | 161                          | 443                 | 85.05                      | 5.21                         | 66900422                 | 141566                   |
| MO_1397 | 12-20%                    | 35%                        | Agilent-v4       | 238                         | 180                          | 1147                | 86.11                      | 13.32                        | 55683672                 | 317700                   |
| MO_1399 | 40%                       | 60%                        | Agilent-v4       | 213                         | 176                          | 494                 | 85.38                      | 5.79                         | 64188965                 | 180824                   |
| MO_1400 | 70-80%                    | 88%                        | Agilent-v4       | 270                         | 122                          | 397                 | 85.5                       | 4.64                         | 72427064                 | 365651                   |
| MO_1402 | 70%                       | 32%                        | Agilent-v4       | 138                         | 144                          | 109                 | 79.69                      | 1.37                         | 63077006                 | 331598                   |
| MO_1403 | 60-70%                    | 61%                        | Agilent-v4       | 242                         | 148                          | 90                  | 85.93                      | 1.05                         | 58594643                 | 300703                   |
| MO_1404 | 75-85%                    | 79%                        | Agilent-v4       | 242                         | 162                          | 112                 | 85.83                      | 1.3                          | 62332072                 | 297032                   |
| MO_1407 | 30-75%                    | 40%                        | Agilent-v4       | 223                         | 160                          | 387                 | 85.2                       | 4.54                         | 72207398                 | 317885                   |
| MO_1408 | 17-25%                    | 84%                        | Agilent-v4       | 207                         | 139                          | 138                 | 83.69                      | 1.65                         | 73044047                 | 348534                   |
| MO_1410 | 40-60%                    | 45%                        | Agilent-v4       | 242                         | 145                          | 212                 | 85.84                      | 2.47                         | 54679480                 | 297223                   |
| MO_1411 | 60%                       | 30%                        | Agilent-v4       | 183                         | 142                          | 302                 | 85.36                      | 3.54                         | 64416293                 | 339159                   |
| MO_1412 | 30-60%                    | 30%                        | Agilent-v4       | 198                         | 151                          | 1740                | 84.63                      | 20.56                        | 67408200                 | 313310                   |
| MO_1415 | 30%                       | 30%                        | Agilent-v4       | 227                         | 153                          | 133                 | 84.83                      | 1.57                         | 65787078                 | 340536                   |
| MO_1416 | 40-80%                    | 93%                        | Agilent-v4       | 245                         | 145                          | 401                 | 83.3                       | 4.81                         | 67628356                 | 347099                   |
| MO_1418 | 23-55%                    | 38%                        | Agilent-v4       | 155                         | 121                          | 190                 | 82.97                      | 2.29                         | 76425785                 | 353069                   |
| MO_1419 | 55-70%                    | 48%                        | Agilent-v4       | 197                         | 159                          | 1554                | 85.53                      | 18.17                        | 66969227                 | 313876                   |
| MO_1420 | 40%                       | 78%                        | Agilent-v4       | 220                         | 161                          | 204                 | 85.23                      | 2.39                         | 65496962                 | 321797                   |
| MO_1421 | 4%                        | 30%                        | Agilent-v4       | 228                         | 154                          | 189                 | 84.76                      | 2.23                         | 77573705                 | 341507                   |
| MO_1423 | 35-75%                    | 62%                        | Agilent-v4       | 222                         | 149                          | 135                 | 85.4                       | 1.58                         | 69597963                 | 324323                   |
| MO_1424 | 80-85%                    | 89%                        | Agilent-v4       | 202                         | 150                          | 131                 | 85.37                      | 1.53                         | 65411872                 | 310056                   |
| MO_1425 | 85%                       | 87%                        | Agilent-v4       | 204                         | 139                          | 677                 | 84.43                      | 8.02                         | 65970793                 | 328241                   |
| MO_1426 | 50%                       | 76%                        | Agilent-v4       | 216                         | 146                          | 308                 | 85.34                      | 3.61                         | 79400024                 | 381779                   |
| MO_1427 | 55-65%                    | 79%                        | Agilent-v4       | 201                         | 127                          | 160                 | 84.49                      | 1.89                         | 60513434                 | 327249                   |
| MO_1428 | 33-45%                    | 58%                        | Agilent-v4       | 207                         | 140                          | 203                 | 84.03                      | 2.42                         | 65723343                 | 342503                   |

Supplementary Table 2 cont. Sample Sequencing Statistics

| Case    | Tumor Content (Pathology) | Tumor Content (Sequencing) | Capture Platform | Mean Coverage (Tumor Exome) | Mean Coverage (Normal Exome) | Number of Mutations | Effective Target Size (Mb) | Mutation Rate (Mutations/Mb) | Transcriptome # of Reads | Splice Junctions Covered |
|---------|---------------------------|----------------------------|------------------|-----------------------------|------------------------------|---------------------|----------------------------|------------------------------|--------------------------|--------------------------|
| MO_1433 | 50-65%                    | 39%                        | Agilent-v4       | 157                         | 113                          | 1210                | 82.75                      | 14.62                        | 71152623                 | 340040                   |
| MO_1434 | 80-85%                    | 63%                        | Agilent-v4       | 358                         | 254                          | 218                 | 86.35                      | 2.52                         | 71008757                 | 342023                   |
| MO_1435 | 80%                       | 69%                        | Agilent-v4       | 163                         | 97                           | 396                 | 82.22                      | 4.82                         | 63100713                 | 312845                   |
| MO_1437 | 50-85%                    | 59%                        | Agilent-v4       | 173                         | 127                          | 245                 | 84.83                      | 2.89                         | 70372807                 | 348240                   |
| MO_1438 | 80%                       | 48%                        | Agilent-v4       | 213                         | 129                          | 61                  | 85.79                      | 0.71                         | 76520135                 | 319396                   |
| MO_1439 | 35-55%                    | 76%                        | Agilent-v4       | 199                         | 152                          | 197                 | 83.72                      | 2.35                         | 65027491                 | 338020                   |
| MO_1442 | 55-85%                    | 86%                        | Agilent-v4       | 198                         | 138                          | 596                 | 84.84                      | 7.02                         | 62112746                 | 312392                   |
| MO_1443 | 0%                        | 39%                        | Agilent-v4       | 180                         | 143                          | 172                 | 85.21                      | 2.02                         | 55788253                 | 287191                   |
| MO_1444 | 35-55%                    | 76%                        | Agilent-v4       | 189                         | 125                          | 4046                | 83.23                      | 48.61                        | 67099453                 | 338701                   |
| MO_1446 | 63%                       | 80%                        | Agilent-v4       | 187                         | 158                          | 268                 | 84.94                      | 3.16                         | 71315253                 | 328734                   |
| MO_1447 | 70%                       | 84%                        | Agilent-v4       | 193                         | 143                          | 330                 | 84.55                      | 3.9                          | 64752468                 | 310530                   |
| MO_1448 | 65-70%                    | 63%                        | Agilent-v4       | 192                         | 143                          | 187                 | 85.26                      | 2.19                         | 69253425                 | 340159                   |
| MO_1449 | 65%                       | <30%                       | Agilent-v4       | 199                         | 150                          | 95                  | 85.1                       | 1.12                         | 67747945                 | 332143                   |
| MO_1452 | 25-45%                    | 32%                        | Agilent-v4       | 223                         | 133                          | 265                 | 85.08                      | 3.11                         | 66520789                 | 341881                   |
| MO_1453 | 40-45%                    | 58%                        | Agilent-v4       | 192                         | 115                          | 453                 | 84.78                      | 5.34                         | 61914545                 | 315969                   |
| MO_1454 | 55-70%                    | 72%                        | Agilent-v4       | 188                         | 118                          | 131                 | 84.98                      | 1.54                         | 69698907                 | 304958                   |
| MO_1455 | 10%                       | 62%                        | Agilent-v4       | 201                         | 125                          | 1004                | 84.76                      | 11.85                        | 65599632                 | 295405                   |
| MO_1458 | 70-80%                    | 60%                        | Agilent-v4       | 186                         | 137                          | 200                 | 84.83                      | 2.36                         | 57990396                 | 311045                   |
| MO_1459 | 40-65%                    | 30%                        | Agilent-v4       | 216                         | 144                          | 622                 | 85.71                      | 7.26                         | 56676996                 | 298033                   |
| MO_1460 | 80-85%                    | 83%                        | Agilent-v4       | 238                         | 133                          | 144                 | 85.87                      | 1.68                         | 66411800                 | 345506                   |
| MO_1462 | 70%                       | <30%                       | Agilent-v4       | 195                         | 127                          | 44                  | 85.21                      | 0.52                         | 65450001                 | 327546                   |
| MO_1464 | NA                        | 41%                        | Agilent-v4       | 196                         | 160                          | 197                 | 85.21                      | 2.31                         | 63393025                 | 334481                   |
| MO_1465 | 65%                       | 51%                        | Agilent-v4       | 151                         | 121                          | 135                 | 84.32                      | 1.6                          | 66214074                 | 243315                   |
| MO_1466 | 70-85%                    | 82%                        | OncoSeq-v2       | 559                         | 405                          | 8                   | 8.37                       | 0.96                         | 64091861                 | 333060                   |
| MO_1469 | 45%                       | 76%                        | Agilent-v4       | 222                         | 126                          | 165                 | 85.57                      | 1.93                         | 61377194                 | 342681                   |
| MO_1472 | 45-60%                    | 62%                        | Agilent-v4       | 221                         | 122                          | 201                 | 85.56                      | 2.35                         | 64440420                 | 326675                   |
| MO_1473 | 0%                        | 41%                        | Agilent-v4       | 180                         | 122                          | 304                 | 84.35                      | 3.6                          | 72957053                 | 312491                   |
| MO_1474 | 65-80%                    | 31%                        | Agilent-v4       | 169                         | 135                          | 140                 | 84.47                      | 1.66                         | 66480059                 | 310780                   |
| MO_1475 | 15-65%                    | <30%                       | Agilent-v4       | 179                         | 121                          | 51                  | 84.71                      | 0.6                          | 62431161                 | 317230                   |
| MO_1476 | 75-85%                    | 85%                        | Agilent-v4       | 184                         | 148                          | 588                 | 84.95                      | 6.92                         | 66237248                 | 324557                   |
| MO_1477 | 40-70%                    | 84%                        | Agilent-v4       | 187                         | 159                          | 369                 | 85.12                      | 4.34                         | 63699693                 | 332050                   |
| MO_1478 | 5-25%                     | 36%                        | Agilent-v4       | 214                         | 134                          | 136                 | 85.77                      | 1.59                         | 58376259                 | 291847                   |
| MO_1479 | 70%                       | 94%                        | Agilent-v4       | 217                         | 129                          | 219                 | 84.86                      | 2.58                         | 62223560                 | 317362                   |
| MO_1480 | 50-55%                    | 51%                        | Agilent-v4       | 187                         | 150                          | 437                 | 85.02                      | 5.14                         | 64617171                 | 298838                   |
| MO_1481 | 20-60%                    | 54%                        | Agilent-v4       | 188                         | 161                          | 7147                | 84.68                      | 84.4                         | 61522122                 | 301635                   |
| MO_1482 | 75-90%                    | 85%                        | Agilent-v4       | 201                         | 153                          | 106                 | 84.54                      | 1.25                         | 71620306                 | 345330                   |
| MO_1483 | 80-85%                    | 58%                        | Agilent-v4       | 196                         | 137                          | 181                 | 85.17                      | 2.13                         | 61882273                 | 297915                   |
| MO_1484 | 25%                       | 52%                        | Agilent-v4       | 191                         | 132                          | 81                  | 85.18                      | 0.95                         | 68545103                 | 343379                   |
| MO_1485 | 45-65%                    | 66%                        | Agilent-v4       | 187                         | 135                          | 139                 | 85.21                      | 1.63                         | 64956785                 | 299665                   |
| MO_1486 | 60-65%                    | 40%                        | Agilent-v4       | 218                         | 140                          | 245                 | 84.64                      | 2.89                         | 68431874                 | 310967                   |
| MO_1487 | 25-30%                    | 30%                        | Agilent-v4       | 202                         | 135                          | 74                  | 85.59                      | 0.86                         | 61101353                 | 316678                   |

Supplementary Table 2 cont. Sample Sequencing Statistics

| Case    | Tumor Content (Pathology) | Tumor Content (Sequencing) | Capture Platform | Mean Coverage (Tumor Exome) | Mean Coverage (Normal Exome) | Number of Mutations | Effective Target Size (Mb) | Mutation Rate (Mutations/Mb) | Transcriptome # of Reads | Splice Junctions Covered |
|---------|---------------------------|----------------------------|------------------|-----------------------------|------------------------------|---------------------|----------------------------|------------------------------|--------------------------|--------------------------|
| MO_1488 | 50-65%                    | 70%                        | Agilent-v4       | 203                         | 132                          | 288                 | 85.11                      | 3.38                         | 67164265                 | 321227                   |
| MO_1489 | 40-60%                    | 68%                        | Agilent-v4       | 197                         | 141                          | 1088                | 84.61                      | 12.86                        | 67047919                 | 370825                   |
| MO_1490 | 0%                        | 61%                        | Agilent-v4       | 184                         | 141                          | 437                 | 85.3                       | 5.12                         | 65491955                 | 303543                   |
| MO_1491 | 40-85%                    | 46%                        | Agilent-v4       | 195                         | 121                          | 178                 | 85.37                      | 2.08                         | 69526975                 | 295697                   |
| MO_1492 | 25-80%                    | 53%                        | Agilent-v4       | 167                         | 134                          | 161                 | 84.25                      | 1.91                         | 65145521                 | 323914                   |
| MO_1493 | 0-10%                     | 30%                        | Agilent-v4       | 181                         | 141                          | 286                 | 85.15                      | 3.36                         | 61965773                 | 318077                   |
| MO_1494 | 15-55%                    | 30%                        | Agilent-v4       | 189                         | 152                          | 197                 | 85.48                      | 2.3                          | 61945565                 | 305730                   |
| MO_1495 | 60-70%                    | 62%                        | Agilent-v4       | 209                         | 143                          | 261                 | 85.16                      | 3.06                         | 65033093                 | 300431                   |
| MO_1496 | 55-60%                    | 91%                        | Agilent-v4       | 226                         | 136                          | 123                 | 85.1                       | 1.45                         | 74132721                 | 313037                   |
| MO_1499 | NA                        | 54%                        | Agilent-v4       | 197                         | 166                          | 152                 | 84.83                      | 1.79                         | 74134362                 | 353016                   |
| MO_1500 | 35-50%                    | 45%                        | Agilent-v4       | 209                         | 166                          | 503                 | 84.54                      | 5.95                         | 71778231                 | 372942                   |
| MO_1502 | 70-80%                    | 78%                        | Agilent-v4       | 208                         | 149                          | 86                  | 85.43                      | 1.01                         | 75795131                 | 342727                   |
| MO_1503 | 25%                       | 44%                        | Agilent-v4       | 229                         | 135                          | 297                 | 85.62                      | 3.47                         | 75688195                 | 354084                   |
| MO_1506 | 70-75%                    | 87%                        | Agilent-v4       | 206                         | 146                          | 888                 | 84.72                      | 10.48                        | 100902960                | 377993                   |
| MO_1507 | 55-65%                    | 87%                        | Agilent-v4       | 182                         | 128                          | 514                 | 84.04                      | 6.12                         | 74752454                 | 344906                   |
| MO_1509 | 75%                       | 74%                        | Agilent-v4       | 210                         | 145                          | 471                 | 85.08                      | 5.54                         | 92814871                 | 321019                   |
| MO_1510 | 50-60%                    | 71%                        | Agilent-v4       | 191                         | 117                          | 189                 | 84.21                      | 2.24                         | 56928066                 | 321092                   |
| MO_1511 | 60-70%                    | 49%                        | Agilent-v4       | 174                         | 153                          | 149                 | 84.87                      | 1.76                         | 60636368                 | 325450                   |
| MO_1513 | 80%                       | 65%                        | Agilent-v4       | 254                         | 142                          | 127                 | 86.11                      | 1.47                         | 62303019                 | 298175                   |
| MO_1514 | 35-75%                    | 59%                        | Agilent-v4       | 210                         | 140                          | 425                 | 85.21                      | 4.99                         | 63606413                 | 312175                   |
| MO_1515 | 60-65%                    | 59%                        | Agilent-v4       | 241                         | 151                          | 628                 | 86.07                      | 7.3                          | 64966212                 | 317505                   |
| MO_1516 | 50-65%                    | 58%                        | Agilent-v4       | 214                         | 158                          | 225                 | 85.52                      | 2.63                         | 56096075                 | 290113                   |
| MO_1517 | 50-75%                    | 59%                        | Agilent-v4       | 182                         | 132                          | 312                 | 83.35                      | 3.74                         | 63185071                 | 330503                   |
| MO_1518 | 30-65%                    | 85%                        | Agilent-v4       | 212                         | 142                          | 122                 | 85.33                      | 1.43                         | 70829594                 | 343411                   |
| MO_1520 | 15-50%                    | 35%                        | Agilent-v4       | 227                         | 141                          | 586                 | 85.32                      | 6.87                         | 65478214                 | 363050                   |
| MO_1521 | 60%                       | <30%                       | Agilent-v4       | 216                         | 134                          | 35                  | 84.75                      | 0.41                         | 65167429                 | 283875                   |
| MO_1522 | 35-40%                    | <30%                       | Agilent-v4       | 210                         | 148                          | 219                 | 85.26                      | 2.57                         | 69943817                 | 343640                   |
| MO_1524 | 80%                       | 45%                        | Agilent-v4       | 197                         | 143                          | 492                 | 85.09                      | 5.78                         | 73547481                 | 337962                   |
| MO_1525 | 4-20%                     | 30%                        | Agilent-v4       | 214                         | 154                          | 166                 | 85.72                      | 1.94                         | 59685375                 | 337000                   |
| MO_1527 | 0-4%                      | 41%                        | Agilent-v4       | 219                         | 156                          | 575                 | 85.5                       | 6.73                         | 67747306                 | 317700                   |
| MO_1528 | 65-80%                    | 68%                        | Agilent-v4       | 216                         | 131                          | 281                 | 85.17                      | 3.3                          | 70273082                 | 361002                   |
| MO_1529 | 40-45%                    | 57%                        | Agilent-v4       | 193                         | 136                          | 183                 | 85.2                       | 2.15                         | 71727060                 | 391471                   |
| MO_1530 | 45-85%                    | 32%                        | Agilent-v4       | 192                         | 138                          | 427                 | 85.01                      | 5.02                         | 71718647                 | 355529                   |
| MO_1532 | 80-85%                    | 72%                        | Agilent-v4       | 188                         | 152                          | 115                 | 85.31                      | 1.35                         | 51480339                 | 277815                   |
| MO_1533 | 80-85%                    | 58%                        | Agilent-v4       | 213                         | 138                          | 2383                | 85.65                      | 27.82                        | 44357701                 | 257136                   |
| MO_1534 | 65%                       | 51%                        | Agilent-v4       | 186                         | 126                          | 442                 | 84.02                      | 5.26                         | 51355668                 | 293090                   |
| MO_1536 | 70-75%                    | 69%                        | OncoSeq-v2       | 447                         | 331                          | 17                  | 8.36                       | 2.03                         | 54258769                 | 293700                   |
| MO_1537 | 4-30%                     | 30%                        | Agilent-v4       | 185                         | 119                          | 121                 | 83.65                      | 1.45                         | 56713064                 | 319170                   |
| MO_1540 | 5%                        | 40%                        | Agilent-v4       | 203                         | 163                          | 333                 | 84.13                      | 3.96                         | 59973189                 | 290231                   |
| MO_1541 | 75-80%                    | 84%                        | Agilent-v4       | 191                         | 171                          | 311                 | 84.47                      | 3.68                         | 58892407                 | 286763                   |
| MO_1542 | 25-55%                    | 33%                        | OncoSeq-v2       | 585                         | 363                          | 83                  | 8.41                       | 9.87                         | 58517314                 | 288961                   |



Supplementary Table 2 cont. Sample Sequencing Statistics

| Case    | Tumor Content (Pathology) | Tumor Content (Sequencing) | Capture Platform | Mean Coverage (Tumor Exome) | Mean Coverage (Normal Exome) | Number of Mutations | Effective Target Size (Mb) | Mutation Rate (Mutations/Mb) | Transcriptome # of Reads | Splice Junctions Covered |
|---------|---------------------------|----------------------------|------------------|-----------------------------|------------------------------|---------------------|----------------------------|------------------------------|--------------------------|--------------------------|
| MO_1543 | 20-35%                    | 36%                        | Agilent-v4       | 215                         | 182                          | 174                 | 85.52                      | 2.03                         | 50750127                 | 326191                   |
| MO_1547 | 35-65%                    | 48%                        | OncoSeq-v2       | 501                         | 356                          | 198                 | 8.38                       | 23.62                        | 51495743                 | 300688                   |
| MO_1550 | 35-40%                    | 41%                        | OncoSeq-v2       | 550                         | 395                          | 30                  | 8.37                       | 3.58                         | 60329845                 | 275297                   |
| MO_1551 | 70-75%                    | 75%                        | Agilent-v4       | 215                         | 114                          | 187                 | 85.95                      | 2.18                         | 53929741                 | 289505                   |
| MO_1552 | 60-75%                    | 61%                        | OncoSeq-v2       | 497                         | 340                          | 46                  | 8.34                       | 5.52                         | 63172992                 | 294289                   |
| MO_1553 | 70-75%                    | 87%                        | Agilent-v4       | 216                         | 135                          | 159                 | 85.98                      | 1.85                         | 54177123                 | 283167                   |
| MO_1555 | 75-80%                    | 85%                        | OncoSeq-v2       | 521                         | 412                          | 37                  | 8.33                       | 4.44                         | 53160473                 | 286006                   |
| MO_1556 | 70-80%                    | 90%                        | Agilent-v4       | 223                         | 128                          | 223                 | 85.25                      | 2.62                         | 51219164                 | 274740                   |
| MO_1557 | 30-70%                    | 45%                        | Agilent-v4       | 151                         | 84                           | 219                 | 82.64                      | 2.65                         | 32534220                 | 264032                   |
| MO_1558 | 30-60%                    | 30%                        | Agilent-v4       | 228                         | 131                          | 667                 | 85.96                      | 7.76                         | 41317055                 | 278724                   |
| MO_1562 | 32-50%                    | 62%                        | Agilent-v4       | 182                         | 100                          | 207                 | 84                         | 2.46                         | 72600531                 | 326447                   |
| MO_1563 | 40-60%                    | 39%                        | Agilent-v4       | 191                         | 113                          | 187                 | 85.07                      | 2.2                          | 86207945                 | 344492                   |
| ES_5001 | 80%                       | 93%                        | Agilent-v4       | 70                          | 110                          | 431                 | 66.04                      | 6.53                         | 108678555                | 392265                   |
| ES_5004 | 7%                        | 47%                        | Agilent-v4       | 211                         | 105                          | 136                 | 78.22                      | 1.74                         | 77155093                 | 332154                   |
| ES_5005 | 70%                       | 41%                        | Agilent-v4       | 156                         | 124                          | 115                 | 70.75                      | 1.63                         | 60849175                 | 319315                   |
| TP_2001 | 75%                       | 38%                        | Agilent-v4       | 185                         | 116                          | 101                 | 77.09                      | 1.31                         | 71564753                 | 308117                   |
| TP_2002 | NA                        | 61%                        | Agilent-v4       | 168                         | 118                          | 488                 | 75.07                      | 6.5                          | 62671388                 | 332746                   |
| TP_2004 | 25%                       | 40%                        | Agilent-v4       | 188                         | 134                          | 101                 | 74.24                      | 1.36                         | 73051280                 | 339314                   |
| TP_2008 | 50%                       | 45%                        | Agilent-v4       | 170                         | 127                          | 109                 | 73.26                      | 1.49                         | 85697987                 | 328946                   |
| TP_2009 | NA                        | 46%                        | Agilent-v4       | 175                         | 115                          | 239                 | 80.64                      | 2.96                         | 71645321                 | 334972                   |
| TP_2010 | 85%                       | 72%                        | Agilent-v4       | 163                         | 106                          | 142                 | 75.74                      | 1.87                         | 65449150                 | 301678                   |
| TP_2011 | 25%                       | 55%                        | Agilent-v4       | 157                         | 116                          | 1061                | 75.31                      | 14.09                        | 69183622                 | 320615                   |
| TP_2013 | 22%                       | <30%                       | Agilent-v4       | 166                         | 143                          | 105                 | 81.62                      | 1.29                         | 118458877                | 354986                   |
| TP_2014 | 35%                       | 30%                        | Agilent-v4       | 165                         | 132                          | 161                 | 78.91                      | 2.04                         | 72265360                 | 312818                   |
| TP_2015 | 85%                       | 55%                        | Agilent-v4       | 129                         | 139                          | 177                 | 77.37                      | 2.29                         | 69117913                 | 106788                   |
| TP_2016 | 60%                       | 30%                        | Agilent-v4       | 167                         | 125                          | 301                 | 80.7                       | 3.73                         | 69481306                 | 309791                   |
| TP_2017 | 65%                       | 36%                        | Agilent-v4       | 166                         | 118                          | 729                 | 81.53                      | 8.94                         | 81078831                 | 330320                   |
| TP_2018 | 90%                       | 63%                        | Agilent-v4       | 212                         | 122                          | 259                 | 79.15                      | 3.27                         | 71796490                 | 313959                   |
| TP_2019 | 95%                       | 95%                        | Agilent-v4       | 169                         | 119                          | 762                 | 80.53                      | 9.46                         | 93852337                 | 334927                   |
| TP_2020 | 0-10%                     | 42%                        | Agilent-v4       | 157                         | 100                          | 120                 | 71.88                      | 1.67                         | 63978100                 | 298832                   |
| TP_2021 | 40%                       | 46%                        | Agilent-v4       | 171                         | 102                          | 291                 | 75.41                      | 3.86                         | 70497669                 | 228011                   |
| TP_2023 | 70%                       | 80%                        | Agilent-v4       | 178                         | 131                          | 41                  | 76.05                      | 0.54                         | 65750007                 | 228607                   |
| TP_2024 | 55%                       | 87%                        | Agilent-v4       | 192                         | 121                          | 215                 | 77.83                      | 2.76                         | 64981716                 | 185909                   |
| TP_2025 | 80%                       | 57%                        | Agilent-v4       | 193                         | 119                          | 198                 | 75.74                      | 2.61                         | 69576928                 | 192718                   |
| TP_2027 | 90%                       | 64%                        | Agilent-v4       | 214                         | 117                          | 978                 | 79.55                      | 12.29                        | 63401949                 | 271509                   |
| TP_2028 | 80%                       | 93%                        | Agilent-v4       | 180                         | 115                          | 119                 | 77.91                      | 1.53                         | 59669738                 | 301061                   |
| TP_2029 | 0-40%                     | 48%                        | Agilent-v4       | 170                         | 121                          | 286                 | 78.16                      | 3.66                         | 64836773                 | 289615                   |
| TP_2032 | 90%                       | 57%                        | Agilent-v4       | 186                         | 137                          | 132                 | 76.38                      | 1.73                         | 64054499                 | 275506                   |
| TP_2034 | 7%                        | 51%                        | Agilent-v4       | 146                         | 135                          | 119                 | 72.17                      | 1.65                         | 52240518                 | 280936                   |
| TP_2037 | 50%                       | 30%                        | Agilent-v4       | 77                          | 134                          | 112                 | 72.19                      | 1.55                         | 47164474                 | 329653                   |
| TP_2038 | 35%                       | 56%                        | Agilent-v4       | 187                         | 127                          | 134                 | 78.79                      | 1.7                          | 45770815                 | 305625                   |

Supplementary Table 2 cont. Sample Sequencing Statistics

| Case    | Tumor Content (Pathology) | Tumor Content (Sequencing) | Capture Platform | Mean Coverage (Tumor Exome) | Mean Coverage (Normal Exome) | Number of Mutations | Effective Target Size (Mb) | Mutation Rate (Mutations/Mb) | Transcriptome # of Reads | Splice Junctions Covered |
|---------|---------------------------|----------------------------|------------------|-----------------------------|------------------------------|---------------------|----------------------------|------------------------------|--------------------------|--------------------------|
| TP_2042 | 50%                       | 74%                        | Agilent-v4       | 207                         | 100                          | 177                 | 83.06                      | 2.13                         | 49432316                 | 312414                   |
| TP_2043 | 80%                       | <30%                       | Agilent-v4       | 173                         | 108                          | 91                  | 81.31                      | 1.12                         | 55312866                 | 308910                   |
| TP_2047 | 55%                       | 30%                        | Agilent-v4       | 201                         | 107                          | 107                 | 79.5                       | 1.35                         | 66535750                 | 341233                   |
| TP_2050 | 25-45%                    | 54%                        | Agilent-v4       | 218                         | 103                          | 629                 | 85.05                      | 7.4                          | 68070928                 | 322798                   |
| TP_2052 | 45%                       | <30%                       | Agilent-v4       | 161                         | 100                          | 512                 | 79.71                      | 6.42                         | 62283997                 | 321316                   |
| TP_2054 | 20-27%                    | 46%                        | Agilent-v4       | 172                         | 108                          | 296                 | 83.67                      | 3.54                         | 72532198                 | 331168                   |
| TP_2055 | 70-80%                    | <30%                       | Agilent-v4       | 174                         | 118                          | 52                  | 84.19                      | 0.62                         | 64161020                 | 295380                   |
| TP_2056 | 85%                       | 87%                        | Agilent-v4       | 133                         | 108                          | 159                 | 80.75                      | 1.97                         | 61444179                 | 344106                   |
| TP_2058 | 55%                       | 58%                        | Agilent-v4       | 189                         | 133                          | 438                 | 81.51                      | 5.37                         | 54021575                 | 344794                   |
| TP_2059 | 50%                       | 30%                        | Agilent-v4       | 158                         | 131                          | 284                 | 83.4                       | 3.41                         | 62090254                 | 293092                   |
| TP_2060 | 7-20%                     | 30%                        | Agilent-v4       | 156                         | 118                          | 252                 | 82.71                      | 3.05                         | 58546355                 | 306748                   |
| TP_2061 | 40%                       | 77%                        | Agilent-v4       | 167                         | 122                          | 170                 | 82.48                      | 2.06                         | 72459487                 | 331496                   |
| TP_2064 | 75%                       | 39%                        | Agilent-v4       | 159                         | 128                          | 148                 | 84.05                      | 1.76                         | 67563765                 | 263761                   |
| TP_2065 | 65%                       | 57%                        | Agilent-v4       | 231                         | 192                          | 140                 | 85.79                      | 1.63                         | 65177350                 | 346965                   |
| TP_2067 | 80%                       | 79%                        | Agilent-v4       | 190                         | 141                          | 373                 | 83.57                      | 4.46                         | 60766330                 | 351241                   |
| TP_2069 | 45-55%                    | 54%                        | Agilent-v4       | 219                         | 131                          | 348                 | 85.16                      | 4.09                         | 59059586                 | 326729                   |
| TP_2070 | 75%                       | 84%                        | Agilent-v4       | 208                         | 129                          | 133                 | 84.6                       | 1.57                         | 58874184                 | 309778                   |
| TP_2071 | 4-13%                     | 77%                        | Agilent-v4       | 218                         | 158                          | 123                 | 85.67                      | 1.44                         | 70261727                 | 330171                   |
| TP_2072 | 85%                       | 81%                        | Agilent-v4       | 171                         | 156                          | 120                 | 83.96                      | 1.43                         | 65395646                 | 425756                   |
| TP_2073 | 25-35%                    | 30%                        | Agilent-v4       | 252                         | 140                          | 156                 | 85.88                      | 1.82                         | 62180109                 | 308232                   |
| TP_2074 | 35%                       | <30%                       | Agilent-v4       | 171                         | 136                          | 99                  | 84.76                      | 1.17                         | 70943366                 | 410170                   |
| TP_2075 | 75%                       | 95%                        | Agilent-v4       | 183                         | 135                          | 97                  | 84.89                      | 1.14                         | 61983147                 | 321621                   |
| TP_2077 | 75%                       | 85%                        | Agilent-v4       | 183                         | 134                          | 147                 | 84.78                      | 1.73                         | 64235821                 | 301240                   |
| TP_2078 | 70-85%                    | 84%                        | Agilent-v4       | 177                         | 115                          | 229                 | 83.65                      | 2.74                         | 72504949                 | 300877                   |
| TP_2079 | 25-30%                    | 96%                        | Agilent-v4       | 171                         | 136                          | 154                 | 83.94                      | 1.83                         | 67601786                 | 274037                   |
| TP_2080 | 40%                       | 30%                        | Agilent-v4       | 213                         | 124                          | 100                 | 85.94                      | 1.16                         | 65450505                 | 355743                   |
| TP_2081 | 67%                       | 76%                        | Agilent-v4       | 183                         | 124                          | 204                 | 84.66                      | 2.41                         | 74284933                 | 329195                   |
| TP_2083 | 40-70%                    | 75%                        | Agilent-v4       | 175                         | 132                          | 310                 | 84.47                      | 3.67                         | 81625345                 | 342018                   |
| TP_2086 | 15-30%                    | 43%                        | Agilent-v4       | 204                         | 144                          | 167                 | 85.32                      | 1.96                         | 73266420                 | 348723                   |
| TP_2087 | 45%                       | 39%                        | Agilent-v4       | 187                         | 117                          | 317                 | 83.59                      | 3.79                         | 59468954                 | 49868                    |
| TP_2090 | 0-5%                      | <30%                       | Agilent-v4       | 195                         | 140                          | 37                  | 85.27                      | 0.43                         | 66786595                 | 286163                   |
| TP_2091 | 40%                       | 71%                        | Agilent-v4       | 207                         | 127                          | 158                 | 85.75                      | 1.84                         | 69232215                 | 344279                   |
| TP_2093 | 70-85%                    | 90%                        | Agilent-v4       | 204                         | 131                          | 130                 | 84.75                      | 1.53                         | 65978329                 | 304752                   |
| TP_2096 | 65-90%                    | 89%                        | Agilent-v4       | 196                         | 138                          | 220                 | 84.96                      | 2.59                         | 68027818                 | 304573                   |
| TP_2098 | 55-65%                    | 65%                        | Agilent-v4       | 213                         | 129                          | 173                 | 84.58                      | 2.05                         | 70084934                 | 345634                   |
| TP_2100 | 40%                       | 37%                        | Agilent-v4       | 155                         | 92                           | 598                 | 84.16                      | 7.11                         | 73827612                 | 345942                   |
| TP_2101 | 50-60%                    | 52%                        | Agilent-v4       | 190                         | 130                          | 762                 | 85.21                      | 8.94                         | 69851252                 | 318827                   |
| TP_2102 | 75-90%                    | 60%                        | Agilent-v4       | 205                         | 142                          | 2532                | 85.33                      | 29.67                        | 58118079                 | 308309                   |
| TP_2106 | 32%                       | 30%                        | Agilent-v4       | 207                         | 152                          | 399                 | 85.14                      | 4.69                         | 70413919                 | 319722                   |
| TP_2109 | 85%                       | 69%                        | Agilent-v4       | 178                         | 116                          | 131                 | 84.59                      | 1.55                         | 83858431                 | 361238                   |
| TP_2118 | 80-90%                    | 57%                        | Agilent-v4       | 210                         | 152                          | 461                 | 85.18                      | 5.41                         | 65219752                 | 296778                   |

**Supplementary Table 2 cont. Sample Sequencing Statistics**

| <b>Case</b> | <b>Tumor Content<br/>(Pathology)</b> | <b>Tumor Content<br/>(Sequencing)</b> | <b>Capture<br/>Platform</b> | <b>Mean Coverage<br/>(Tumor Exome)</b> | <b>Mean Coverage<br/>(Normal Exome)</b> | <b>Number of<br/>Mutations</b> | <b>Effective Target<br/>Size (Mb)</b> | <b>Mutation Rate<br/>(Mutations/Mb)</b> | <b>Transcriptome<br/># of Reads</b> | <b>Splice Junctions<br/>Covered</b> |
|-------------|--------------------------------------|---------------------------------------|-----------------------------|----------------------------------------|-----------------------------------------|--------------------------------|---------------------------------------|-----------------------------------------|-------------------------------------|-------------------------------------|
| TP_2119     | 85%                                  | 50%                                   | Agilent-v4                  | 202                                    | 149                                     | 180                            | 85.02                                 | 2.12                                    | 73982949                            | 312235                              |
| TP_2120     | 85%                                  | 70%                                   | Agilent-v4                  | 205                                    | 148                                     | 285                            | 85.32                                 | 3.34                                    | 91423874                            | 370941                              |
| TP_2122     | 35-55%                               | 31%                                   | Agilent-v4                  | 212                                    | 152                                     | 1009                           | 85.48                                 | 11.8                                    | 65551318                            | 330912                              |
| TP_2123     | 60%                                  | 52%                                   | Agilent-v4                  | 206                                    | 144                                     | 47                             | 85.24                                 | 0.55                                    | 66038352                            | 346038                              |
| TP_2130     | 60%                                  | 46%                                   | Agilent-v4                  | 178                                    | 112                                     | 332                            | 83.55                                 | 3.97                                    | 60413113                            | 319113                              |
| TP_2131     | 75-90%                               | 43%                                   | Agilent-v4                  | 189                                    | 122                                     | 1492                           | 84.71                                 | 17.61                                   | 55910037                            | 299759                              |
| TP_2141     | 70%                                  | 67%                                   | OncoSeq-v2                  | 515                                    | 357                                     | 19                             | 8.37                                  | 2.27                                    | 58569522                            | 306156                              |
| TP_2156     | 65%                                  | 78%                                   | Agilent-v4                  | 222                                    | 124                                     | 291                            | 85.76                                 | 3.39                                    | 52008436                            | 320799                              |

**Supplementary Table 4. Pathogenic Germline Variants in the MET500 cohort.**

| StudyID | Cancer                                    | Gene          | Variant             | Protein Change      | Normal (Var. Freq) | Tumor (Var. Freq) | dbSNP       | ClinVar Allele ID | ClinVar Significance         |
|---------|-------------------------------------------|---------------|---------------------|---------------------|--------------------|-------------------|-------------|-------------------|------------------------------|
| MO_1210 | Hepatocellular carcinoma                  | <i>APC</i>    | c.4634C>G           | p.S1545*            | 51%                | 50%               | rs863225356 | 214726            | Likely pathogenic            |
| MO_1328 | Penile Squamous Cell Carcinoma            | <i>BRCA1</i>  | c.4065_4068delTCAA  | p.N1355fs           | 52%                | 100%              | rs80357508  | 32713             | Pathogenic                   |
| MO_1107 | Breast Invasive Ductal Carcinoma          | <i>BRCA1</i>  | c.5266dupC          | p.Q1756fs           | 41%                | 46%               | rs397507246 | 32716             | Pathogenic                   |
| MO_1378 | Serous Ovarian Cancer                     | <i>BRCA1</i>  | c.5266dupC          | p.Q1756fs           | 30%                | 49%               | rs397507246 | 32716             | Pathogenic                   |
| MO_1232 | Prostate Adenocarcinoma                   | <i>BRCA1</i>  | c.5266dupC          | p.Q1756fs           | 37%                | 59%               | rs397507246 | 32716             | Pathogenic                   |
| MO_1268 | Mullerian Poorly Differentiated Carcinoma | <i>BRCA1</i>  | c.5449G>T           | p.E1817*            | 47%                | 63%               | rs80356868  | 70250             | Pathogenic                   |
| MO_1175 | Carcinoma of unknown primary              | <i>BRCA2</i>  | c.36dupT            | p.E13fs             | 35%                | 57%               | rs80359393  | 66177             | Pathogenic                   |
| MO_1399 | Breast Invasive Ductal Carcinoma          | <i>BRCA2</i>  | c.2025delA          | p.T675fs            | 35%                | 48%               | rs398122737 | 97243             | Pathogenic                   |
| TP_2141 | Breast Invasive Ductal Carcinoma          | <i>BRCA2</i>  | c.3545_3546delTT    | p.F1182fs           | 37%                | 42%               | rs80359388  | 46402             | Pathogenic                   |
| TP_2118 | Breast Invasive Ductal Carcinoma          | <i>BRCA2</i>  | c.4127_4130delGAAA  | p.G1376fs           | 60%                | 100%              | rs397507323 | 46436             | Pathogenic                   |
| MO_1013 | Prostate Adenocarcinoma                   | <i>BRCA2</i>  | c.4478_4481delAAAG  | p.E1493fs           | 60%                | 100%              | rs80359454  | 66321             | Pathogenic                   |
| MO_1176 | Prostate Adenocarcinoma                   | <i>BRCA2</i>  | c.4472_4475delTGAA  | p.L1491fs           | 68%                | 100%              | rs80359452  | 46462             | Pathogenic                   |
| TP_2054 | Prostate Adenocarcinoma                   | <i>BRCA2</i>  | c.5645C>A           | p.S1882*            | 44%                | 63%               | s80358785   | 46540             | Pathogenic                   |
| MO_1288 | Breast Invasive Ductal Carcinoma          | <i>BRCA2</i>  | c.5722_5723delCT    | p.L1908fs           | 36%                | 44%               | rs80359530  | 24359             | Pathogenic                   |
| MO_1506 | Esophageal Adenocarcinoma                 | <i>BRCA2</i>  | c.8878C>T           | p.Q2960*            | 48%                | 95%               | rs80359140  | 67362             | Pathogenic                   |
| MO_1248 | Serous Ovarian Cancer                     | <i>BRIP1</i>  | c.-31+498_187del    | p.I32fs             | 78%                | 100%              |             |                   | see footnote 1               |
| MO_1283 | Embryonal Rhabdomyosarcoma                | <i>DICER1</i> | c.2233C>T           | p.R745*             | 49%                | 46%               |             |                   | see footnote 2               |
| TP_2002 | Adenocarcinoma, NOS                       | <i>FANCA</i>  | c.1115_1118delTTGG  | p.V372fs            | 51%                | 100%              | rs397507552 | 18479             | Pathogenic                   |
| MO_1048 | Colon Adenocarcinoma                      | <i>MLH1</i>   | c.199G>A            | p.G67R              | 49%                | 54%               | rs63750206  | 95466             | Pathogenic                   |
| MO_1102 | Thymic Squamous Carcinoma                 | <i>MLH1</i>   | c.589-2A>G          | Splice acc. p.Q197  | 50%                | 75%               | rs267607767 | 95765             | Pathogenic                   |
| MO_1079 | Sarcomatoid Carcinoma                     | <i>MSH2</i>   | c.1906G>C           | p.A636P             | 62%                | 72%               | rs63750875  | 16803             | Pathogenic                   |
| MO_1347 | Extrahepatic Cholangiocarcinoma           | <i>MSH2</i>   | c.2494G>T           | p.E832*             | 44%                | 40%               | rs863225396 | 214595            | Likely pathogenic            |
| TP_2029 | Colon Adenocarcinoma                      | <i>MUTYH</i>  | c.1187G>A, c.536A>G | p.G396D, p.Y179C    | 48%, 44%           | 44%, 45%          | rs36053993  | 20333             | Pathogenic                   |
| MO_1411 | Breast Invasive Lobular Carcinoma         | <i>PALB2</i>  | c.3323delA          | p.Y1108fs           | 39%                | 53%               | rs180177135 | 132244            | Pathogenic                   |
| MO_1527 | Breast Invasive Ductal Carcinoma          | <i>PALB2</i>  | c.758dupT           | p.S254fs            | 38%                | 40%               | rs515726126 | 132279            | Pathogenic/Likely pathogenic |
| MO_1124 | Prostate Adenocarcinoma                   | <i>RAD51D</i> | c.264-1G>A          | Splice acc. p.S88   | 50%                | 51%               |             |                   | see footnote 3               |
| MO_1168 | Leiomyosarcoma                            | <i>RB1</i>    | c.1363C>T           | p.R455*             | 82%                | 0%                | rs121913302 | 132347            | Pathogenic/Likely pathogenic |
| MO_1008 | Prostate Adenocarcinoma                   | <i>APC</i>    | c.3920T>A           | p.I1307K            | 49%                | 49%               | rs1801155   | 15861             | Pathogenic, VUS, risk factor |
| ES_5004 | Colon Adenocarcinoma                      | <i>APC</i>    | c.3920T>A           | p.I1307K            | 39%                | 74%               | rs1801155   | 15861             | Pathogenic, VUS, risk factor |
| MO_1138 | High-Grade Serous Ovarian Cancer          | <i>APC</i>    | c.3920T>A           | p.I1307K            | 47%                | 50%               | rs1801155   | 15861             | Pathogenic, VUS, risk factor |
| MO_1157 | Uterine Leiomyosarcoma                    | <i>APC</i>    | c.3920T>A           | p.I1307K            | 49%                | 59%               | rs1801155   | 15861             | Pathogenic, VUS, risk factor |
| MO_1172 | Pancreatic Adenocarcinoma                 | <i>APC</i>    | c.3920T>A           | p.I1307K            | 54%                | 57%               | rs1801155   | 15861             | Pathogenic, VUS, risk factor |
| MO_1221 | Prostate Adenocarcinoma                   | <i>ATM</i>    | c.7630-2A>C         | Splice acc. p.L2544 | 44%                | 91%               | rs587779866 | 132904            | Pathogenic                   |
| MO_1061 | Thymoma                                   | <i>CHEK2</i>  | c.247delC           | p.Q83fs             | 27%                | 26%               | rs587782766 | 152565            | Pathogenic/Likely pathogenic |
| MO_1125 | Poorly Differentiated NSCLC               | <i>CHEK2</i>  | c.283C>T            | p.R95*              | 49%                | 73%               | rs587781269 | 150486            | Pathogenic                   |

**Supplementary Table 4 cont. Pathogenic Germline Variants in the MET500 cohort.**

| StudyID | Cancer                                 | Gene          | Variant                     | Protein Change     | Normal (Var. Freq) | Tumor (Var. Freq) | dbSNP       | ClinVar Allele ID | ClinVar Significance                      |
|---------|----------------------------------------|---------------|-----------------------------|--------------------|--------------------|-------------------|-------------|-------------------|-------------------------------------------|
| MO_1076 | Dermatofibrosarcoma protuberans        | <i>CHEK2</i>  | c.433C>T                    | p.R145W            | 44%                | 44%               | rs137853007 | 20631             | Pathogenic/Likely pathogenic              |
| MO_1400 | Esophageal Squamous Cell Carcinoma     | <i>CHEK2</i>  | c.444+1G>A                  | Splice don. p.R191 | 47%                | 32%               | rs121908698 | 133532            | Pathogenic/Likely pathogenic              |
| MO_1355 | Breast Invasive Ductal Carcinoma       | <i>CHEK2</i>  | c.470T>C                    | p.I157T            | 52%                | 87%               | rs17879961  | 20630             | Pathogenic, Likely Path, VUS, risk factor |
| MO_1361 | Bladder Urothelial Carcinoma           | <i>CHEK2</i>  | c.470T>C                    | p.I157T            | 45%                | 42%               | rs17879961  | 20630             | Pathogenic, Likely Path, VUS, risk factor |
| MO_1423 | Adamantinoma                           | <i>CHEK2</i>  | c.470T>C                    | p.I157T            | 49%                | 71%               | rs17879961  | 20630             | Pathogenic, Likely Path, VUS, risk factor |
| MO_1562 | Breast Invasive Ductal Carcinoma       | <i>CHEK2</i>  | c.470T>C                    | p.I157T            | 47%                | 55%               | rs17879961  | 20630             | Pathogenic, Likely Path, VUS, risk factor |
| TP_2098 | Myoepithelial Carcinoma                | <i>CHEK2</i>  | c.1100delC                  | p.T367fs           | 25%                | 10%               | rs555607708 | 133499            | Pathogenic                                |
| MO_1319 | Gastrointestinal Stromal Tumor         | <i>HOXB13</i> | c.251G>A                    | p.G84E             | 45%                | 48%               | rs138213197 | 133488            | Pathogenic, risk factor                   |
| MO_1347 | Extrahepatic Cholangiocarcinoma        | <i>HOXB13</i> | c.251G>A                    | p.G84E             | 46%                | 44%               | rs138213197 | 133488            | Pathogenic, risk factor                   |
| MO_1434 | Adrenocortical Carcinoma               | <i>HOXB13</i> | c.251G>A                    | p.G84E             | 52%                | 83%               | rs138213197 | 133488            | Pathogenic, risk factor                   |
| MO_1171 | Teratoma with Malignant Transformation | <i>MITF</i>   | c.952G>A                    | p.E318K            | 45%                | 54%               | rs149617956 | 38747             | Pathogenic, VUS                           |
| MO_1183 | Cutaneous Melanoma                     | <i>MITF</i>   | c.952G>A                    | p.E318K            | 45%                | 46%               | rs149617956 | 38747             | Pathogenic , VUS                          |
| MO_1375 | Esophageal Adenocarcinoma              | <i>MITF</i>   | c.952G>A                    | p.E318K            | 48%                | 11%               | rs149617956 | 38747             | Pathogenic, VUS                           |
| TP_2020 | Prostate Adenocarcinoma                | <i>MITF</i>   | c.952G>A                    | p.E318K            | 49%                | 47%               | rs149617956 | 38747             | Pathogenic, VUS                           |
| TP_2021 | Urethral Urothelial Carcinoma          | <i>MITF</i>   | c.952G>A                    | p.E318K            | 42%                | 52%               | rs149617956 | 38747             | Pathogenic, VUS                           |
| MO_1183 | Cutaneous Melanoma                     | <i>MUTYH</i>  | c.536A>G                    | p.Y179C            | 50%                | 45%               | rs34612342  | 20332             | Pathogenic                                |
| MO_1370 | Undifferentiated Pleomorphic Sarcoma   | <i>MUTYH</i>  | c.536A>G                    | p.Y179C            | 47%                | 2%                | rs34612342  | 20332             | Pathogenic                                |
| TP_2109 | Breast Invasive Lobular Carcinoma      | <i>MUTYH</i>  | c.536A>G                    | p.Y179C            | 50%                | 46%               | rs34612342  | 20332             | Pathogenic                                |
| MO_1044 | Adenoid Cystic Carcinoma               | <i>MUTYH</i>  | c.1187G>A                   | p.G396D            | 48%                | 48%               | rs36053993  | 20333             | Pathogenic                                |
| MO_1383 | Adenocarcinoma, NOS                    | <i>MUTYH</i>  | c.1187G>A                   | p.G396D            | 47%                | 64%               | rs36053993  | 20333             | Pathogenic                                |
| MO_1435 | Breast Invasive Lobular Carcinoma      | <i>MUTYH</i>  | c.1187G>A                   | p.G396D            | 44%                | 64%               | rs36053993  | 20333             | Pathogenic                                |
| MO_1447 | Prostate Adenocarcinoma                | <i>MUTYH</i>  | c.1187G>A                   | p.G396D            | 48%                | 60%               | rs36053993  | 20333             | Pathogenic                                |
| MO_1480 | Esophageal Adenocarcinoma              | <i>MUTYH</i>  | c.1187G>A                   | p.G396D            | 48%                | 60%               | rs36053993  | 20333             | Pathogenic                                |
| MO_1333 | Embryonal Carcinoma                    | <i>NBN</i>    | c.1142delC                  | p.P381fs           | 37%                | 34%               | rs587781969 | 151445            | Pathogenic                                |
| MO_1150 | Lung Adenocarcinoma                    | <i>NBN</i>    | c.171+1G>A                  | Splice don. p.L57  | 46%                | 75%               |             |                   | see footnote 4                            |
| MO_1271 | Breast Invasive Ductal Carcinoma       | <i>RAD50</i>  | c.326_329delCAGA            | p.T109fs           | 47%                | 48%               | rs587780155 | 133474            | Pathogenic                                |
| MO_1361 | Bladder Urothelial Carcinoma           | <i>RAD50</i>  | c.2299_2311delGACATAGAAGAAC | p.D767fs           | 46%                | 42%               |             |                   | see footnote 5                            |

1. Striking family history of early onset breast and uterine cancer. BRCA1/2 testing in the family is negative. LOH in the tumor specimen. Similar ClinVar alleles 222555 and 186242 assigned Pathogenic and Likely Pathogenic.
2. Similar truncating alleles in ClinVar 248860, 248888, 248889, and 248858 judged Pathogenic. Multiple reports of germline truncating mutations of DICER1 in embryonal rhabdomyosarcoma. Somatic DICER1 p.E1813G in tumor.
3. Altered splicing evident in transcriptome. Nearby truncating ClinVar alleles 184846, 180808, 242729, 181162 judged Pathogenic. Early onset prostate cancer. Extensive family history of cancer.
4. Altered splicing evident in transcriptome. Nearby truncating ClinVar alleles 182903, 151680, 233710, 182901 judged Pathogenic. LOH in tumor.
5. Nearby truncating ClinVar alleles 233359, 221579, 182596 judged Pathogenic. History of multiple cancers.

**Supplementary Table 5. Germline Mutations in Metastatic Cancer as Compared with the General Population**

| Gene    | Metastatic Cancer Pathogenic Allele Count | Metastatic Cancer Total Allele Count | EXAC* Pathogenic Allele Count | EXAC* Total Allele Count | Metastatic Cancer vs. Exome Aggregation Consortium |          |         |                         |
|---------|-------------------------------------------|--------------------------------------|-------------------------------|--------------------------|----------------------------------------------------|----------|---------|-------------------------|
|         |                                           |                                      |                               |                          | Relative Risk <sup>#</sup>                         | 95% CI   | P Value | Bonferroni <sup>§</sup> |
| APC     | 6                                         | 1000                                 | 23                            | 106186                   | 27.7                                               | 9.2-70.1 | <.0001  | 0.0019                  |
| ATM     | 1                                         | 1000                                 | 149                           | 106203                   | 0.7                                                | 0.02-4.0 | 1       | 1                       |
| BRCA1   | 5                                         | 1000                                 | 98                            | 102751                   | 5.2                                                | 1.7-12.7 | 0.003   | 0.057                   |
| BRCA2   | 9                                         | 1000                                 | 152                           | 106203                   | 6.3                                                | 2.8-12.3 | <.0001  | 0.0019                  |
| BRIP1   | 1                                         | 1000                                 | 100                           | 106194                   | 1.1                                                | 0.03-6.1 | 0.61    | 1                       |
| CHEK2   | 9                                         | 1000                                 | 313                           | 103578                   | 3                                                  | 1.4-5.8  | 0.004   | 0.076                   |
| DICER1  | 1                                         | 1000                                 | 10                            | 106208                   | 10.6                                               | 0.2-74.8 | 0.1     | 1                       |
| FANCA   | 1                                         | 1000                                 | 137                           | 105327                   | 0.8                                                | 0.02-4.4 | 1       | 1                       |
| HOXB13  | 3                                         | 1000                                 | 30                            | 106206                   | 10.6                                               | 2.1-34.2 | 0.004   | 0.076                   |
| MITF    | 5                                         | 1000                                 | 126                           | 106205                   | 4.2                                                | 1.3-10.1 | 0.008   | 0.152                   |
| MLH1    | 2                                         | 1000                                 | 12                            | 106210                   | 17.7                                               | 1.9-79.5 | 0.007   | 0.133                   |
| MSH2    | 2                                         | 1000                                 | 143                           | 102030                   | 1.4                                                | 0.2-5.3  | 0.65    | 1                       |
| MUTYH   | 9                                         | 1000                                 | 725                           | 106205                   | 1.3                                                | 0.6-2.5  | 0.44    | 1                       |
| NBN     | 2                                         | 1000                                 | 31                            | 106166                   | 6.9                                                | 0.8-27   | 0.04    | 0.76                    |
| PALB2   | 2                                         | 1000                                 | 49                            | 106209                   | 4.3                                                | 0.5-16.6 | 0.08    | 1                       |
| RAD50   | 2                                         | 1000                                 | 52                            | 106163                   | 4.1                                                | 0.5-15.6 | 0.09    | 1                       |
| RAD51D  | 1                                         | 1000                                 | 28                            | 106209                   | 3.8                                                | 0.1-23   | 0.24    | 1                       |
| RB1     | 1                                         | 1000                                 | 2                             | 106177                   | 53.1                                               | 0.9-994  | 0.03    | 0.57                    |
| Overall | 62                                        | 1000                                 | 2180                          | 105579                   | 3                                                  | 2.3-3.9  | <.0001  | 0.0019                  |

\* Data are for individuals in the Exome Aggregation Cohort excluding the individuals in TCGA studies.

# Relative Risk as calculated by Fisher's 2-sided binomial test.

§ Bonferroni adjusted P-value

**Supplementary Table 6. Pathogenic Fusions in the Metastatic 500 Cohort**

| CASE    | FUSION            | READS                                                                                                   | 5' ACCESSION | 5' EXON | 3' ACCESSION   | 3' EXON | CANCER TYPE                         |
|---------|-------------------|---------------------------------------------------------------------------------------------------------|--------------|---------|----------------|---------|-------------------------------------|
| ES_5001 | NF1-17q21.1       | 30                                                                                                      | NM_000267.3  | 35      | 17q21.1        | na      | Breast Invasive Ductal Carcinoma    |
|         | Junction sequence | GCTGGGACTTCCAAAGCTGGGAATCCTATTTTTTATATGTTGCACGGAG CCCAGGAAGAGGATCTGCAGCCACAACCAGGCCAGCAGCAGCAAGATGAC    |              |         |                |         |                                     |
| MO_1005 | NAB2-STAT6        | 628                                                                                                     | NM_005967.3  | 6       | NM_003153.4    | 17      | Solitary Fibrous Tumor              |
|         | Junction sequence | CCGCGTGGGCCGCCCTCAGCCCCTGTGTGCCTGCGAAGCCACCTCTCGCAG CTGAACAGATGGGTAAAGATGGCAGGGGTATGTCCCAGCTACCATCAAG   |              |         |                |         |                                     |
| MO_1008 | EIF4A2-ETV5       | 935                                                                                                     | NM_001967.3  | 3       | NM_004454.2    | 6       | Prostate Adenocarcinoma             |
|         | Junction sequence | TGAGAAGCCTTCCGCTATTTCAGCAGAGAGCTATTATTCCTGTATTAAG TGGTGCTTCATGCCCCACCTCCAACCAAGATCAAACGGGAGCTGCACAGC    |              |         |                |         |                                     |
| MO_1013 | KDM6A-20q13.13    | 8                                                                                                       | NM_021140.3  | 2       | 20q13.13       | na      | Prostate Adenocarcinoma             |
|         | Junction sequence | TCGTGAGATTTTCATGAAGATGGCGCCAGGACGAAGGCCCTACTGGGCAAG GTCTTCAAGGAGAGATGCTGATTGGACATCTATGAATAGATGGGTTTCCG  |              |         |                |         |                                     |
| MO_1013 | PTEN-3q21.3       | 21                                                                                                      | NM_000314.6  | 3       | 3q21.3         | na      | Prostate Adenocarcinoma             |
|         | Junction sequence | GTAAGTTTTTTGGATTCAAAGCATAAAAAACCATTACAAGATATACAATCT ATTGTGGTTGTTTTCAAAGTTTTTGTATTATAATTGCCCTACAGGGAACA  |              |         |                |         |                                     |
| MO_1015 | TMPRSS2-ERG       | 209                                                                                                     | NM_005656.3  | 1       | NM_004449.4    | 4       | Prostate Adenocarcinoma             |
|         | Junction sequence | AGGCGGAGGGCGGAGGGCGAGGGGCGGGGAGCGCCGCTGGAGCGCGGCAG GAAGCCTTATCAGTTGTGAGTGAGGACCAGTCGTTGTTGAGTGTGCCTA    |              |         |                |         |                                     |
| MO_1015 | TP53-SMYD4        | 13                                                                                                      | NM_000546.5  | 1       | NM_052928.2    | 6       | Prostate Adenocarcinoma             |
|         | Junction sequence | TCGGGCTGGGAGCGTGTCTTCCACGACGGTGACACGCTTCCCTGGATTGG GACCTAAAGGGAGCATCGTTACCGACAGCAGGCAGGTGCGCCTTGCCACA   |              |         |                |         |                                     |
| MO_1020 | PVT-SLC30A4       | 115                                                                                                     | NR_003367.3  | 1       | NM_013309.5    | 3       | Prostate Adenocarcinoma             |
|         | Junction sequence | ATGTTGGCGGTCCCCTGTGACCTGTGGAGACACGGCCAGATCTGCCCTCCA GTGGATACATTGCAAAATAGCCTAGCAATCATGACAGATGCACTTCATATG |              |         |                |         |                                     |
| MO_1023 | EWSR1-NR4A3       | 831                                                                                                     | NM_005243.3  | 12      | NM_173200.2    | 4       | Extraskeletal Myxoid Chondrosarcoma |
|         | Junction sequence | GTCCTATGAAGACCCACCCACTGCCAAGGCTGCCGTGGAATGGTTTGATG ATATGCCCTGCGTCCAAGCCCAATATAGCCCTTCCCTCCAGGTTCCAGT    |              |         |                |         |                                     |
| MO_1027 | ACLY-NF1          | 3                                                                                                       | NM_001096.2  | 25      | NM_000267.3    | 56      | Extrahepatic Cholangiocarcinoma     |
|         | Junction sequence | TGAAGAAGGAAGGGAAAGCTGATCATGGGCATTGGTCACCGAGTGAAGTCG CAAACACAAATTCCAGACTATGCTGAGCTTATTGTTAAGTTTTCTTGATGC |              |         |                |         |                                     |
| MO_1036 | FGFR2-BICC1       | 70                                                                                                      | NM_000141.4  | 17      | NM_001080512.2 | 3       | Extrahepatic Cholangiocarcinoma     |
|         | Junction sequence | AGCAGTTGGTAGAAGACTTGGATCGAATTCTCACTCTCACAACCAATGAG ATCATGGAGGAAACAAATACGCAGATTGCTTGGCCATCAAAACTGAAGAT   |              |         |                |         |                                     |
| MO_1037 | EWSR1-WT1         | 68                                                                                                      | NM_005243.3  | 7       | NM_000378.4    | 7       | Desmoplastic Small-Round-Cell Tumor |
|         | Junction sequence | CCAAGCTCCAAGTCAATATAGCCAACAGAGCAGCAGCTACGGGCAGCAGA GTGAGAAACCATAACAGTGTGACTTCAAGGACTGTGAACGAAGGTTTTCT   |              |         |                |         |                                     |
| MO_1039 | FGFR2-BICC1       | 1277                                                                                                    | NM_000141.4  | 17      | NM_001080512.2 | 3       | Intrahepatic Cholangiocarcinoma     |
|         | Junction sequence | AGCAGTTGGTAGAAGACTTGGATCGAATTCTCACTCTCACAACCAATGAG ATCATGGAGGAAACAAATACGCAGATTGCTTGGCCATCAAAACTGAAGAT   |              |         |                |         |                                     |
| MO_1040 | TMPRSS2-ERG       | 1358                                                                                                    | NM_005656.3  | 1       | NM_004449.4    | 4       | Prostate Adenocarcinoma             |
|         | Junction sequence | AGGCGGAGGGCGGAGGGCGAGGGGCGGGGAGCGCCGCTGGAGCGCGGCAG GAAGCCTTATCAGTTGTGAGTGAGGACCAGTCGTTGTTGAGTGTGCCTA    |              |         |                |         |                                     |
| MO_1042 | NF1-NRF1          | 59                                                                                                      | NM_000267.3  | 1       | NM_005011.4    | 3       | Adrenocortical Carcinoma            |
|         | Junction sequence | ACAGGCCGGTGAATGGTCCAGGCCGTGGTCAGCCGCTTCGACGAGCAG GTCCTGTGGGAATGGCCGCTGCTGTGCTGTGGCAACAGGAAAGAAACGG      |              |         |                |         |                                     |
| MO_1043 | EWSR1-ATF1        | 77                                                                                                      | NM_005243.3  | 8       | NM_005171.4    | 4       | Salivary Clear Cell Carcinoma       |
|         | Junction sequence | CGTGGAGGCATGAGCAGAGGTGGGCGGGGAGGAGGACGCGGTGGAATGGG AAAAAATTTTGAAGACTTATCTTCTGAAGATACACGGGGCAGAAAAGGAG   |              |         |                |         |                                     |
| MO_1044 | MYB-NFIB          | 593                                                                                                     | NM_005375.3  | 14      | NM_001282787.1 | 10      | Adenoid Cystic Carcinoma            |
|         | Junction sequence | TCAAAGCATTTACAGTACCTAAAAACAGGTCCCTGGCGAGCCCCCTGCGAG CTGAGGATTTGTGACTGGACCATGAATCAAAACGGCAGGCATTTATACCC  |              |         |                |         |                                     |
| MO_1049 | KDM6A-Xp11.3      | 15                                                                                                      | NM_021140.3  | 2       | Xp11.3         | na      | Bladder Squamous Cell Carcinoma     |
|         | Junction sequence | TCGTGAGATTTTCATGAAGATGGCGCCAGGACGAAGGCCCTACTGGGCAAG CCCATTTCTCACAGGTCCACTGACATATTACTTCGGCTCTTCTGAAAGAT  |              |         |                |         |                                     |
| MO_1051 | FGFR2-AFF3        | 69                                                                                                      | NM_000141.4  | 17      | NM_002285.2    | 7       | Breast Invasive Ductal Carcinoma    |
|         | Junction sequence | AGCAGTTGGTAGAAGACTTGGATCGAATTCTCACTCTCACAACCAATGAG GAGAGTAGATCTGGAGAAACCAACAGCTGTGTTGAAGAAATAATCCGGGT   |              |         |                |         |                                     |

**Supplementary Table 6 cont. Pathogenic Fusions in the Metastatic 500 Cohort**

| CASE    | FUSION            | READS                                                                                                   | 5' ACCESSION   | 5' EXON | 3' ACCESSION   | 3' EXON  | CANCER TYPE                         |
|---------|-------------------|---------------------------------------------------------------------------------------------------------|----------------|---------|----------------|----------|-------------------------------------|
| MO_1059 | APC-EEF1DP3       | 35                                                                                                      | NM_001127511.2 | 1       | BU599490       | 2        | Pancreatic Neuroendocrine Tumor     |
|         | Junction sequence | AGAGCCCGGGCGGCGCTCGTACTTCTGGCCACTGGGCGAGCGTCTGGCAG ATGAAAAGATTCTGAAGAATAGAGATCTTGAACATAGCATGGTGCCAGAC   |                |         |                |          |                                     |
| MO_1060 | CTNNA1-KDM3B      | 172                                                                                                     | NM_001903.4    | 6       | NM_016604.3    | 16       | High-Grade Serous Ovarian Cancer    |
|         | Junction sequence | ACCAGGGTGGAGGAGGAGGAGAAGTGGCATATGCACTCAATAACTTTGAC GGAGTGAAGAGCAAGGCCAGCCTACCCAACCTTCTTGACCACATCATTGC   |                |         |                |          |                                     |
| MO_1064 | MYB-NFIB          | 4                                                                                                       | NM_005375.3    | 15      | NM_001282787.1 | 11       | Adenoid Cystic Carcinoma            |
|         | Junction sequence | TGTAAGAAATAGTTTTATAAAAAATTATATTTTTATTCAGTAATTTAATT AAGGAACAAAAAGTAAATCCTGTTTTCATTTTTATCTCCCCTTTTAAAAAC  |                |         |                |          |                                     |
| MO_1065 | CTNNA1-KDM3B      | 47                                                                                                      | NM_001903.4    | 1       | NM_016604.3    | 16       | Breast Invasive Ductal Carcinoma    |
|         | Junction sequence | CCCCTCTGCTTCGGGCTCTGGAATTTAGCGCTCGCCAGCTAGCCGCAG GGAGTGAAGAGCAAGGCCAGCCTACCCAACCTTCTTGACCACATCATTGC     |                |         |                |          |                                     |
| MO_1066 | SMARCA1-Xq25      | 80                                                                                                      | NM_003069.4    | 19      | Xq25           | na       | Prostate Adenocarcinoma             |
|         | Junction sequence | AGCTCCTGGAAAAGGAAATCTTTTATTATCGGAAGACAATAGGCTATAAG GGTGTATGCACTGGTGAGCCATCTGATCCTTAATGTCATCTACTAGGTA    |                |         |                |          |                                     |
| MO_1066 | TMPRSS2-ERG       | 108                                                                                                     | NM_005656.3    | 1       | NM_004449.4    | 4        | Prostate Adenocarcinoma             |
|         | Junction sequence | AGGCGGAGGCGGAGGGCGAGGGGCGGGGAGCGCCGCTGGAGCGCGGCAG GAAGCCTTATCAGTTGTGAGTGAGGACCAGTCGTTGTTTGTGAGTGTGCCTA  |                |         |                |          |                                     |
| MO_1069 | ANKRD11-FANCA     | 102                                                                                                     | NM_000135.2    | 43      | NM_013275.5    | intron 2 | Breast Invasive Lobular Carcinoma   |
|         | Junction sequence | AGCCGTGGGCTGGCATCCCAGCGCTGTCTCCTCTCTTTGATCTTTGCATG GTCACAGAGGGGCTCGGTGGCCAGGTGGTGGTTCCGCCTCCAGGGGCAG    |                |         |                |          |                                     |
| MO_1069 | NF1-RP11-353N14.5 | 6                                                                                                       | NM_000267.3    | 1       | NR_110850.1    | 4        | Breast Invasive Lobular Carcinoma   |
|         | Junction sequence | ACAGGCCGGTGAATGGTCCAGGCCGTGGTCAGCCGCTTCGACGAGCAG AGTGAGAAAGCCGAGGCCAGAGAGGTCAAGGAACCTGCTCAAGGTCACG      |                |         |                |          |                                     |
| MO_1069 | CTNNA1-KDM3B      | 86                                                                                                      | NM_001903.4    | 3       | NM_016604.3    | 10       | Breast Invasive Lobular Carcinoma   |
|         | Junction sequence | GTTTCTCAAGGAGGAGCTTGTGGCTGCTGTAGAAGATGTTTCGAAAACAAG GTTGATCTTCACTCGAAAAGGGTACTCCGTGTGGAGGGGTTTTTAAGCC   |                |         |                |          |                                     |
| MO_1074 | PTEN-BTAF         | 188                                                                                                     | NM_000314.6    | 2       | NM_003972.2    | 2        | Prostate Adenocarcinoma             |
|         | Junction sequence | GCAGAAAGACTTGAAGCGTATACAGGAACAATATTGATGATGTAGTAAG GCTAGATCGCCTTTTTATTTTACTGGATACTGGCACTACTCCTGTTACAA    |                |         |                |          |                                     |
| MO_1076 | COL1A1-PDGFB      | 743                                                                                                     | NM_000088.3    | 20      | NM_002608.3    | 2        | Dermatofibrosarcoma Protuberans     |
|         | Junction sequence | AACCTGGTGCTCCTGGCAGCAAAGGAGACACTGGTGTAAAGGGAGAGCCT GGGGACCCCATTCGCCAGGAGCTTTATGAGATGCTGAGTGACCACTCGAT   |                |         |                |          |                                     |
| MO_1084 | ACPP-PIK3CB       | 283                                                                                                     | NM_001099.4    | 2       | NM_006219.2    | 1        | Prostate Adenocarcinoma             |
|         | Junction sequence | ACCCCATAAAGGAATCCTCATGGCCACAAGGATTTGGCCAACCTACCCAG GGCCCGTGGTTATGAATGTGCTTCAGTTTCATAATGCCTCCTGCTATGG    |                |         |                |          |                                     |
| MO_1084 | TMPRSS2-ERG       | 1653                                                                                                    | NM_005656.3    | 1       | NM_004449.4    | 4        | Prostate Adenocarcinoma             |
|         | Junction sequence | AGGCGGAGGCGGAGGGCGAGGGGCGGGGAGCGCCGCTGGAGCGCGGCAG GAAGCCTTATCAGTTGTGAGTGAGGACCAGTCGTTGTTTGTGAGTGTGCCTA  |                |         |                |          |                                     |
| MO_1085 | NBPF1-IGF1R       | 173                                                                                                     | NM_017940.4    | 1       | NM_000875.4    | 3        | Gastrointestinal Stromal Tumor      |
|         | Junction sequence | GGCTGCCCTGTGAATGGGAAGTTACGCGAAGTCCACCCAGCGTTTCTGAG TGTGCCCAAGCACGTGTGGGAAGCGGGCGTGCACCAGAGAACAATGAGTGC  |                |         |                |          |                                     |
| MO_1086 | KDM2B-DNAH10      | 96                                                                                                      | NM_032590.4    | 11      | NM_207437.3    | 39       | Undifferentiated Malignant Neoplasm |
|         | Junction sequence | GTGTCCCGGAGGGCATCGAGGACCCCAAGGCACTCCTGGAGGGTGTGAAG GTATATTTTATTTGATGGTGTGATGTGGATGCTCTATGGGTGAAAACATGA  |                |         |                |          |                                     |
| MO_1086 | NCOR2-SLC12A7     | 41                                                                                                      | NM_006312.5    | 2       | NM_006598.2    | 2        | Undifferentiated Malignant Neoplasm |
|         | Junction sequence | CAGGTCTCCCTGAGTCTTTGAGGACACAGCCTCGCTGGAGGCAGTTTCTG GAGATGGAAATCCAAGAGAAAACAGCCATTCTCAACAATGTCGAGGTG     |                |         |                |          |                                     |
| MO_1088 | EWSR1-NR4A3       | 800                                                                                                     | NM_005243.3    | 12      | NM_173200.2    | 4        | Extraskeletal Myxoid Chondrosarcoma |
|         | Junction sequence | GTCCTATGAAGACCCACCCACTGCCAAGGCTGCCGTGGAATGGTTTGTATG ATATGCCCTGCGTCCAAGCCCAATATAGCCCTTCCCCTCCAGGTTCCAGT  |                |         |                |          |                                     |
| MO_1090 | MRPL21-KDM2A      | 217                                                                                                     | NM_181515.1    | 4       | NM_012308.2    | 3        | Breast Invasive Ductal Carcinoma    |
|         | Junction sequence | TTGGAATGAAGTACTGACCTTGCCTGTGGAGAGAGAATTCGACTGGAGAAG CGTGGTACCATGCGACGACGCTATGAAGATGATGGCATTTCAGATGATGA  |                |         |                |          |                                     |
| MO_1093 | TMPRSS2-ERG       | 6                                                                                                       | NM_005656.3    | 2       | NM_004449.4    | 4        | Prostate Adenocarcinoma             |
|         | Junction sequence | ACCTATCATTACTCGATGCTGTTGATAACAGCAAGATGGCTTTGAACTCA GAAGCCTTATCAGTTGTGAGTGAGGACCAGTCGTTGTTTGTGAGTGTGCCTA |                |         |                |          |                                     |



**Supplementary Table 6 cont. Pathogenic Fusions in the Metastatic 500 Cohort**

| CASE    | FUSION            | READS                                                                                                    | 5' ACCESSION   | 5' EXON  | 3' ACCESSION   | 3' EXON | CANCER TYPE                       |
|---------|-------------------|----------------------------------------------------------------------------------------------------------|----------------|----------|----------------|---------|-----------------------------------|
| MO_1094 | KIAA1549-BRAF     | 80                                                                                                       | NM_020910.2    | 10       | NM_004333.4    | 9       | Prostate Adenocarcinoma           |
|         | Junction sequence | AGCTAGACTTTTCAGCCTGACACTGTGGCCAACATTTCAGCAGCGTCAGAAG GACTTGATTAGAGACCAAGGATTTTCGTGGTGATGGAGGATCAACCACAGG |                |          |                |         |                                   |
| MO_1094 | NCOR1-RNF43       | 81                                                                                                       | NM_006311.3    | 19       | NM_017763.5    | 3       | Prostate Adenocarcinoma           |
|         | Junction sequence | TGAAGATATTGAAGCCTCCAATGAAGAAGAAAATCCAGAAGACAGCGAAG TCCCACCCGCTGTACTGTGCAATGCCAGTGATGACGACAATCTGGAGCC     |                |          |                |         |                                   |
| MO_1095 | KDM5A-ATN1        | 93                                                                                                       | NM_001042603.2 | 27       | NM_001007026.1 | 5       | Prostate Adenocarcinoma           |
|         | Junction sequence | AGAATGCTGTGTGCGCAGCACAGAAGTCCAAAGGCCCTGCAAGGACAAG CAGGAAGTCCCTCGGCCACAGTCTCCCTCCGATCTGGATAGCTTGGACGG     |                |          |                |         |                                   |
| MO_1095 | TMPRSS2-ERG       | 147                                                                                                      | NM_005656.3    | 2        | NM_004449.4    | 4       | Prostate Adenocarcinoma           |
|         | Junction sequence | ACCTATCATTACTCGATGCTGTTGATAACAGCAAGATGGCTTTGAACTCA GAAGCCTTATCAGTTGTGAGTGAGGACCAGTCGTTGTTTGTGAGTGTGCCTA  |                |          |                |         |                                   |
| MO_1096 | UBN2-BRAF         | 129                                                                                                      | NM_173569.3    | 3        | NM_004333.4    | 11      | Prostate Adenocarcinoma           |
|         | Junction sequence | TAGGCTTTGGCTATGATGAGACAGATCCATTTATTGATAACTCAGAGGCT AAAAAGTCTGGTAGACGGGACTCGAGTGATGATTGGGAGATTCCCTGATGG   |                |          |                |         |                                   |
| MO_1107 | KAT6A-FGFR1       | 38                                                                                                       | NM_006766.4    | 5        | NM_023110.2    | 2       | Breast Invasive Ductal Carcinoma  |
|         | Junction sequence | AGGTTTTTCACATGGAGTGTGTGATCCGCCACTCACCCGTATGCCAAAAG GGTTCAGTTTGAAAAGGAGGATCGAGCTCACTGTGGAGTATCCATGGAGAT   |                |          |                |         |                                   |
| MO_1111 | ARID1B-KIF26B     | 26                                                                                                       | NM_017519.2    | 4        | NM_018012.3    | 3       | Lung Adenocarcinoma               |
|         | Junction sequence | ACCATGAAGACTTGAACCTAATACAGCAAGAAAGACCATCAAGTTTACCA GACCTTGCTTTCTCGCTGTGATTACGACAAAACCTCAGGTCCCCAACAC     |                |          |                |         |                                   |
| MO_1112 | TMPRSS2-ERG       | 38                                                                                                       | NM_005656.3    | 4        | NM_004449.4    | 4       | Prostate Adenocarcinoma           |
|         | Junction sequence | AGGCGGAGGCGGAGGGCGAGGGGCGGGGAGCGCCGCTGGAGCGCGGCAG GAAGCCTTATCAGTTGTGAGTGAGGACCAGTCGTTGTTTGTGAGTGTGCCTA   |                |          |                |         |                                   |
| MO_1112 | TRIM68-ARID1B     | 8                                                                                                        | NM_018073.7    | 7        | NM_017519.2    | 19      | Prostate Adenocarcinoma           |
|         | Junction sequence | GTCTGAGGACAGAAAACGTGTGCACTATGGAGACACCAACCAGAAAACCTGC CAGACTCACTTTGAGAGCAAGATGGAAATTCCTCCTCGCAGGCGCCACC   |                |          |                |         |                                   |
| MO_1114 | TMPRSS2-ERG       | 173                                                                                                      | NM_005656.3    | 1        | NM_004449.4    | 4       | Prostate Adenocarcinoma           |
|         | Junction sequence | AGGCGGAGGCGGAGGGCGAGGGGCGGGGAGCGCCGCTGGAGCGCGGCAG GAAGCCTTATCAGTTGTGAGTGAGGACCAGTCGTTGTTTGTGAGTGTGCCTA   |                |          |                |         |                                   |
| MO_1114 | ZFH3-LMF1         | 353                                                                                                      | NM_006885.3    | 3        | NM_022773.2    | 11      | Prostate Adenocarcinoma           |
|         | Junction sequence | GGCTGCACACGGTCAACTCCAGGCACGAGGCCAGCTGAAGTTGTACAAG GTGGGTCCGAGGAGAGCACTACAGGTACAAGTTCAGCCGCTCTGGGGCA      |                |          |                |         |                                   |
| MO_1118 | NCOR1-PKD1L1      | 69                                                                                                       | NM_006311.3    | 40       | NM_138295.3    | 54      | Prostate Neuroendocrine Carcinoma |
|         | Junction sequence | CCAGGTTCAAGGTCTCTCCAGAAAATCTTGTGGACAAAATCCAGGGGAAG CTGGTGGGGGCACTGATGCTGGCCGCCCTCTCCACCTGCACCGATTCT      |                |          |                |         |                                   |
| MO_1118 | TMPRSS2-ERG       | 6                                                                                                        | NM_001135099.1 | 1        | NM_004449.4    | 4       | Prostate Neuroendocrine Carcinoma |
|         | Junction sequence | CCCTGCCCCGCCGAGGTGAAAGCGGGTGTGAGGAGCGCGCGCGGCAG GAAGCCTTATCAGTTGTGAGTGAGGACCAGTCGTTGTTTGTGAGTGTGCCTA     |                |          |                |         |                                   |
| MO_1124 | KMT2C-LIPJ        | 34                                                                                                       | NM_170606.2    | 2        | NM_001010939.2 | 2       | Prostate Adenocarcinoma           |
|         | Junction sequence | CAGCATGGATGGGCTGGAGACAACAGAAAACAGAAACGATTGTGAAAACAG TATAATATGCTTTTTCTTAGCTTTCCTATGACTCTACTTAGCAACTTTTG   |                |          |                |         |                                   |
| MO_1124 | TMPRSS2-ERG       | 64                                                                                                       | NM_005656.3    | 1        | NM_004449.4    | 4       | Prostate Adenocarcinoma           |
|         | Junction sequence | AGGCGGAGGCGGAGGGCGAGGGGCGGGGAGCGCCGCTGGAGCGCGGCAG GAAGCCTTATCAGTTGTGAGTGAGGACCAGTCGTTGTTTGTGAGTGTGCCTA   |                |          |                |         |                                   |
| MO_1126 | GLIS3-NF1         | 11                                                                                                       | NM_152629.3    | intron 3 | NM_000267.3    | 31      | Breast Invasive Ductal Carcinoma  |
|         | Junction sequence | CCACCTCATCTAACTCCCTCAATTTTCTAGGCCATAAAAATACAGGCCAG GTGGTTAGCCAGCGTTTCCCTCAGAACAGCATCGGTGCAGTAGGAAGTGC    |                |          |                |         |                                   |
| MO_1133 | SS18-SSX1         | 145                                                                                                      | NM_001007559.2 | 10       | NM_001278691.1 | 7       | Synovial Sarcoma                  |
|         | Junction sequence | AGCCTGGACCACCACAGCCACCCAGCAGAGGCCTTATGGATATGACCAG ATCATGCCCAAGAAGCCAGCAGAGGACGAAAATGATTCGAAGGGAGTGTCT    |                |          |                |         |                                   |
| MO_1136 | DNAJB1-PRKACA     | 1070                                                                                                     | NM_006145.2    | 1        | NM_002730.3    | 2       | Fibrolamellar Carcinoma           |
|         | Junction sequence | GCTCAGCGACCCGCGCAAGCGCGAGATCTTCGACCGCTACGGGGAGGAAG TGAAAGAATTCTTAGCCAAAAGCCAAAAGAGATTTTCTTAAAAAATGGGAA   |                |          |                |         |                                   |
| MO_1146 | NF1-6p24.1        | 5                                                                                                        | NM_000267.3    | 8        | 6p24.1         | na      | Cutaneous Melanoma                |
|         | Junction sequence | TAATCCAGGATATATCCAAGACGTGGTTGATGAAAACAACATGAATAAG ATTTATCTATGGGCAGGACTTCGAGGAGGCTCCCTTAATCAGAGTCTTA      |                |          |                |         |                                   |

**Supplementary Table 6 cont. Pathogenic Fusions in the Metastatic 500 Cohort**

| CASE    | FUSION                             | READS | 5' ACCESSION                                        | 5' EXON  | 3' ACCESSION   | 3' EXON                                                | CANCER TYPE                                      |
|---------|------------------------------------|-------|-----------------------------------------------------|----------|----------------|--------------------------------------------------------|--------------------------------------------------|
| MO_1146 | KRAS-LYRM5<br>Junction sequence    | 6     | NM_004985.4                                         | 4        | NM_001001660.2 | 3                                                      | Cutaneous Melanoma                               |
|         |                                    |       | AGCAAGAAGTTATGGAATTCCTTTTATTTGAAACATCAGCAAAGACAAGAC |          |                | AGCTGCTGTATCTTGGACGAGACTATCCAAAAGGAGCAGACTATTTTAAA     |                                                  |
| MO_1149 | ASPCR1-TFE3<br>Junction sequence   | 33    | NM_024083.3                                         | 7        | NM_006521.5    | 6                                                      | Alveolar Soft Part Sarcoma                       |
|         |                                    |       | AGGAGCAGGAGCGGGAGCGGGATCCCCAGCAGGAGCAGGAGCGGGAGCGG  |          |                | CTGCCTGTGTCAGGGAATCTGCTTGATGTGTACAGTAGTCAAGGCGTGCC     |                                                  |
| MO_1155 | MYB-NFIB<br>Junction sequence      | 382   | NM_005375.3                                         | 13       | NM_001282787.1 | 8                                                      | Adenoid Cystic Carcinoma                         |
|         |                                    |       | GTCTGAATACCCAACCTGTTACGCAGACCTCGCCTGTGGCAGATGCACCG  |          |                | CCTAACGGCAGTGGTCAAGTAGTAGGGAAAGTGCCTGGCCATTTCACTCC     |                                                  |
| MO_1157 | TP53-17p11.2<br>Junction sequence  | 744   | NM_000546.5                                         | 9        | NM_001145045.1 | 5                                                      | Uterine Leiomyosarcoma                           |
|         |                                    |       | CCCCAGCCAAAGAAGAAACCCTGGATGGAGAATATTTACCCCTTCAGGT   |          |                | GGTGGCCAGAGTTGGTCCATGAGTCCAGGCCACAGTTTGTCAATTCCTG      |                                                  |
| MO_1159 | AXIN1-12q13.2<br>Junction sequence | 22    | NM_003502.3                                         | 3        | 12q13.2        | na                                                     | Breast Invasive Ductal Carcinoma                 |
|         |                                    |       | CAGAGCCTGTCCAGCGATGCAGACACCCTGTCCCTCACGGACAGCAGCGT  |          |                | AGACTACACTGAGGAGTATGACAAGTTTTTCAGCTTGAGAAGGGCTTGCAT    |                                                  |
| MO_1159 | KDM4B-DOCK6<br>Junction sequence   | 247   | NM_015015.2                                         | 18       | NM_020812.3    | 10                                                     | Breast Invasive Ductal Carcinoma                 |
|         |                                    |       | AGCGCCACCCTGTGGACATCAGCGCCATCCCCGAGCAGCGGTGGAAGCTG  |          |                | TTGGAGAAGGTGCTTCAGCAAGGGGACATCAGTGTGCTGTGAGCCTTA       |                                                  |
| MO_1161 | NCOR2-KIRREL3<br>Junction sequence | 44    | NM_006312.5                                         | 2        | NM_032531.3    | 2                                                      | Prostate Adenocarcinoma                          |
|         |                                    |       | CAGGTCTCCCTGAGTCTTTGAGGACACAGCCTCGCTGGAGGCAGTTTCTG  |          |                | AGCTGGGCCCTCCAGAAGAGAGGATGCTGTCTGGTGTGGGCTACATGGCC     |                                                  |
| MO_1161 | TMPRSS2-ERG<br>Junction sequence   | 119   | NM_005656.3                                         | 1        | NM_004449.4    | 4                                                      | Prostate Adenocarcinoma                          |
|         |                                    |       | AGGCGGAGGCGGAGGGCGAGGGGCGGGGAGCGCCGCTGGAGCGCGGCAG   |          |                | GAAGCCTTATCAGTTGTGAGTGTGAGGACCAGTCGTTGTTTGTGAGTGTGCCTA |                                                  |
| MO_1167 | ARID2-2q34<br>Junction sequence    | 14    | NM_152641.2                                         | 5        | 2q34           | na                                                     | Breast Invasive Ductal Carcinoma                 |
|         |                                    |       | TCCTAAAATCATCACTTTACTACTTGCTAATGCCGGGTGTTTGACGACA   |          |                | ATTTTACTCATCCAGGAAATGAACTGCCAGAATATGTGATGAGACTAGAA     |                                                  |
| MO_1176 | TMPRSS2-ERG<br>Junction sequence   | 93    | NM_005656.3                                         | 1        | NM_004449.4    | 4                                                      | Prostate Adenocarcinoma                          |
|         |                                    |       | AGGCGGAGGCGGAGGGCGAGGGGCGGGGAGCGCCGCTGGAGCGCGGCAG   |          |                | GAAGCCTTATCAGTTGTGAGTGTGAGGACCAGTCGTTGTTTGTGAGTGTGCCTA |                                                  |
| MO_1177 | NF2-OSBP2<br>Junction sequence     | 103   | NM_000268.3                                         | 1        | NM_030758.3    | 3                                                      | Lung Squamous Cell Carcinoma                     |
|         |                                    |       | TCACCGTGAGGATCGTACCATGGACGCCGAGATGGAGTTCAATTGCGAG   |          |                | ATGACTCTGGGGACGACGACGAGGCTACCACCCAGCCGACAAGAGCGAG      |                                                  |
| MO_1179 | TMPRSS2-ERG<br>Junction sequence   | 93    | NM_005656.3                                         | 1        | NM_004449.4    | 4                                                      | Prostate Adenocarcinoma                          |
|         |                                    |       | AGGCGGAGGCGGAGGGCGAGGGGCGGGGAGCGCCGCTGGAGCGCGGCAG   |          |                | GAAGCCTTATCAGTTGTGAGTGTGAGGACCAGTCGTTGTTTGTGAGTGTGCCTA |                                                  |
| MO_1180 | EWSR1-NR4A3<br>Junction sequence   | 547   | NM_005243.3                                         | 12       | NM_173200.2    | 4                                                      | Extraskeletal Myxoid Chondrosarcoma              |
|         |                                    |       | GTCCATGAAGACCCACCCACTGCCAAGGCTGCCGTGGAATGGTTTGATG   |          |                | ATATGCCCTGCGTCCAAGCCCAATATAGCCCTTCCCCTCCAGGTTCCAGT     |                                                  |
| MO_1188 | PTEN-SGMS1<br>Junction sequence    | 136   | NM_000314.6                                         | intron 1 | NM_147156.3    | intron 1                                               | Breast Invasive Ductal Carcinoma                 |
|         |                                    |       | AATAAACTTCAGTTTCATGCTTGAAATTTAAGTATTGTTGTGATGCCAGA  |          |                | GGTTATGTTGGTGGAAATACCTCCCCTAATGCTGGTTTTAAATAGCATAAA    |                                                  |
| MO_1189 | TP53-CELSR1<br>Junction sequence   | 29    | NM_000546.5                                         | 9        | NM_014246.1    | 19                                                     | Poorly Differentiated Non-Small Cell Lung Cancer |
|         |                                    |       | CTCCCAGCCAAAGAAGAAACCCTGGATGGAGAATATTTACCCCTTCAG    |          |                | GACGTATCCACTCGGCAGCGCCCTCCTGGCCCCAGCCACCAGGGCGGC       |                                                  |
| MO_1190 | NF1-TSPAN18<br>Junction sequence   | 162   | NM_000267.3                                         | 1        | NM_130783.4    | 2                                                      | Breast Invasive Lobular Carcinoma                |
|         |                                    |       | ACAGGCCCGTGGAATGGGTCCAGGCCGTGGTCAGCCGCTTCGACGAGCAG  |          |                | GTGAGCATCTCCTGGACCACCCTCAAGCTTCAGGTGAGCTGAGCTTCTAA     |                                                  |
| MO_1192 | TMPRSS2-ERG<br>Junction sequence   | 237   | NM_005656.3                                         | 1        | NM_004449.4    | 4                                                      | Prostate Adenocarcinoma                          |
|         |                                    |       | AGGCGGAGGCGGAGGGCGAGGGGCGGGGAGCGCCGCTGGAGCGCGGCAG   |          |                | GAAGCCTTATCAGTTGTGAGTGTGAGGACCAGTCGTTGTTTGTGAGTGTGCCTA |                                                  |
| MO_1198 | XPR-NF1<br>Junction sequence       | 19    | NM_004736.3                                         | 2        | NM_000267.3    | 48                                                     | Bladder Urothelial Carcinoma                     |
|         |                                    |       | TTTCAAGGATATGCTGTATTTCAGCTCAGGACCAGGCACCTTCTGTGGAAG |          |                | GGTACAGGCATCCTTCACCTGCTATTGTTGCAAGAACAGTCAAGATTTTA     |                                                  |
| MO_1198 | NF1-BCAS3<br>Junction sequence     | 6     | NM_000267.3                                         | 1        | NM_017679.3    | 23                                                     | Bladder Urothelial Carcinoma                     |
|         |                                    |       | ACAGGCCCGTGGAATGGGTCCAGGCCGTGGTCAGCCGCTTCGACGAGCAG  |          |                | GTACCTTTGACAGGAGCGTGACCCTGCTGGAGGTGTGCGGGAGCTGGCCT     |                                                  |

**Supplementary Table 6 cont. Pathogenic Fusions in the Metastatic 500 Cohort**

| CASE    | FUSION            | READS                                                                                                    | 5' ACCESSION   | 5' EXON | 3' ACCESSION   | 3' EXON  | CANCER TYPE                          |
|---------|-------------------|----------------------------------------------------------------------------------------------------------|----------------|---------|----------------|----------|--------------------------------------|
| MO_1202 | GRHL2-RSPO2       | 18                                                                                                       | NM_024915.3    | 8       | NM_178565.4    | 2        | Prostate Adenocarcinoma              |
|         | Junction sequence | TTGCATATAATGCTGTTTCCTTTACCTGGGACGTGAATGAAGAGGCGAAG GTTCGTGGCGGAGAGATGCTGATCGCGCTGAACTGACCGGTGCGGCCGG     |                |         |                |          |                                      |
| MO_1202 | TMPRSS2-ERG       | 125                                                                                                      | NM_005656.3    | 1       | NM_004449.4    | 4        | Prostate Adenocarcinoma              |
|         | Junction sequence | AGGCGGAGGCGGAGGGCGAGGGGCGGGGAGCGCCGCCTGGAGCGCGGCAG GAAGCCTTATCAGTTGTGAGTGAGGACCAGTCGTTGTTTGTGAGTGTGCCTA  |                |         |                |          |                                      |
| MO_1203 | FGFR2-KIAA1967    | 486                                                                                                      | NM_000141.4    | 17      | NM_021174.5    | 4        | Intrahepatic Cholangiocarcinoma      |
|         | Junction sequence | AGCAGTTGGTAGAAGACTTGGATCGAATTCTCACTCTCACAACCAATGAG GGTGGGGAGAAACAGCGGGTCTTCACTGGTATTGTTACCAGCTTGCATGA    |                |         |                |          |                                      |
| MO_1208 | NOTCH2-DENND5B    | 25                                                                                                       | NM_024408.3    | 11      | NM_144973.3    | intron 1 | Undifferentiated Pleomorphic Sarcoma |
|         | Junction sequence | CATTGACCTGGTCAATGGCTACCAGTGCAACTGCCAGCCAGGCACGTCAG CAACAAGAAACAAAACAAGAGCAACCCACTGCAACCATAGACTGGCTGCC    |                |         |                |          |                                      |
| MO_1209 | FGFR3-TACC3       | 231                                                                                                      | NM_000142.4    | 17      | NM_006342.2    | 10       | Clear Cell Carcinoma of the Lung     |
|         | Junction sequence | AGCAGCTGGTGGAGGACTGGACCGTGTCTTACCCTGACGTCCACCGAC GTGCCAGGCCACCCCCAGGTGTTCCCGCGCCTGGGGGCCACCCCTGTC        |                |         |                |          |                                      |
| MO_1210 | SLC12A7-TERT      | 21                                                                                                       | NM_006598.2    | 8       | NM_198253.2    | 3        | Hepatocellular Carcinoma             |
|         | Junction sequence | CGTCACCGAAATCCAGGGCATCCCGGGCGCGCCAGTGGTGTCTTCTCTGG GGGTTGGCTGTGTTCCGGCCGAGAGCACCGTCTGCGTGAGGAGATCCTG     |                |         |                |          |                                      |
| MO_1211 | EWSR1-WT1         | 275                                                                                                      | NM_005243.3    | 7       | NM_000378.4    | 7        | Desmoplastic Small-Round-Cell Tumor  |
|         | Junction sequence | CCAAGCTCCAAGTCAATATAGCCAACAGAGCAGCAGCTACGGGCAGCAGA GTGAGAAACCATAACAGTGTGACTTCAAGGACTGTGAACGAAGGTTTCT     |                |         |                |          |                                      |
| MO_1215 | TMPRSS2-ERG       | 3                                                                                                        | NM_001135099.1 | 1       | NM_004449.4    | 3        | Prostate Neuroendocrine Carcinoma    |
|         | Junction sequence | CCCTGCCCGCCCGGAGGTGAAAGCGGGTGTGAGGAGCGCGCGCGGCAG CCGTCAGGTTCTGAACAGCTGGTAGATGGGCTGGCTTACTGAAGGACATG      |                |         |                |          |                                      |
| MO_1217 | LATS2-13q12.11    | 57                                                                                                       | NM_014572.2    | 2       | 13q12.11       | na       | Undifferentiated Malignant Neoplasm  |
|         | Junction sequence | AAGTGAACCGGCAAATGCTGCAGGAACTGGTGAACGCAGGATGCGACCAG GATGCCAGATCTGATCAAAGCCCTGTCATCCCTTCATCAAGGCCAGGGT     |                |         |                |          |                                      |
| MO_1219 | RNF139-PVT1       | 6                                                                                                        | NM_007218.3    | 1       | NR_003367.3    | 2        | Prostate Adenocarcinoma              |
|         | Junction sequence | CAGCCAAAGCCGGTTCGTCATCGTGTCCAGATCTTCTCCGGCTCTTTG GCCTGATCTTTTGGCCAGAAGGAGATTAAAAAGATGCCCTCAAGATGGC       |                |         |                |          |                                      |
| MO_1220 | EWSR1-WT1         | 344                                                                                                      | NM_005243.3    | 9       | NM_000378.4    | 7        | Desmoplastic Small-Round-Cell Tumor  |
|         | Junction sequence | TTATCCCCCAGCAGCGCTGGAGAGCGAGGTGGCTTCAATAAGCCTGGTG GTGAGAAACCATAACAGTGTGACTTCAAGGACTGTGAACGAAGGTTTCT      |                |         |                |          |                                      |
| MO_1222 | EWSR1-NR4A3       | 48                                                                                                       | NM_005243.3    | 12      | NM_173200.2    | 2        | Extraskeletal Myxoid Chondrosarcoma  |
|         | Junction sequence | GTCCTATGAAGACCCACCCACTGCCAAGGCTGCCGTGGAATGGTTTGATG AGCCCACTGCGGAAGAGGGCAGCCCGCAAGCCCGGCCCTGAGCCTGGA      |                |         |                |          |                                      |
| MO_1229 | FUS-DDIT3         | 2                                                                                                        | NM_004960.3    | 5       | NM_001195053.1 | 2        | Myxoid/Round-Cell Liposarcoma        |
|         | Junction sequence | GAACCAGTACAACAGCAGCAGTGGTGGTGGAGGTGGAGGTGGAGGTGGAG TGTTCAGAAGGAAGTGTATCTTCATACATCACACACCTGAAAGCAGGT      |                |         |                |          |                                      |
| MO_1231 | PLCD3-NF1         | 3                                                                                                        | NM_133373.4    | 11      | NM_000267.3    | 2        | Stomach Adenocarcinoma               |
|         | Junction sequence | CTCAGCCAACACTACAGTCCCCAGGAGATGTGGAACCTCGGGCTGTGAGCTGG CTTCCAATAAAAACAGGACAGCAGAACACACATACCAAAGTCAGTACTGA |                |         |                |          |                                      |
| MO_1232 | CTNNA1-GLRA1      | 109                                                                                                      | NM_001903.4    | 7       | NM_001146040.1 | 4        | Prostate Adenocarcinoma              |
|         | Junction sequence | ATGCTGTCCGCCAGGCCCTGCAGGACCTGCTTTCGGAGTACATGGGCAAT GACTATAGGGTCAACATCTTCTGCGCAGCAATGGAACGACCCCGCCT       |                |         |                |          |                                      |
| MO_1237 | PVT1-CASC8        | 16                                                                                                       | DA022452       | 1       | NR_117099.1    | 3        | Breast Invasive Ductal Carcinoma     |
|         | Junction sequence | GAAACCTCGTGGCCTGGTCTCCATTATTTGAGATGAGTTACATCTTGGAG AGGTGCTTATTTAGCAAATTCAACCTTAAACCTGAGTGCATGGAAACTAT    |                |         |                |          |                                      |
| MO_1241 | TMPRSS2-ERG       | 238                                                                                                      | NM_005656.3    | 1       | NM_004449.4    | 4        | Prostate Adenocarcinoma              |
|         | Junction sequence | AGGCGGAGGCGGAGGGCGAGGGGCGGGGAGCGCCGCCTGGAGCGCGGCAG GAAGCCTTATCAGTTGTGAGTGAGGACCAGTCGTTGTTTGTGAGTGTGCCTA  |                |         |                |          |                                      |
| MO_1241 | TP53-IGFL2        | 15                                                                                                       | NM_000546.5    | 1       | AC007193.6     | 3        | Prostate Adenocarcinoma              |
|         | Junction sequence | TCGGGCTGGGAGCGTGTCTTCCACGACGGTGACACGCTTCCCTGGATTGG AGGCTGGAGTGCAGTGGCATGATCTCAGCTGACTACAACCTCCACCTCCC    |                |         |                |          |                                      |
| MO_1244 | TMPRSS2-ERG       | 324                                                                                                      | NM_005656.3    | 1       | NM_004449.4    | 4        | Prostate Adenocarcinoma              |
|         | Junction sequence | AGGCGGAGGCGGAGGGCGAGGGGCGGGGAGCGCCGCCTGGAGCGCGGCAG GAAGCCTTATCAGTTGTGAGTGAGGACCAGTCGTTGTTTGTGAGTGTGCCTA  |                |         |                |          |                                      |

**Supplementary Table 6 cont. Pathogenic Fusions in the Metastatic 500 Cohort**

| CASE    | FUSION                             | READS                                                      | 5' ACCESSION   | 5' EXON  | 3' ACCESSION   | 3' EXON  | CANCER TYPE                                      |
|---------|------------------------------------|------------------------------------------------------------|----------------|----------|----------------|----------|--------------------------------------------------|
| MO_1249 | TMPRSS2-ERG<br>Junction sequence   | 520<br>ACCTATCATTACTCGATGCTGTTGATAACAGCAAGATGGCTTTGAACTCA  | NM_005656.3    | 2        | NM_004449.4    | 4        | Prostate Adenocarcinoma                          |
| MO_1249 | TP53-MYBBP1A<br>Junction sequence  | 12<br>GTTCAACTTTGAGTTCGGATGGTCCCTAACATCCCCATCATCTACACCCAG  | NM_000546.5    | intron 1 | NM_014520.3    | 11       | Prostate Adenocarcinoma                          |
| MO_1252 | NCOR1-MAPK7<br>Junction sequence   | 18<br>CACTCCTCAGGCCGGGGCGCACGTCGGCTCCCACGCTTAGCCAGCTCCCG   | NM_006311.3    | 1        | NM_002749.3    | 4        | Dedifferentiated Liposarcoma                     |
| MO_1253 | EML4-ALK<br>Junction sequence      | 39<br>AAAAGTTACCAAACTGCAGACAAGCATAAAGATGTCATCATCAACCAAG    | NM_019063.4    | 6        | NM_004304.4    | 20       | Lung Adenocarcinoma                              |
| MO_1260 | PRKCE-MSH2<br>Junction sequence    | 3<br>CTGTGGGTCCCTGCTCTGGGGACTCTTGCGGCAGGGTTTGAGTGTAAAG     | NM_005400.2    | 6        | NM_000251.2    | 8        | Prostate Adenocarcinoma                          |
| MO_1260 | TMPRSS2-ERG<br>Junction sequence   | 147<br>AGGCGGAGGCGGAGGGCGAGGGGCGGGGAGCGCCGCTGGAGCGCGGCAG   | NM_005656.3    | 1        | NM_004449.4    | 4        | Prostate Adenocarcinoma                          |
| MO_1262 | TMPRSS2-ETV4<br>Junction sequence  | 1324<br>AGGCGGAGGCGGAGGGCGAGGGGCGGGGAGCGCCGCTGGAGCGCGGCAG  | NM_005656.3    | 1        | NM_001986.2    | 3        | Prostate Adenocarcinoma                          |
| MO_1263 | TMPRSS2-ERG<br>Junction sequence   | 20<br>CCCTGCCCGCCCGGAGGTGAAAGCGGGTGTGAGGAGCGCGCGCGGCAG     | NM_001135099.1 | 1        | NM_004449.4    | 4        | Prostate Adenocarcinoma                          |
| MO_1264 | DNAJB1-PRKACA<br>Junction sequence | 1504<br>GCTCAGCGACCCGCGCAAGCGCGAGATCTTCGACCGCTACGGGGAGGAAG | NM_006145.2    | 1        | NM_002730.3    | 2        | Fibrolamellar Carcinoma                          |
| MO_1265 | CCDC61-ALK<br>Junction sequence    | 34<br>CCACCATCAGAAATCTCTGGCCAACCTCCGGGGCTGGGTCCCCATCAAAG   | NM_001267723.1 | 13       | NM_004304.4    | 20       | Colon Adenocarcinoma                             |
| MO_1267 | PARS2-NOTCH2<br>Junction sequence  | 133<br>GCTGGCCCGGCACGGCGGTGGTCTTGCGGGAGGCGTGGGCTGGGATTGCG  | NM_152268.3    | 1        | NM_024408.3    | 27       | Breast Invasive Ductal Carcinoma                 |
| MO_1267 | PVT1-GSDMB<br>Junction sequence    | 16<br>GGCTCCCTTGGTGTCCCTTTTACTGCCAGGACACTGAGATTTGGAGAG     | NR_003367.3    | 3        | NM_001042471.1 | 2        | Breast Invasive Ductal Carcinoma                 |
| MO_1269 | NF1-ASIC2<br>Junction sequence     | 50<br>AAGCTGGGACTTCCAAAGCTGGGAATCCTATTTTTTATTATGTTGCACGG   | NM_000267.3    | 35       | NM_001094.4    | intron 1 | Breast Invasive Ductal Carcinoma                 |
| MO_1276 | AKT1-PHRF1<br>Junction sequence    | 603<br>CAGGGGCTGAAGAGATGGAGGTGTCCCTGGCCAAGCCAAGCACCCGCGTG  | NM_005163.2    | 5        | NM_020901.3    | 2        | Breast Invasive Ductal Carcinoma                 |
| MO_1277 | TMPRSS2-ERG<br>Junction sequence   | 387<br>AGGCGGAGGCGGAGGGCGAGGGGCGGGGAGCGCCGCTGGAGCGCGGCAG   | NM_005656.3    | 1        | NM_004449.4    | 4        | Prostate Adenocarcinoma                          |
| MO_1277 | TP53-CDC16<br>Junction sequence    | 119<br>TCGGGCTGGGAGCGTGCTTTCCACGACGGTGACACGCTTCCCTGGATTGG  | NM_000546.5    | 1        | NM_003903.4    | 12       | Prostate Adenocarcinoma                          |
| MO_1284 | KIF5B-RET<br>Junction sequence     | 179<br>TAAAAGACCTTGCAGAAATAGGAATTGCTGTGGGAAATAATGATGTAAAG  | NM_004521.2    | 15       | NM_020975.4    | 12       | Lung Adenocarcinoma                              |
| MO_1285 | EML4-ALK<br>Junction sequence      | 237<br>TATATGGAGCAAACTACTGTAGAGCCACACCTGGGAAAGGACCTAAAG    | NM_019063.4    | 13       | NM_004304.4    | 20       | Poorly Differentiated Non-Small Cell Lung Cancer |
| MO_1286 | AKAP13-IGF1R<br>Junction sequence  | 9<br>GTGAAGAGTTGTCCCAGCTCGGCCCGGGGGAGCCCCGGGAGCCGCACG      | NM_006738.5    | 1        | NM_000875.4    | 2        | Lung Squamous Cell Carcinoma                     |

**Supplementary Table 6 cont. Pathogenic Fusions in the Metastatic 500 Cohort**

| CASE    | FUSION                                 | READS | 5' ACCESSION                                        | 5' EXON | 3' ACCESSION   | 3' EXON                                               | CANCER TYPE                         |
|---------|----------------------------------------|-------|-----------------------------------------------------|---------|----------------|-------------------------------------------------------|-------------------------------------|
| MO_1287 | GOSR1-NF1<br>Junction sequence         | 5     | NM_004871.2                                         | 4       | NM_000267.3    | 5                                                     | Breast Invasive Ductal Carcinoma    |
|         |                                        |       | TGAATGCAGCCCTGATGCATACATTACAGCGGCATAGACATATTCGAG    |         |                | GTTACAGGAATTAAGTGTGTTGTTTCAGAAGACAATGTTGATGTTTCATGATA |                                     |
| MO_1295 | EWSR1-WT1<br>Junction sequence         | 383   | NM_005243.3                                         | 7       | NM_000378.4    | 7                                                     | Desmoplastic Small-Round-Cell Tumor |
|         |                                        |       | CCAAGCTCCAAGTCAATATAGCCAACAGAGCAGCAGCTACGGGCAGCAGA  |         |                | GTGAGAAACCATAACCGAGTGTGACTTCAAGGACTGTGAACGAAGGTTTTCT  |                                     |
| MO_1298 | SEC22B-NOTCH2<br>Junction sequence     | 399   | NM_004892.5                                         | 1       | NM_024408.3    | 27                                                    | Breast Invasive Ductal Carcinoma    |
|         |                                        |       | GAGTGGCGGACGGGCTCCCGCTGGCCGCTCGATGCAGGAGGACGAACAG   |         |                | CTCTAAAGTCTTTCTGGAAATTGACAACCGCCAGTGTGTTCAAGACTCAG    |                                     |
| MO_1301 | DNAJC1-BRCA1<br>Junction sequence      | 220   | NM_003315.3                                         | 1       | NM_007294.3    | 2                                                     | Breast Invasive Ductal Carcinoma    |
|         |                                        |       | GTAATGGCGGCGACCGAGCCGGAGCTGCTCGACGACCAAGAGGCGAAGAG  |         |                | TTCATTGGAACAGAAAAGAAATGGATTTATCTGCTCTTCGCGTTGAAGAAG   |                                     |
| MO_1313 | ARFGAP3-ATM<br>Junction sequence       | 231   | NM_001142293.1                                      | 10      | NM_000051.3    | 23                                                    | Soft Tissue Myoepithelial Carcinoma |
|         |                                        |       | AAAAAGTATAATGATGACAGTGACGATTCATATTTTACTTCCAGCTCAAG  |         |                | ATTGTTCCAGGACACGAAGGGAGATTCTTCCAGGTTACTGAAAGCACTTC    |                                     |
| MO_1315 | KIF5B-RET<br>Junction sequence         | 303   | NM_004521.2                                         | 23      | NM_020975.4    | 12                                                    | Lung Squamous Cell Carcinoma        |
|         |                                        |       | TCTCCTTTCTTGAAAATAATCTTGAACAGCTCACTAAAGTGCACAAACAG  |         |                | GAGGATCCAAAGTGGGAATCCCTCGGAAGAACTTGGTTCTTGGAAAAAC     |                                     |
| MO_1316 | TMPRSS2-ERG<br>Junction sequence       | 379   | NM_005656.3                                         | 1       | NM_004449.4    | 4                                                     | Prostate Adenocarcinoma             |
|         |                                        |       | AGGCGGAGGCGGAGGGCGAGGGGCGGGGAGCGCCGCTGGAGCGCGGCAG   |         |                | GAAGCCTTATCAGTTGTGAGTGAGGACCAGTCGTTGTTGAGTGTGCCTA     |                                     |
| MO_1317 | ARSG-PPM1D<br>Junction sequence        | 34    | NM_014960.4                                         | 11      | NM_003620.3    | 2                                                     | Breast Invasive Ductal Carcinoma    |
|         |                                        |       | AGCCCTGCAGACTGTCCGCTGGAGCGTTACAAGGCCTTCTACATTACCG   |         |                | CGGAATGGCCAAAGACTATGACGGGTCTTCTAGCACATCAGGGACAAC      |                                     |
| MO_1317 | FAM134C-BRCA1<br>Junction sequence     | 40    | NM_178126.3                                         | 1       | NM_007294.3    | 2                                                     | Breast Invasive Ductal Carcinoma    |
|         |                                        |       | CGGCCAGCTAGGAGCGCTCTGTGGTGCCTGGGGCTGAACGCGGCTTTCTG  |         |                | TTCATTGGAACAGAAAAGAAATGGATTTATCTGCTCTTCGCGTTGAAGAAG   |                                     |
| MO_1322 | NCOR2-RNF123<br>Junction sequence      | 296   | NM_006312.5                                         | 3       | NM_022064.4    | 27                                                    | Adrenocortical Carcinoma            |
|         |                                        |       | ACCCGCCCCACAGCCTTTCTACCCAGTGCAGATCGCCCGGACGCACACG   |         |                | GAGAAGATGCTGGACATCTACTGGCTGCTGCGGCTGCCTGCGGACCAT      |                                     |
| MO_1330 | KDM6A-RP1-154K9.2<br>Junction sequence | 16    | NM_021140.3                                         | 26      | RP1-154K9.2    | 8                                                     | Breast Invasive Ductal Carcinoma    |
|         |                                        |       | ATGGCACGAAATATCAAGGTCTCAGATCCAAAGCTTTTGGAAATGATTAA  |         |                | GCCTATAGGTTGAGTTGATCTGAAAGATAGGACTATTTGTGATCCAGAA     |                                     |
| MO_1330 | NCOR2-DHX37<br>Junction sequence       | 84    | NM_006312.5                                         | 7       | NM_032656.3    | 7                                                     | Breast Invasive Ductal Carcinoma    |
|         |                                        |       | TCGAGTCGAAGCACCAGCAGCCTGGTGCAGATCATCTACGACGAGAACCGG |         |                | GGTCTCTCCTACCAGATCCGGTATGAAGGAAACGTGACAGAGGAGACCA     |                                     |
| MO_1331 | PCNX-RAD51B<br>Junction sequence       | 84    | NM_014982.2                                         | 19      | NM_002877.5    | 8                                                     | Oral Cavity Squamous Cell Carcinoma |
|         |                                        |       | GTGTGCTGTATTTTGTCTATTCATGTAAGCACAGTCTTCACAGTATTGCAG |         |                | GTTATCTTGACGAATCAGATTACAACCCATCTGAGTGGAGCCCTGGCTTC    |                                     |
| MO_1333 | NF1-RNF135<br>Junction sequence        | 5     | NM_000267.3                                         | 1       | NM_032322.3    | 2                                                     | Embryonal Carcinoma                 |
|         |                                        |       | ACAGGCCGGTGGAAATGGGTCCAGGCCGTGGTCAGCCGCTTCGACGAGCAG |         |                | GTGGCAGTAGAGAAGAGCATCACAGAAGTTGCTCAGGAGCTGACAGAGCT    |                                     |
| MO_1337 | TMPRSS2-ERG<br>Junction sequence       | 87    | NM_005656.3                                         | 1       | NM_004449.4    | 4                                                     | Prostate Adenocarcinoma             |
|         |                                        |       | AGGCGGAGGCGGAGGGCGAGGGGCGGGGAGCGCCGCTGGAGCGCGGCAG   |         |                | GAAGCCTTATCAGTTGTGAGTGAGGACCAGTCGTTGTTGAGTGTGCCTA     |                                     |
| MO_1339 | MYC-PDLIM5<br>Junction sequence        | 17    | NM_002467.4                                         | 1       | NM_006457.4    | 8                                                     | Prostate Adenocarcinoma             |
|         |                                        |       | TCCTTGACAGCTGCTTAGACGCTGGATTTTTTTTCGGGTAGTGGAAAACAG |         |                | TAAGTCTCAGGAGCCTTCTCCGAGTTGGCTTCCTCGGTAGCTTCCACAC     |                                     |
| MO_1342 | NCOR1-6p22.1<br>Junction sequence      | 7     | NM_006311.3                                         | 14      | 6p22.1         | na                                                    | Adenocarcinoma, NOS                 |
|         |                                        |       | ATAAAGCCCTCGTCAGAAGGAATTATGGGAAACGCAGAGGCAGAAACCAG  |         |                | GGCCAGAAAGGACCTGTTTCTCAACACCCTGACCAGCACAGAACATTG      |                                     |
| MO_1344 | SS18-SSX1<br>Junction sequence         | 229   | NM_001007559.2                                      | 10      | NM_001278691.1 | 7                                                     | Synovial Sarcoma                    |
|         |                                        |       | AGCCTGGACCACCACAGCCACCCAGCAGAGGCCTTATGGATATGACCAG   |         |                | ATCATGCCCAAGAAGCCAGCAGAGGACGAAAATGATTCGAAGGGAGTGTG    |                                     |
| MO_1346 | KAT6A-KANSL1<br>Junction sequence      | 19    | NM_006766.4                                         | 2       | NM_015443.3    | 11                                                    | Soft Tissue Myoepithelial Carcinoma |
|         |                                        |       | CTCTTTCTGTTTACCTCCAGTGTCCCTTCTTCCACATGAAAAGGATAAG   |         |                | CAGCAGCCAGTAAGGAGGAGAAGGGGAGAGAGCTCATTGATATTAACAA     |                                     |

**Supplementary Table 6 cont. Pathogenic Fusions in the Metastatic 500 Cohort**

| CASE    | FUSION                                | READS                                                      | 5' ACCESSION   | 5' EXON | 3' ACCESSION   | 3' EXON                                                         | CANCER TYPE                          |
|---------|---------------------------------------|------------------------------------------------------------|----------------|---------|----------------|-----------------------------------------------------------------|--------------------------------------|
| MO_1359 | CREBBP-CRAMP1L<br>Junction sequence   | 99<br>TCCTGTTTGCCTCCCTTTGAAAAATGCCAGTGACAAGCGAAACCAACAAA   | NM_004380.2    | 5       | NM_020825.3    | 2<br>GAGCTGAAGGTGGTGGATCATCGTCTGAAATGTGTCTGGGGTTGCCCTT          | Breast Invasive Ductal Carcinoma     |
| MO_1359 | PVT- 8q23.3<br>Junction sequence      | 36<br>GAAACCTCGTGGCCTGGTCTCCATTATTTGAGATGAGTTACATCTTGGAG   | BM845333       | 1       | 8q23.3         | na<br>GATCTCCAACCTGTTGCACCTTTCTTCAAAGATACGGGCTTCTACAAGGTT       | Breast Invasive Ductal Carcinoma     |
| MO_1360 | KDM6A-AC007403.3<br>Junction sequence | 39<br>TTCTTTTGTCAATTAGGTCACCTTCAACCTCTTATTGGAAGATTATCCAAA  | NM_021140.3    | 3       | AC007403.3     | na<br>AGTGTTCACAAACCTGTCCCAGGCAGAGATGATTGTAAAGAGCCCCTCA         | Salivary Duct Carcinoma              |
| MO_1361 | ATRX-MAGT1<br>Junction sequence       | 1290<br>CAGAAGCCGACAAGGCGTTCAAGCGAAAACATGACCCTGAGCCCATGAG  | NM_000489.4    | 1       | NM_032121.5    | 9<br>TAATGTGTGTGGCTGGTATTGGACTTGTGTATTATTCTTCAGTTGGATG          | Bladder Urothelial Carcinoma         |
| MO_1364 | AXIN-TGFB1<br>Junction sequence       | 214<br>CAGAGCCTGTCCAGCGATGCAGACACCCTGTCCCTCACGGACAGCAGCGT  | NM_003502.3    | 3       | NM_000358.2    | 12<br>CATGCTGGTAGCTGCCATCCAGTCTGCAGGACTGACGGAGACCCTCAACC        | Breast Invasive Ductal Carcinoma     |
| MO_1364 | LCMT1-CTNNA2<br>Junction sequence     | 87<br>GCACTTTGTGAGACTGTCTAAAGAGAGGAAAGCCCCGAAATCAACAGAG    | NM_016309.2    | 2       | NM_004389.3    | 3<br>GTGACTACACTTGTCAACACAAGCAACAAAGGCCCATCTGGTAAAAAGAA         | Breast Invasive Ductal Carcinoma     |
| MO_1367 | ATRX-DACH2<br>Junction sequence       | 6<br>CAGAAGCCGACAAGGCGTTCAAGCGAAAACATGACCCTGAGCCCATGAG     | NM_000489.4    | 1       | NM_053281.3    | 6<br>GACTGGATCTGCCATTATGATGATGCCTCATCCCCACTTCCAGTCAGC           | Oral Cavity Squamous Cell Carcinoma  |
| MO_1372 | RB1-7p11.2<br>Junction sequence       | 5<br>ATTTAGAACGATGTGAACATCGAATCATGGAATCCCTTGCATGGCTCTCA    | NM_000321.2    | 3       | 7p11.2         | na<br>CACTGAAGAAGTGGAGTCTCAGAGGTACACAGCTGGCATGTGGCAGAAC         | Mullerian Adenocarcinoma             |
| MO_1381 | EWSR1-NR4A3<br>Junction sequence      | 179<br>GTCCTATGAAGACCCACCCACTGCCAAGGCTGCCGTGGAATGGTTTGATG  | NM_005243.3    | 12      | NM_173200.2    | 4<br>ATATGCCCTGCGTCCAAGCCCAATATAGCCCTTCCCCTCCAGGTTCCAGT         | Extraskeletal Myxoid Chondrosarcoma  |
| MO_1382 | SS18-SSX1<br>Junction sequence        | 261<br>AGCCTGGACCACCACAGCCACCCCAGCAGAGGCCTTATGGATATGACCAG  | NM_001007559.2 | 10      | NM_001278691.1 | 7<br>ATCATGCCCAAGAAGCCAGCAGAGGACGAAAATGATTCTGAAGGGAGTGTC        | Synovial Sarcoma                     |
| MO_1384 | BCAP29-BRAF<br>Junction sequence      | 49<br>GACTTTCGAAAGAATATGATCAACTCTGAAAGAACACTCTGAACTTCAG    | NM_018844.3    | 7       | NM_004333.4    | 11<br>AAAACACTTGGTAGACGGGACTCGAGTGATGATTGGGAGATTCTTGATGG        | Breast Invasive Ductal Carcinoma     |
| MO_1385 | MYBL1-NFIB<br>Junction sequence       | 170<br>TGGCGCTAAAACATACACCCTGAAAAACTACCATTTTCTCCTTCACAG    | NM_001080416.3 | 10      | NM_001282787.1 | 10<br>CTGAGGATTTGTGACTGGACCATGAATCAAACGGCAGGCATTTATACCC         | Adenoid Cystic Carcinoma             |
| MO_1387 | NOTCH2-SPAG17<br>Junction sequence    | 565<br>AGTCCCAGCAGATTGGATGAACCGCATGGAGGTGAATGAGACCCAGTACA  | NM_024408.3    | 34      | NM_206996.2    | intron 48<br>TTTGCCATTGAGAAACAATTTAATACCAAATATACAAAGCACCTAGCTTC | Breast Invasive Ductal Carcinoma     |
| MO_1390 | MYB-NFIB<br>Junction sequence         | 522<br>TCAAAGCATTTACAGTACCTAAAAACAGGTCCCTGGCGAGCCCCCTTGCAG | NM_005375.3    | 14      | NM_001282787.1 | 10<br>CTGAGGATTTGTGACTGGACCATGAATCAAACGGCAGGCATTTATACCC         | Adenoid Cystic Carcinoma             |
| MO_1391 | FUS-DDIT3<br>Junction sequence        | 16<br>GAACCAGTACAACAGCAGCAGTGGTGGTGGAGGTGGAGGTGGAGGTGGAG   | NM_004960.3    | 5       | NM_001195053.1 | 2<br>TGTTCAAGAAGGAAGTGTATCTTCATACATCACCCACACTGAAAGCAGGT         | Myxoid/Round-Cell Liposarcoma        |
| MO_1393 | NF1-CCR7<br>Junction sequence         | 89<br>ACAGGCCGGTGAATGGGTCCAGGCCGTGGTCCAGCCGCTTCGACGAGCAG   | NM_000267.3    | 1       | NM_001838.3    | 3<br>GTATGCCTGTGTCAAGATGAGGTACCGGACGATTACATCGGAGACAACAC         | Serous Ovarian Cancer                |
| MO_1404 | GREB1-NR4A3<br>Junction sequence      | 1068<br>GCCCCGTTCTGGGACGAACCCCAGCATCCTGATGGGAGCTCAGCAGGCAG | NM_014668.3    | 6       | NM_173200.2    | 2<br>AGCCCCACTGCGGAAGAGGGCAGCCCCGCAAGCCCCGGGCCCTGAGCCTGGA       | Uterine Leiomyosarcoma               |
| MO_1407 | TIMM29-SMARCA4<br>Junction sequence   | 11<br>AGAGGCCGGCGACGCGGTAGTGGCGAAGCCGGGAGTGTGGGCGCGGCTGG   | NM_138358.2    | 1       | NM_001128849.1 | 32<br>CAGTGGACGTCAGCTCAGCGAGGTCTTCATCCAGCTGCCCTCGCGAAAGG        | Poorly Differentiated Carcinoma, NOS |
| MO_1410 | TMPRSS2-ERG<br>Junction sequence      | 30<br>CGGAAAACCCCTATCCCACAGCCCACTGTGGTCCCCTACTGTCTACGAG    | NM_005656.3    | 3       | NM_004449.4    | 4<br>GAAGCCTTATCAGTTGTGAGTGAGGACCAGTCTGTTGTTGAGTGTGCCTA         | Prostate Adenocarcinoma              |

**Supplementary Table 6 cont. Pathogenic Fusions in the Metastatic 500 Cohort**

| CASE    | FUSION            | READS                                                                                                     | 5' ACCESSION   | 5' EXON  | 3' ACCESSION   | 3' EXON  | CANCER TYPE                       |
|---------|-------------------|-----------------------------------------------------------------------------------------------------------|----------------|----------|----------------|----------|-----------------------------------|
| MO_1411 | CREBBP-NARFL      | 268                                                                                                       | NM_004380.2    | 2        | NM_022493.2    | 2        | Breast Invasive Lobular Carcinoma |
|         | Junction sequence | TGACTGGTCACGCGGGACTGAACACCGCACAGGCAGGAGGCATGGCCAAG GAGTGCATCAAGCCTGTCAAAGTGGAAAAAGGGCGGGAAGTGGCGTGGC      |                |          |                |          |                                   |
| MO_1411 | PTEN-20q12.11     | 20                                                                                                        | NM_000314.6    | 7        | 20q12.11       | na       | Breast Invasive Lobular Carcinoma |
|         | Junction sequence | GTGATATCAAAGTAGAGTTCTTCCACAAAACAGAACAAGATGCTAAAAAAG GCACCTGCTCTGAACATGGGGATGTTTTTGTGGACTTTCCTCCTCCCTTG    |                |          |                |          |                                   |
| MO_1416 | PVT1-MYC          | 44                                                                                                        | NR_003367.3    | 1        | NM_002467.4    | 2        | Esophageal Adenocarcinoma         |
|         | Junction sequence | ATGTTGGCGGTCCCTGTGACCTGTGGAGACACGGCCAGATCTGCCCTCCA CAGCCTCCC CGCAGATGCCCTCAACGTTAGCTTCACCAACAGGAECTA      |                |          |                |          |                                   |
| MO_1418 | RUNX1-ERG         | 143                                                                                                       | NM_001754.4    | 5        | NM_004449.4    | intron 1 | Breast Invasive Ductal Carcinoma  |
|         | Junction sequence | CCAGGTTGCAAGATTTAATGACCTCAGGTTTGTCCGTCGAAGTGGAAAGAG CTCATAAATAGGAGGAAGAATGCGGGTGACATTTCCCAAGACTGCAGCAAA   |                |          |                |          |                                   |
| MO_1420 | CRTC3-PTEN        | 13                                                                                                        | NM_022769.4    | 10       | NM_000314.6    | 9        | Prostate Adenocarcinoma           |
|         | Junction sequence | GAACAACATCCCAGCTGCTATGACCCACCTGGGTATAAGAAGCTCCTCTG CTGAAACATTTGATGCTGCCGGTAAACTCCACTTAAAGTTTATAACCTGTG    |                |          |                |          |                                   |
| MO_1421 | PVT1-TNFRSF19     | 135                                                                                                       | NR_003367.3    | 1        | NM_018647.3    | 4        | Prostate Adenocarcinoma           |
|         | Junction sequence | ATGTTGGCGGTCCCTGTGACCTGTGGAGACACGGCCAGATCTGCCCTCCA GAATGTGGCTTCGGCTATGGGGAGGATGCACAGTGTGTGACGTGCCGGCT     |                |          |                |          |                                   |
| MO_1438 | ASPSR1-TFE3       | 64                                                                                                        | NM_024083.3    | 7        | NM_006521.5    | 6        | Alveolar Soft Part Sarcoma        |
|         | Junction sequence | AGGAGCAGGAGCGGGAGCGGGATCCCCAGCAGGAGCAGGAGCGGGAGCGG CTGCCTGTGTCCAGGAATCTGCTTGTGTGTACAGTAGTCAAGGCGTGGC      |                |          |                |          |                                   |
| MO_1439 | PTEN-Xq27.3       | 183                                                                                                       | NM_000314.6    | 7        | Xq27.3         | na       | Metaplastic Breast Cancer         |
|         | Junction sequence | GTGATATCAAAGTAGAGTTCTTCCACAAAACAGAACAAGATGCTAAAAAAG AGACTCTACTCTTCTAACTAGCACAGTGTCTCCAAAATCATCTGAAGAT     |                |          |                |          |                                   |
| MO_1446 | KDM6B-TP53        | 6                                                                                                         | NM_001080424.1 | 13       | NM_000546.5    | intron 1 | Prostate Adenocarcinoma           |
|         | Junction sequence | CGAAATCCCATCACAGTGATCCGGGGCCTGGCGGGCTCCCTGCGGCTCAG CCGGTTCTCTTACTTGGCAGAGGGAGGCTGCTATTCTCCGCCTGCATTT      |                |          |                |          |                                   |
| MO_1446 | RB1-RARB          | 3                                                                                                         | NM_000321.2    | 17       | NM_001290216.2 | intron 4 | Prostate Adenocarcinoma           |
|         | Junction sequence | ATTTAGAACGATGTGAACATCGAATCATGGAATCCCTTGCATGGCTCTCA GATAAAGCTGGGATATTTCTGAGCCTTGCCATCATTTTTTGTAAGTGATT     |                |          |                |          |                                   |
| MO_1447 | TMPRSS2-ERG       | 167                                                                                                       | NM_005656.3    | 1        | NM_004449.4    | 4        | Prostate Adenocarcinoma           |
|         | Junction sequence | AGGCGGAGGCGGAGGGCGAGGGGCGGGAGCGCCGCTGGAGCGCGGCAG GAAGCCTTATCAGTTGTGAGTGAGGACCAGTCTGTTGTTTGTGAGTGTGCCTA    |                |          |                |          |                                   |
| MO_1449 | BCOR-CCNB3        | 2236                                                                                                      | NM_017745.5    | 15       | NM_033031.2    | 5        | Ewing Sarcoma                     |
|         | Junction sequence | CCTCTGTAGAGTGGCTCCACCCAGTGATCTGGCCTCAGACACTACTGG CATAAGCTGGAAGTACACCAGTAGTACCTCTACTACCGTGGTACCAAA         |                |          |                |          |                                   |
| MO_1459 | TGFBR2-PREP       | 34                                                                                                        | NM_003242.5    | 5        | NM_002726.4    | 2        | Esophageal Adenocarcinoma         |
|         | Junction sequence | CATGGCTCTGGTGTCTGGGAAATGACATCTCGCTGTAATGCAGTGGGAG GTACAGGATTATCATGGTCATAAAATTTGTGACCCTTACGCCTGGCTTGA      |                |          |                |          |                                   |
| MO_1460 | PTEN-10q25.1      | 10                                                                                                        | NM_000314.6    | intron 1 | 10q25.1        | na       | Prostate Adenocarcinoma           |
|         | Junction sequence | TTAAAACCTTTCTCTAAAACCTGTACTTTTAGTTATGATATGCATAGAAAAGC AAGTCCAGGCAATAATTTTTTCAGCGTCTTGATTATCACACAGACAGTGAA |                |          |                |          |                                   |
| MO_1462 | DNAJB1-PRKACA     | 2520                                                                                                      | NM_006145.2    | 1        | NM_002730.3    | 2        | Fibrolamellar Carcinoma           |
|         | Junction sequence | GCTCAGCGACCCGCGCAAGCGCGAGATCTTCGACCGCTACGGGGAGGAAG TGAAAGAATTCTTAGCCAAAGCCAAAGAAGATTTTCTTAAAAAATGGGAA     |                |          |                |          |                                   |
| MO_1464 | FOXO3-FXR1        | 35                                                                                                        | NM_001455.3    | 1        | NM_005087.3    | 4        | Serous Ovarian Cancer             |
|         | Junction sequence | TGCCCTACTTCAAGGATAAGGGCGACAGCAACAGCTCTGCCGGCTGGAAG GTATATTCAAGAGCAAATGACCAAGAGCCATGTGGGTGGTGGTTGGCTAA     |                |          |                |          |                                   |
| MO_1466 | CPE-GNAS          | 15                                                                                                        | NM_001873.3    | 1        | NM_000516.5    | 1        | Pancreatic Neuroendocrine Tumor   |
|         | Junction sequence | GCCCCAGCAGCGCCGCGGGCTAAGCCCAGGGCCGGGCAGACAAAAGAG GCCCGCCGCCCATGGGCTGCCTCGGGAACAGTAAGACCGAGGACCAGCG        |                |          |                |          |                                   |
| MO_1472 | PVT1-SMARCD1      | 69                                                                                                        | NR_003367.3    | 1        | NM_020159.4    | 7        | Prostate Neuroendocrine Carcinoma |
|         | Junction sequence | ATGTTGGCGGTCCCTGTGACCTGTGGAGACACGGCCAGATCTGCCCTCCA GGAGAGGAATCAAATGAGTCTGCAGAACTAGCAGTAATTGGGAAAAGCA      |                |          |                |          |                                   |
| MO_1472 | TRAP1-CREBBP      | 75                                                                                                        | NM_016292.2    | 10       | NM_004380.2    | 10       | Prostate Neuroendocrine Carcinoma |
|         | Junction sequence | CCAGACCAAGGCCACGGACATCCTGCCAAGTGGCTGCGCTTCATCCGAG CCATCCTGGGGTCTCCAGCTAGTGAATTCAAACACAATTGGTTCTGTT        |                |          |                |          |                                   |

**Supplementary Table 6 cont. Pathogenic Fusions in the Metastatic 500 Cohort**

| CASE    | FUSION                                  | READS | 5' ACCESSION   | 5' EXON | 3' ACCESSION   | 3' EXON | CANCER TYPE                          |
|---------|-----------------------------------------|-------|----------------|---------|----------------|---------|--------------------------------------|
| MO_1473 | TMPRSS2-ERG<br>Junction sequence        | 119   | NM_005656.3    | 1       | NM_004449.4    | 4       | Prostate Adenocarcinoma              |
| MO_1473 | TP53-20q13.31<br>Junction sequence      | 148   | NM_000546.5    | 1       | NM_001013646.3 | 2       | Prostate Adenocarcinoma              |
| MO_1478 | SND1-BRAF<br>Junction sequence          | 152   | NM_014390.3    | 11      | NM_004333.4    | 11      | Pancreatic Neuroendocrine Tumor      |
| MO_1482 | CLTC-ETV1<br>Junction sequence          | 181   | NM_004859.3    | 13      | NM_004956.4    | 7       | Prostate Neuroendocrine Carcinoma    |
| MO_1482 | RB1-12p13.31<br>Junction sequence       | 16    | NM_000321.2    | 2       | 12p13.31       | na      | Prostate Neuroendocrine Carcinoma    |
| MO_1484 | LIFR-PLAG1<br>Junction sequence         | 9     | NM_001127671.1 | 1       | NM_002655.2    | 3       | Myoepithelial Carcinoma              |
| MO_1485 | RBM39-SMARCB1<br>Junction sequence      | 81    | NM_004902.3    | 3       | NM_003073.4    | 5       | Intrahepatic Cholangiocarcinoma      |
| MO_1493 | CTNNA1-DNAH14<br>Junction sequence      | 76    | NM_001903.4    | 5       | NM_001373.1    | 56      | Esophageal Adenocarcinoma            |
| MO_1496 | TMPRSS2-ERG<br>Junction sequence        | 337   | NM_005656.3    | 1       | NM_004449.4    | 4       | Prostate Neuroendocrine Carcinoma    |
| MO_1499 | SLC45A1-NCOR2<br>Junction sequence      | 16    | NM_001080397.2 | 8       | NM_006312.5    | 48      | Prostate Adenocarcinoma              |
| MO_1499 | TMPRSS2-ERG<br>Junction sequence        | 337   | NM_005656.3    | 1       | NM_004449.4    | 4       | Prostate Adenocarcinoma              |
| MO_1502 | MYB-NFIB<br>Junction sequence           | 1412  | NM_005375.3    | 12      | NM_001282787.1 | 8       | Adenoid Cystic Carcinoma             |
| MO_1507 | TGFBR2-3p24.1<br>Junction sequence      | 35    | NM_003242.5    | 3       | 3p24.1         | na      | Neuroendocrine Tumor, NOS            |
| MO_1509 | CDH1-RP11-17E2.2.1<br>Junction sequence | 194   | NM_004360.4    | 3       | RP11-17E2.2.1  | na      | Breast Invasive Lobular Carcinoma    |
| MO_1510 | TMPRSS2-ERG<br>Junction sequence        | 114   | NM_005656.3    | 1       | NM_004449.4    | 4       | Prostate Adenocarcinoma              |
| MO_1511 | TMPRSS2-ETV1<br>Junction sequence       | 879   | NM_005656.3    | 1       | NM_004956.4    | 7       | Prostate Adenocarcinoma              |
| MO_1514 | TMPRSS2-ERG<br>Junction sequence        | 308   | NM_005656.3    | 1       | NM_004449.4    | 4       | Prostate Adenocarcinoma              |
| MO_1517 | TMPRSS2-ERG<br>Junction sequence        | 278   | NM_005656.3    | 1       | NM_004449.4    | 3       | Prostate Adenocarcinoma              |
| MO_1518 | FGFR2-CCDC6<br>Junction sequence        | 1144  | NM_000141.4    | 17      | NM_005436.4    | 3       | Poorly Differentiated Carcinoma, NOS |



**Supplementary Table 6 cont. Pathogenic Fusions in the Metastatic 500 Cohort**

| CASE    | FUSION            | READS                                                                                                   | 5' ACCESSION   | 5' EXON  | 3' ACCESSION   | 3' EXON | CANCER TYPE                         |
|---------|-------------------|---------------------------------------------------------------------------------------------------------|----------------|----------|----------------|---------|-------------------------------------|
| MO_1525 | RB1-STIM1         | 79                                                                                                      | NM_000321.2    | 17       | NM_003156.3    | 6       | Osteosarcoma                        |
|         | Junction sequence | ATTTAGAACGATGTGAACATCGAATCATGGAATCCCTTGCATGGCTCTCA TGACTCGCCATAATCACCTCAAGGACTTCATGCTGGTGGTGTCTATCGTT   |                |          |                |         |                                     |
| MO_1527 | TAOK1-NF1         | 13                                                                                                      | NM_020791.2    | 6        | NM_000267.3    | 2       | Breast Invasive Ductal Carcinoma    |
|         | Junction sequence | GGTGCTCTTCAGGGATTAGCCTACTTACATTCTCATACTATGATTCATAG CTTCCAATAAAAAACAGGACAGCAGAACACACATAACCAAAGTCAGTACTGA |                |          |                |         |                                     |
| MO_1532 | POC5-PRKD1        | 32                                                                                                      | NM_001099271.1 | 10       | NM_001330069.1 | 13      | Salivary Carcinoma                  |
|         | Junction sequence | TTTCTGCTCTTGGTGCAGGATCTGCAGCTACTGCTGCATCAGAAGAAATG GACATCAGCACAGTATATCAGATTTTCTCTGATGAAGTACTGGTTCTGG    |                |          |                |         |                                     |
| MO_1536 | FRMD4A-PTEN       | 71                                                                                                      | NM_018027.4    | 16       | NM_000314.6    | 3       | Breast Invasive Ductal Carcinoma    |
|         | Junction sequence | CCCTGCGTCAGAGGCTGGAGGAAGCTGAAGAAGCTGTGTCTCCGAGAAGCT GTTTTTGGATTCAAAGCATAAAAACCATTACAAGATATAACAATCTTTGTG |                |          |                |         |                                     |
| MO_1536 | NF1-1p22.3        | 13                                                                                                      | NM_000267.3    | 10       | 1p22.3         | na      | Breast Invasive Ductal Carcinoma    |
|         | Junction sequence | GCCTTGTCTTCTTGCTTTCGTATAAGCCCTCACAAACCAACACTTTAAG GTTCTGGGGATTGTAATGGAGACATCTTTGAGGGGCTATGATTCTGCTCC    |                |          |                |         |                                     |
| MO_1541 | KIAA1549-BRAF     | 62                                                                                                      | NM_020910.2    | 14       | NM_004333.4    | 8       | Prostate Adenocarcinoma             |
|         | Junction sequence | CTGGACCCACGGCCAGCGTGCCCTCCGTGTTTCATAGAGCCAGGAAGAG GCCCCAAATTCTCACCAGTCCGTCTCCTTCAAATCCATTCCAATTCAC      |                |          |                |         |                                     |
| MO_1543 | RB1-9p11.2        | 9                                                                                                       | NM_000321.2    | 17       | 9p11.2         | na      | Prostate Adenocarcinoma             |
|         | Junction sequence | ATTTAGAACGATGTGAACATCGAATCATGGAATCCCTTGCATGGCTCTCA GCAAGAAAGCATGCAAACCTCTGAAGCACAGTGTAAAACACTTGAAGAGAT  |                |          |                |         |                                     |
| MO_1543 | TMPRSS2-ERG       | 129                                                                                                     | NM_005656.3    | 2        | NM_004449.4    | 4       | Prostate Adenocarcinoma             |
|         | Junction sequence | ACCTATCATTACTCGATGCTGTTGATAACAGCAAGATGGCTTTGAACTCA GAAGCCTTATCAGTTGTGAGTGAGGACCAGTCGTTGTTGAGTGTGCCTA    |                |          |                |         |                                     |
| MO_1553 | NCOR1-17p11.2     | 15                                                                                                      | NM_006311.3    | 14       | 17p11.2        | na      | Prostate Adenocarcinoma             |
|         | Junction sequence | ATAAAGCCCTCGTCCAGAAAGATTATGGGAAACGCAGAGGCAGAAACCAG GTGAATCCCCTGAGGAATGAATGCCTTGGTATTTGTGACTCCACATAAAT   |                |          |                |         |                                     |
| MO_1555 | NUBPL-NF1         | 5                                                                                                       | NM_025152.2    | 7        | NM_000267.3    | 9       | Angiosarcoma                        |
|         | Junction sequence | AGGAACTGGAGATGTGCAGTTATCAGTCTCACAGAAATTCCTATAACAG AAGTTATTTCTGGACAGTCTACGAAAAGCTCTTGCTGGCCATGGAGGAAG    |                |          |                |         |                                     |
| MO_1556 | TMPRSS2-ERG       | 14                                                                                                      | NM_001135099.1 | 1        | NM_004449.4    | 2       | Prostate Adenocarcinoma             |
|         | Junction sequence | CCCTGCCCGCCCGGAGGTGAAAGCGGGTGTGAGGAGCGCGCGCGGCAG GTTATTCAGGATCTTTGGAGACCCGAGGAAAGCCGTGTTGACCAAAGC       |                |          |                |         |                                     |
| MO_1562 | 22p11.2-PTEN      | 15                                                                                                      | 22p11.2        | na       | NM_000314.6    | 3       | Breast Invasive Ductal Carcinoma    |
|         | Junction sequence | CAGTTGATAGAAGTCTGGCAACTATCCCAAGTTTAATAAATAAGCAAATG GTTTTTGGATTCAAAGCATAAAAACCATTACAAGATATAACAATCTTTGTG  |                |          |                |         |                                     |
| MO_1563 | FAT1-STPG2        | 42                                                                                                      | NM_005245.3    | 2        | NM_174952.2    | 10      | Squamous Cell Carcinoma, NOS        |
|         | Junction sequence | CATTAGAGATGGCTCTGGCGTTGGTGTTTTCAAATAGGTGAAGAGACAG GTCCTGCAGCATAACAATCCTGTTTTAAGGAAATCTTGCCCCATACCCTTA   |                |          |                |         |                                     |
| TP_2001 | TMPRSS2-ERG       | 110                                                                                                     | NM_001135099.1 | 1        | NM_004449.4    | 4       | Prostate Adenocarcinoma             |
|         | Junction sequence | CCCTGCCCGCCCGGAGGTGAAAGCGGGTGTGAGGAGCGCGCGCGGCAG GAAGCCTTATCAGTTGTGAGTGAGGACCAGTCGTTGTTGAGTGTGCCTA      |                |          |                |         |                                     |
| TP_2009 | CANT1-ETV4        | 281                                                                                                     | NM_138793.3    | intron 1 | NM_001986.2    | 1       | Prostate Adenocarcinoma             |
|         | Junction sequence | TTATAGCCTTGCTCAGAGTGCAGCGGCAGGCCTGGGGATGGCCTCGGGAG CTCAGGTACCAGACAGTGTGAGCAGTTTGTTCCTGATTTCCATTAGAA     |                |          |                |         |                                     |
| TP_2015 | CDH1-LARS         | 192                                                                                                     | NM_004360.4    | intron 2 | NM_020117.10   | 17      | Breast Invasive Ductal Carcinoma    |
|         | Junction sequence | GCGCCCGATCTCGTCTGATCTCGGAAGCTAAGCAGGGTCTGGGCTGGTTA GTACTTGGATTATGGAGAAGAGAATTGGAAGAAACAGACATCTCAGTGTCT  |                |          |                |         |                                     |
| TP_2020 | GPR179-ETV4       | 951                                                                                                     | NM_001004334.3 | 11       | NM_001986.2    | 5       | Prostate Adenocarcinoma             |
|         | Junction sequence | AGGCAGGAGGATGACCAGGGTCTAGGGGAACGGAAAGCTGAGAGAGCAG CTCAGGTACCAGACAGTGTGAGCAGTTTGTTCCTGATTTCCATTAGAA      |                |          |                |         |                                     |
| TP_2023 | CIC-CITED1        | 154                                                                                                     | NM_015125.4    | 20       | NM_001144885.1 | 3       | Undifferentiated High-Grade Sarcoma |
|         | Junction sequence | CTGCCCGCCACTGCCTCCACCCCCAGAGTCGGGGCTGGACAGCCTGGC TTATCCAACCTTCTGCCAAGGCTCTGAAATGCCAACCAACGTCGAGGCCTGC   |                |          |                |         |                                     |
| TP_2024 | ZFH3-21p11.2      | 13                                                                                                      | NM_006885.3    | 2        | 21p11.2        | na      | Small Cell Lung Cancer              |
|         | Junction sequence | CTGGGAAACGGGGCGCGCTGGAAGCGGCCGCCCTCGCCGTCACG TCGTCTACCAGCCGGACGGCTCCGCTACATTGTGGAGAGCCTGAGCCAG          |                |          |                |         |                                     |

**Supplementary Table 6 cont. Pathogenic Fusions in the Metastatic 500 Cohort**

| CASE    | FUSION            | READS                                                                                                   | 5' ACCESSION      | 5' EXON  | 3' ACCESSION   | 3' EXON | CANCER TYPE                                      |
|---------|-------------------|---------------------------------------------------------------------------------------------------------|-------------------|----------|----------------|---------|--------------------------------------------------|
| TP_2028 | EZH2-ZNF425       | 71                                                                                                      | NM_004456.4       | 3        | NM_001001661.2 | 2       | Sebaceous Carcinoma                              |
|         | Junction sequence | AGCCTGTGCACATCCTGACTTCTGTGAGCTCATTGCGCGGACTAGGGAG GTAAC TGTGACATTTGATGATGTGGCCTTATATTTTTCGGAACAAGAGTG   |                   |          |                |         |                                                  |
| TP_2032 | SMARCA1-1q32.1    | 41                                                                                                      | NM_003069.4       | 19       | 1q32.1         | na      | Prostate Adenocarcinoma                          |
|         | Junction sequence | AGCTCCTGGAAAAGGAAATTCCTTTATTATCGGAAGACAATAGGCTATAAG TGGCATTTTTCACTTGAATGATTCTGCTTCGTGCAACATCAGGATAAGCA  |                   |          |                |         |                                                  |
| TP_2034 | TMPRSS2-ERG       | 153                                                                                                     | NM_005656.3       | 1        | NM_004449.4    | 2       | Prostate Adenocarcinoma                          |
|         | Junction sequence | AGGCGGAGGCGGAGGGCGAGGGGCGGGGAGCGCCGCTGGAGCGCGGCAG GTTATTCAGGATCTTTGGAGACCCGAGGAAAGCCGTGTTGACCAAAAGC     |                   |          |                |         |                                                  |
| TP_2034 | TP53-21q22.2      | 29                                                                                                      | NM_000546.5       | 9        | 21q22.2        | na      | Prostate Adenocarcinoma                          |
|         | Junction sequence | CTCCCCAGCCAAAGAAGAAACCCTGGATGGAGAATATTTACCCCTTCAG GTAAATCCAATCCTCCAAATGAAGGAAAACAAC TACGAAAATATTTTAGG   |                   |          |                |         |                                                  |
| TP_2037 | TMPRSS2-DSCAM-ERC | 135                                                                                                     | NM_005656.3       | 1        | NM_001389.3    | 17      | Prostate Adenocarcinoma                          |
|         | Junction sequence | AGGCGGAGGCGGAGGGCGAGGGGCGGGGAGCGCCGCTGGAGCGCGGCAG GCTCCCAAGAAACATTTGCAAAATGGGATTATCCGTGGCTACCAAATAGG    |                   |          |                |         |                                                  |
| TP_2037 | TP53-NKIRAS2      | 24                                                                                                      | NM_000546.5       | 1        | NM_017595.5    | 2       | Prostate Adenocarcinoma                          |
|         | Junction sequence | TCGGGCTGGGAGCGTGCTTTCCACGACGGTGACACGCTTCCCTGGATTGG GTTGAAAAC TAAGCATGGGGAAGAGCTGCAAGGTGGTTCGTGTGTGGCCAG |                   |          |                |         |                                                  |
| TP_2043 | NAB2-STAT6        | 394                                                                                                     | NM_005967.3       | 2        | NM_003153.4    | 2       | Solitary Fibrous Tumor                           |
|         | Junction sequence | GACCTTCATCCAGCAGGGAGGGGACGACGTGCAGCAGCTGTGTGAGGCCG GCAACCTCCAAGTCCCAGATCATGTCTCTGTGGGTCTGGTCTCCAAGAT    |                   |          |                |         |                                                  |
| TP_2050 | NFATC2-EYA2       | 12                                                                                                      | NM_012340.4       | 5        | NM_005244.4    | 6       | Seminal Vesicle Carcinoma                        |
|         | Junction sequence | CAGTGGCAGAATCGTCTCTTTACAGACTGCATCTAACCCCATCGAGTGCT GCACAACAGGGTCTATCAAGGAGGAAATGGACTGGGCAACGCAGCCGGT    |                   |          |                |         |                                                  |
| TP_2050 | SMARCC1-MAP4      | 7                                                                                                       | NM_003074.3       | 11       | NM_002375.4    | 11      | Seminal Vesicle Carcinoma                        |
|         | Junction sequence | GCACCTGTATCCCAGCTGAAACGAGAGGCTGAGGTGGGAGTACTTGA GCAACAGCAGCAGCTGTTGTGGTTTTTGC AACAGTCTGAGTGCTCTTGGA     |                   |          |                |         |                                                  |
| TP_2052 | EML4-ALK          | 60                                                                                                      | ENST00000401738.3 | 7        | NM_004304.4    | 20      | Poorly Differentiated Non-Small Cell Lung Cancer |
|         | Junction sequence | TGTCATCATCAACCAAGCAAAAATGTCAACTCGCGAAAAAACAGCCAAG TGTACCGCCGGAAGCACCAGGAGCTGCAAGCCATGCAGATGGAGCTGCAG    |                   |          |                |         |                                                  |
| TP_2054 | TMPRSS2-ERG       | 36                                                                                                      | NM_005656.3       | 1        | NM_004449.4    | 4       | Prostate Adenocarcinoma                          |
|         | Junction sequence | AGGCGGAGGCGGAGGGCGAGGGGCGGGGAGCGCCGCTGGAGCGCGGCAG GAAGCCTTATCAGTTGTGAGTGAGGACCAGTCGTTGTTTGAGTGTGCCTA    |                   |          |                |         |                                                  |
| TP_2059 | CDKN2A-9p21.1     | 4                                                                                                       | NM_058195.3       | 1        | 9p21.1         | na      | Extramammary Paget Disease                       |
|         | Junction sequence | GCTACTGAGGAGCCAGCGTCTAGGGCAGCAGCCGCTTCTAGAAAGACCAG TGAGAAGAGAAGTACTTTGATAAAATGTGGCTTTTCGGGACCCACCCCTG   |                   |          |                |         |                                                  |
| TP_2060 | PTEN-PRAMEF2      | 12                                                                                                      | NM_000314.6       | 4        | NM_023014.1    | 4       | Prostate Adenocarcinoma                          |
|         | Junction sequence | CAATCTTTGTGCTGAAAGACATTATGACACCGCCAAATTTAATTGCAGAG GTGCCTCCAGAACCCCTTGGAGA ACTTGAATTA ACTTGTGGCAACCTAT  |                   |          |                |         |                                                  |
| TP_2061 | TBL1XR1-PIK3CA    | 452                                                                                                     | NM_024665.5       | 1        | NM_006218.3    | 2       | Prostate Carcinosarcoma                          |
|         | Junction sequence | TGCCCTCCATTCCCGGGAGGGGGGAGCGGCGTTGGAGGCCACCGTTTCCAG GTTCTGCTTTGGGACAACCATA CATCTAATTCCCTAAAGTAGTTTTATA  |                   |          |                |         |                                                  |
| TP_2064 | NF1-19q13.2       | 12                                                                                                      | NM_000267.3       | 35       | 19q13.2        | na      | Prostate Adenocarcinoma                          |
|         | Junction sequence | GCTGGGACTTCCAAAGCTGGGAATCCTATTTTTTATTATGTTGCACGGAG CGCACACCTGCCGATTCTGGCTGATCTCGGAATACGCTCATGCATCGGGG   |                   |          |                |         |                                                  |
| TP_2065 | NF2-KCNMB3P1      | 159                                                                                                     | NM_000268.3       | 1        | NM_014407.3    | 3       | Glioblastoma Multiforme                          |
|         | Junction sequence | TCACCGTGAGGATCGTCAACATGGACGCCGAGATGGAGTTCAATTGCGAG CATTCGGAGAGAAGAATCAACCTGCACTGCCATCCACACAGATATCATGG   |                   |          |                |         |                                                  |
| TP_2067 | PTEN-10p12.31     | 11                                                                                                      | NM_000314.6       | intron 1 | 10p12.31       | na      | Uterine Leiomyosarcoma                           |
|         | Junction sequence | ATCAGGTGAGGGTAACTACCATGGTTTGTGTTGCTATACTGTGTTAGGGTT ATTACGGTGGGATGACCAGCTTCTTCATGTGCTATGCAAATGTACACCT   |                   |          |                |         |                                                  |
| TP_2069 | TMPRSS2-ERG       | 264                                                                                                     | NM_005656.3       | 1        | NM_004449.4    | 4       | Prostate Adenocarcinoma                          |
|         | Junction sequence | AGGCGGAGGCGGAGGGCGAGGGGCGGGGAGCGCCGCTGGAGCGCGGCAG GAAGCCTTATCAGTTGTGAGTGAGGACCAGTCGTTGTTTGAGTGTGCCTA    |                   |          |                |         |                                                  |
| TP_2072 | BBS9-BRAF         | 7                                                                                                       | NM_014451.3       | 17       | NM_004333.4    | 4       | Solitary Fibrous Tumor                           |
|         | Junction sequence | CTGCCCTCTTCAACACCTGGACACCTTGTTAGATGGAACCTACAAGCAG GTACCTGCAAGGTGTGGAGTTACAGTCCGAGACAGTCTAAAGAAAGCACT    |                   |          |                |         |                                                  |

**Supplementary Table 6 cont. Pathogenic Fusions in the Metastatic 500 Cohort**

| CASE    | FUSION            | READS                                                                                                  | 5' ACCESSION   | 5' EXON | 3' ACCESSION   | 3' EXON | CANCER TYPE                          |
|---------|-------------------|--------------------------------------------------------------------------------------------------------|----------------|---------|----------------|---------|--------------------------------------|
| TP_2072 | NAB2-STAT6        | 1831                                                                                                   | NM_005967.3    | 6       | NM_003153.4    | 17      | Solitary Fibrous Tumor               |
|         | Junction sequence | CCGCGTGGGCCCGCCTCAGCCCCTGTGTGCCTGCGAAGCCACCTCTCGCAG CTGAACAGATGGGTAAAGGATGGCAGGGTTATGTCCCAGCTACCATCAAG |                |         |                |         |                                      |
| TP_2073 | SAV1-ABHD12D      | 14                                                                                                     | NM_021818.3    | 4       | NM_001206673.1 | 10      | Pleural Mesothelioma                 |
|         | Junction sequence | ACTGCAGAAATTCCCTGACTGGCTTCAGGTTTACGCACGAGCCCCTGTGAA ATTTACCGGAACATTCCAGGATTTTTACGTACACTTATGGATGCCCTGAG |                |         |                |         |                                      |
| TP_2075 | NAB2-STAT6        | 1137                                                                                                   | NM_005967.3    | 6       | NM_003153.4    | 17      | Solitary Fibrous Tumor               |
|         | Junction sequence | CCGCGTGGGCCCGCCTCAGCCCCTGTGTGCCTGCGAAGCCACCTCTCGCAG CTGAACAGATGGGTAAAGGATGGCAGGGTTATGTCCCAGCTACCATCAAG |                |         |                |         |                                      |
| TP_2077 | TMPRSS2-ERG       | 441                                                                                                    | NM_005656.3    | 1       | NM_004449.4    | 4       | Prostate Adenocarcinoma              |
|         | Junction sequence | AGGCGGAGGCGGAGGGCGAGGGGCGGGGAGCGCCGCTGGAGCGCGGCAG GAAGCCTTATCAGTTGTGAGTGAGGACCAGTCGTTGTTTGTGAGTGTGCCTA |                |         |                |         |                                      |
| TP_2079 | TMPRSS2-ERG       | 694                                                                                                    | NM_005656.3    | 1       | NM_004449.4    | 4       | Prostate Adenocarcinoma              |
|         | Junction sequence | AGGCGGAGGCGGAGGGCGAGGGGCGGGGAGCGCCGCTGGAGCGCGGCAG GAAGCCTTATCAGTTGTGAGTGAGGACCAGTCGTTGTTTGTGAGTGTGCCTA |                |         |                |         |                                      |
| TP_2090 | DDX17-ETV1        | 287                                                                                                    | NM_006386.4    | 1       | NM_004956.4    | 9       | Prostate Adenocarcinoma              |
|         | Junction sequence | ATGCGCGGAGGAGGCTTTGGGGACCGGGACCGGGATCGTGACCGTGGAGG ATTTGCGCCGACGCTTTCTGAACCTGTAACCTCTTCTCTCTTTGCCGA    |                |         |                |         |                                      |
| TP_2093 | TMPRSS2-ERG       | 213                                                                                                    | NM_005656.3    | 1       | NM_004449.4    | 4       | Prostate Adenocarcinoma              |
|         | Junction sequence | AGGCGGAGGCGGAGGGCGAGGGGCGGGGAGCGCCGCTGGAGCGCGGCAG GAAGCCTTATCAGTTGTGAGTGAGGACCAGTCGTTGTTTGTGAGTGTGCCTA |                |         |                |         |                                      |
| TP_2096 | TMPRSS2-ERG       | 312                                                                                                    | NM_005656.3    | 1       | NM_004449.4    | 4       | Prostate Adenocarcinoma              |
|         | Junction sequence | AGGCGGAGGCGGAGGGCGAGGGGCGGGGAGCGCCGCTGGAGCGCGGCAG GAAGCCTTATCAGTTGTGAGTGAGGACCAGTCGTTGTTTGTGAGTGTGCCTA |                |         |                |         |                                      |
| TP_2102 | APC-DPYSL3        | 10                                                                                                     | NM_000038.5    | 7       | NM_001197294.1 | 2       | Undifferentiated Pleomorphic Sarcoma |
|         | Junction sequence | ACATACTTCGTATACGACAGCTTTTACAGTCCCAAGCAACAGAAGCAGAG GTTCTCCTTTAAGGAAAATTGAGAACCAAGGGCATGAAGAGTTGCCTGGC  |                |         |                |         |                                      |
| TP_2102 | 3p26.3-BRAF       | 5                                                                                                      | 3p26.3         | na      | NM_004333.4    | 4       | Undifferentiated Pleomorphic Sarcoma |
|         | Junction sequence | AAAACACCGACAACCCAAAGGATGGGATTTTACGTCAAGACATCTCCAG GTACCTGCAAGGTGTGGAGTTACAGTCCGAGACAGTCTAAAGAAAGCACT   |                |         |                |         |                                      |
| TP_2102 | SSH2-TP53         | 106                                                                                                    | NM_001282129.1 | 1       | NM_000546.5    | 7       | Undifferentiated Pleomorphic Sarcoma |
|         | Junction sequence | CGGTCCAGCGGTACCTACCCCCAGCACACCTCCAGCCCCTGCGCCTCG GTTGGCTCTGACTGTACCACCATCCACTACAACCTACATGTGTAACAGTTC   |                |         |                |         |                                      |
| TP_2156 | RB1-ELMOD3        | 20                                                                                                     | NM_000321.2    | 2       | NM_001135021.1 | 12      | Prostate Adenocarcinoma              |
|         | Junction sequence | AGAGAGCTTGTTAACTTGGGAGAAAGTTTCATCTGTGGATGGAGTATTG GAGCGAATCCAGCCACAGACCTGAGAGGCGCAGGCTTCCTTGCCCTCCTG   |                |         |                |         |                                      |
| TP_2156 | TMPRSS2-ERG       | 2                                                                                                      | NM_001135099.1 | 1       | NM_004449.4    | 4       | Prostate Adenocarcinoma              |
|         | Junction sequence | CCCTGCCCGCCCGGAGGTGAAAGCGGGTGTGAGGAGCGCGCGCGGCAG GAAGCCTTATCAGTTGTGAGTGAGGACCAGTCGTTGTTTGTGAGTGTGCCTA  |                |         |                |         |                                      |

**Supplementary Table 7. Immune Cell Infiltration Analyses**

| CASE    | Biopsy site    | Cancer                  | Cohort | Tumor Content | STROMA Score | Mimm Score | Immune Cluster | APC Cluster | T-cell Cluster | Infiltration Nomination | # TCRb templates | # TCRb clones |
|---------|----------------|-------------------------|--------|---------------|--------------|------------|----------------|-------------|----------------|-------------------------|------------------|---------------|
| TP_2069 | Lymph Node     | Prostate Adenocarcinoma | PRAD   | 0.54          | 39.9         | 74.8       | 5              | 1           | 1              | positive                | 93459            | 21684         |
| MO_1183 | Subcut. Nodule | Cutaneous Melanoma      | SKCM   | 0.58          | 67.6         | 195.4      | 7              | 1           | 1              | positive                | 87642            | 13200         |
| MO_1135 | Rectus Muscle  | Bladder Urothelial Ca.  | BLCA   | 0.58          | 74.8         | 154.2      | 5              | 1           | 1              | positive                | 66695            | 3768          |
| MO_1188 | Lymph Node     | Breast Ductal Carcinoma | BRCA   | 0.3           | -38.4        | 147.4      | 5              | 1           | 1              | positive                | 274016           | 33552         |
| MO_1533 | Subcut. Nodule | Breast Ductal Carcinoma | BRCA   | 0.58          | 8.7          | 170.1      | 5              | 1           | 1              | positive                | 105473           | 21099         |
| MO_1146 | Subcut. Nodule | Cutaneous Melanoma      | SKCM   | 0.35          | 60.7         | 129.5      | 5              | 1           | 1              | positive                | 174078           | 35432         |
| MO_1374 | Breast         | Cutaneous Melanoma      | SKCM   | 0.42          | 6.3          | 159.1      | 5              | 1           | 1              | positive                | 121675           | 12557         |
| MO_1187 | Liver          | Oral Squamous Cell Ca.  | HNSC   | 0.69          | -169.4       | -180.0     | 1              | 0           | 0              | negative                | 3483             | 1969          |
| MO_1458 | Soft Tissue    | Serous Ovarian Cancer   | MISC   | 0.6           | -70.6        | -152.6     | 1              | 0           | 0              | negative                | 7697             | 3587          |
| MO_1277 | Bone           | Prostate Adenocarcinoma | PRAD   | 0.86          | -58.4        | -149.0     | 2              | 0           | 0              | negative                | 1111             | 920           |
| MO_1202 | Liver          | Prostate Adenocarcinoma | PRAD   | 0.52          | -79.7        | -144.1     | 6              | 0           | 0              | negative                | 16901            | 6285          |
| MO_1482 | Liver          | Prostate Neuroendocrine | PRAD   | 0.85          | -134.5       | -135.5     | 3              | 0           | 0              | negative                | 1695             | 960           |
| MO_1449 | Lung           | Ewing Sarcoma           | SARC   | 0.25          | -65.8        | -187.4     | 1              | 0           | 0              | negative                | 1295             | 802           |
| MO_1220 | Lymph Node     | Small-Round-Cell Tumor  | SARC   | 0.34          | -64.1        | -182.2     | 6              | 0           | 0              | negative                | 4917             | 2907          |
